# Supplementary material
Source: PubMed Central journal article supplement (PMC3740340)

Supplementary Table 1  
 siRNA Oligonucleotide Sequences not Used for IGFBP-3 Knockdown

| siRNA Sequence       | nucleotides | Source                              |
|----------------------|-------------|-------------------------------------|
| GCUACAAAGUUGACUACGA  | 686-704     | ON-TARGET Plus SMART pool sequences |
| GAAAUGCUAGUGAGUCGGA  | 536-554     | ON-TARGET Plus SMART pool sequences |
| GCACAGAUACCCAGAACUU  | 713-731     | ON-TARGET Plus SMART pool sequences |
| GAAUAUGGUCCCUGCCGUA  | 757-775     | ON-TARGET Plus SMART pool sequences |
| UAUCGAGAAUAGGAAAACC  | 1427-1445   | siDESIGN center                     |
| GCAGCCUCUCCCAGGCUACA | 940-958     | siDESIGN center                     |
| GCAUAAGCUCUUUAAAGGCA | 1895-1913   | siDESIGN center                     |
| UGCCUGGAUUCCACAGCUU  | 44-62       | siDESIGN center                     |
| AAGCAGCGTGCCCCGGUUG  | 106-124     | siDESIGN center                     |
| AAAGGCAAAGCUUUAUUUU  | 1908-1926   | siDESIGN center                     |

Oligonucleotide sequences used for siRNA oligonucleotides tested to induce *IGFBP-3* knockdown. Sequences 1-4 were from ON-TARGET Plus SMART pool sequences (Cat. # L-004777-00-0005, Dharmacon, Lafayette, CO). Sequences 5-10 were generated in our laboratory using the siDESIGN center from the Dharmacon website ([www.dharmacon.com](http://www.dharmacon.com)) by inputting the Genbank accession number NM\_000598 (IGFBP-3).

## Supplementary Table 2

### Transcripts Activated by NKX3.1 in PC-3 Cells

PC-3 cells were stably transfected with the pcDNA3.1 empty vector or NKX3.1 expression vector and mRNA from two clones of each cell type was isolated for microarray analysis on the Affymetrix U-133 expression array. Analyses of results from each pair of clones of the same genotype that did not match up were discarded to ensure clonal variation was not a factor. 984 genes were found to be up- or down-regulated more than 1.4 fold in the NKX3.1 expressing PC-3 cells, in comparison to the PC-3 control cells. The 6<sup>th</sup> and 9<sup>th</sup> most activated probe sets were for human growth hormone-dependent insulin-like growth factor-binding protein, now known as IGFBP-3.

Supplementary Table 2

| NAME        | Fold Change | Description                                                                                                                                                                                                                                                                                                                                                                                         |
|-------------|-------------|-----------------------------------------------------------------------------------------------------------------------------------------------------------------------------------------------------------------------------------------------------------------------------------------------------------------------------------------------------------------------------------------------------|
| 204081_at   | 17.93       | gb:NM_006176.1 /DEF=Homo sapiens neurogranin (protein kinase C substrate, RC3) (NRGN), mRNA. /FEA=mRNA /GEN=NRGN /PROD=neurogranin /DB_XREF=gi:5453799 /UG=Hs.26944 neurogranin (protein kinase C substrate, RC3) /FL=gb:BC002835.1 gb:U89165.1 gb:NM_006176.1                                                                                                                                      |
| 205067_at   | 14.79       | gb:NM_000576.1 /DEF=Homo sapiens interleukin 1, beta (IL1B), mRNA. /FEA=mRNA /GEN=IL1B /PROD=interleukin 1, beta /DB_XREF=gi:10835144 /UG=Hs.126256 interleukin 1, beta /FL=gb:NM_000576.1 gb:K02770.1 gb:M15330.1 gb:M54933.1                                                                                                                                                                      |
| 39402_at    | 11.88       | Cluster Incl. M15330:Human interleukin 1-beta (IL1B) mRNA, complete cds /cds=(86,895) /gb=M15330 /gi=186283 /ug=Hs.126256 /len=1497                                                                                                                                                                                                                                                                 |
| 204953_at   | 11.53       | gb:NM_014841.1 /DEF=Homo sapiens KIAA0656 gene product (KIAA0656), mRNA. /FEA=mRNA /GEN=KIAA0656 /PROD=KIAA0656 gene product /DB_XREF=gi:7662227 /UG=Hs.12477 synaptosomal-associated protein, 91 kDa (mouse) homolog /FL=gb:AB014556.1 gb:NM_014841.1                                                                                                                                              |
| 209372_x_at | 10.61       | Consensus includes gb:BF971587 /FEA=EST /DB_XREF=gi:12338802 /DB_XREF=est:602239834F1 /CLONE=IMAGE:4328385 /UG=Hs.179661 tubulin, beta polypeptide /FL=gb:BC001352.1                                                                                                                                                                                                                                |
| 210095_s_at | 10.23       | gb:M31159.1 /DEF=Human growth hormone-dependent insulin-like growth factor-binding protein mRNA, complete cds. /FEA=mRNA /GEN=IGFBP1 /DB_XREF=gi:183115 /UG=Hs.77326 insulin-like growth factor binding protein 3 /FL=gb:BC000013.1 gb:M31159.1                                                                                                                                                     |
| 207714_s_at | 9.61        | gb:NM_004353.1 /DEF=Homo sapiens serine (or cysteine) proteinase inhibitor, clade H (heat shock protein 47), member 1 (SERPINH1), mRNA. /FEA=mRNA /GEN=SERPINH1 /PROD=serine (or cysteine) proteinase inhibitor, cladeH (heat shock protein 47), member 1 /DB_XREF=gi:4757923 /UG=Hs.241579 serine (or cysteine) proteinase inhibitor, clade H (heat shock protein 47), member 1 /FL=gb:NM_004353.1 |
| 208581_x_at | 9.26        | gb:NM_005952.1 /DEF=Homo sapiens metallothionein 1X (MT1X), mRNA. /FEA=CDS /GEN=MT1X /PROD=metallothionein 1X /DB_XREF=gi:10835231 /UG=Hs.278462 metallothionein 1X /FL=gb:NM_005952.1                                                                                                                                                                                                              |
| 212143_s_at | 9.22        | Consensus includes gb:BF340228 /FEA=EST /DB_XREF=gi:11286690 /DB_XREF=est:602036816F1 /CLONE=IMAGE:4185050 /UG=Hs.77326 insulin-like growth factor binding protein 3 /FL=gb:NM_000598.1                                                                                                                                                                                                             |
| 204614_at   | 9.18        | gb:NM_002575.1 /DEF=Homo sapiens serine (or cysteine) proteinase inhibitor, clade B (ovalbumin), member 2 (SERPINB2), mRNA. /FEA=mRNA /GEN=SERPINB2 /PROD=serine (or cysteine) proteinase inhibitor, cladeB (ovalbumin), member 2 /DB_XREF=gi:4505594 /UG=Hs.75716 serine (or cysteine) proteinase inhibitor, clade B (ovalbumin), member 2 /FL=gb:J02685.1 gb:J03603.1 gb:M18082.1 gb:NM_002575.1  |
| 209118_s_at | 8.33        | gb:AF141347.1 /DEF=Homo sapiens hum-a-tub2 alpha-tubulin mRNA, complete cds. /FEA=mRNA /PROD=alpha-tubulin /DB_XREF=gi:4929133 /UG=Hs.272897 Tubulin, alpha, brain-specific /FL=gb:AF141347.1 gb:NM_006009.1                                                                                                                                                                                        |
| 216971_s_at | 7.97        | Consensus includes gb:Z54367 /DEF=H.sapiens gene for plectin /FEA=CDS /DB_XREF=gi:1296661 /UG=Hs.79706 plectin 1, intermediate filament binding protein, 500kD                                                                                                                                                                                                                                      |
| 204247_s_at | 7.83        | gb:NM_004935.1 /DEF=Homo sapiens cyclin-dependent kinase 5 (CDK5), mRNA. /FEA=mRNA /GEN=CDK5 /PROD=cyclin-dependent kinase 5 /DB_XREF=gi:4826674 /UG=Hs.166071 cyclin-dependent kinase 5 /FL=gb:BC005115.1 gb:NM_004935.1                                                                                                                                                                           |
| 203921_at   | 7.48        | gb:NM_004267.1 /DEF=Homo sapiens carbohydrate (chondroitin 6keratan) sulfotransferase 2 (CHST2), mRNA. /FEA=mRNA /GEN=CHST2 /PROD=carbohydrate (chondroitin 6keratan)sulfotransferase 2 /DB_XREF=gi:4757983 /UG=Hs.8786 carbohydrate (chondroitin 6keratan) sulfotransferase 2 /FL=gb:AB021124.1 gb:AB014679.1 gb:AB014680.1 gb:AF083066.1 gb:NM_004267.1                                           |

|             |      |                                                                                                                                                                                                                                                                                                                          |
|-------------|------|--------------------------------------------------------------------------------------------------------------------------------------------------------------------------------------------------------------------------------------------------------------------------------------------------------------------------|
| 204222_s_at | 7.24 | gb:NM_006851.1 /DEF=Homo sapiens glioma pathogenesis-related protein (RTVP1), mRNA. /FEA=mRNA /GEN=RTVP1 /PROD=glioma pathogenesis-related protein /DB_XREF=gi:5803150 /UG=Hs.64639 glioma pathogenesis-related protein /FL=gb:U16307.1 gb:NM_006851.1                                                                   |
| 209215_at   | 7.24 | gb:L11669.1 /DEF=Human tetracycline transporter-like protein mRNA, complete cds. /FEA=mRNA /PROD=tetracycline transporter-like protein /DB_XREF=gi:307501 /UG=Hs.157145 tetracycline transporter-like protein /FL=gb:L11669.1 gb:NM_001120.1                                                                             |
| 219140_s_at | 7.18 | gb:NM_006744.2 /DEF=Homo sapiens retinol-binding protein 4, interstitial (RBP4), mRNA. /FEA=mRNA /GEN=RBP4 /PROD=retinol-binding protein 4, interstitialprecursor /DB_XREF=gi:8400727 /UG=Hs.76461 retinol-binding protein 4, interstitial /FL=gb:AF119868.1 gb:NM_006744.2                                              |
| 222242_s_at | 7.13 | Consensus includes gb:AF243527 /DEF=Homo sapiens serine protease gene cluster, complete sequence /FEA=CDS_12 /DB_XREF=gi:11244757 /UG=Hs.50915 kallikrein 5                                                                                                                                                              |
| 211456_x_at | 6.98 | gb:AF333388.1 /DEF=Homo sapiens metallothionein 1H-like protein mRNA, complete cds. /FEA=mRNA /PROD=metallothionein 1H-like protein /DB_XREF=gi:13310411 /UG=Hs.326774 Homo sapiens metallothionein 1H-like protein mRNA, complete cds /FL=gb:AF333388.1                                                                 |
| 219922_s_at | 6.91 | gb:NM_021070.1 /DEF=Homo sapiens latent transforming growth factor beta binding protein 3 (LTBP3), mRNA. /FEA=mRNA /GEN=LTBP3 /PROD=latent transforming growth factor beta bindingprotein 3 /DB_XREF=gi:10835104 /UG=Hs.289019 latent transforming growth factor beta binding protein 3 /FL=gb:NM_021070.1 gb:AF135960.2 |
| 201739_at   | 6.84 | gb:NM_005627.1 /DEF=Homo sapiens serumglucocorticoid regulated kinase (SGK), mRNA. /FEA=mRNA /GEN=SGK /PROD=serumglucocorticoid regulated kinase /DB_XREF=gi:5032090 /UG=Hs.296323 serumglucocorticoid regulated kinase /FL=gb:BC001263.1 gb:NM_005627.1 gb:AF153609.1                                                   |
| 206026_s_at | 6.74 | gb:NM_007115.1 /DEF=Homo sapiens tumor necrosis factor, alpha-induced protein 6 (TNFAIP6), mRNA. /FEA=mRNA /GEN=TNFAIP6 /PROD=tumor necrosis factor, alpha-induced protein 6 /DB_XREF=gi:6005905 /UG=Hs.29352 tumor necrosis factor, alpha-induced protein 6 /FL=gb:NM_007115.1                                          |
| 221972_s_at | 6.72 | Consensus includes gb:AL571362 /FEA=EST /DB_XREF=gi:12928582 /DB_XREF=est:AL571362 /CLONE=CS0DI009YD14 (3 prime) /UG=Hs.42806 calcium binding protein Cab45 precursor,                                                                                                                                                   |
| 204115_at   | 6.52 | gb:NM_004126.1 /DEF=Homo sapiens guanine nucleotide binding protein 11 (GNG11), mRNA. /FEA=mRNA /GEN=GNG11 /PROD=guanine nucleotide binding protein 11 /DB_XREF=gi:4758447 /UG=Hs.83381 guanine nucleotide binding protein 11 /FL=gb:NM_004126.1 gb:U31384.1                                                             |
| 213887_s_at | 6.27 | Consensus includes gb:AI554759 /FEA=EST /DB_XREF=gi:4487122 /DB_XREF=est:tn30e02.x1 /CLONE=IMAGE:2169146 /UG=Hs.24301 polymerase (RNA) II (DNA directed) polypeptide E (25kD)                                                                                                                                            |
| 215617_at   | 6.11 | Consensus includes gb:AU145711 /FEA=EST /DB_XREF=gi:11007232 /DB_XREF=est:AU145711 /CLONE=HEMBA1005588 /UG=Hs.301006 Homo sapiens cDNA FLJ11754 fis, clone HEMBA1005588                                                                                                                                                  |
| 221521_s_at | 6.03 | gb:BC003186.1 /DEF=Homo sapiens, HSPC037 protein, clone MGC:673, mRNA, complete cds. /FEA=mRNA /PROD=HSPC037 protein /DB_XREF=gi:13112024 /UG=Hs.108196 HSPC037 protein /FL=gb:BC003186.1 gb:AF201939.1                                                                                                                  |
| 210792_x_at | 5.96 | gb:AF033111.1 /DEF=Homo sapiens Siva-2 mRNA, complete cds. /FEA=mRNA /PROD=Siva-2 /DB_XREF=gi:5737690 /UG=Hs.112058 CD27-binding (Siva) protein /FL=gb:NM_021709.1 gb:AF033111.1                                                                                                                                         |
| 216080_s_at | 5.79 | Consensus includes gb:AC004770 /DEF=Homo sapiens chromosome 11, BAC CIT-HSP-311e8 (BC269730) containing the hFEN1 gene /FEA=CDS_3 /DB_XREF=gi:3212836 /UG=Hs.21765 fatty acid desaturase 3                                                                                                                               |
| 204733_at   | 5.74 | gb:NM_002774.1 /DEF=Homo sapiens kallikrein 6 (neurosin, zyme) (KLK6), mRNA. /FEA=mRNA /GEN=KLK6 /PROD=kallikrein 6 (neurosin, zyme) /DB_XREF=gi:4506154 /UG=Hs.79361 kallikrein 6 (neurosin, zyme) /FL=gb:U62801.1 gb:D78203.1 gb:AF013988.1 gb:NM_002774.1                                                             |

|             |      |                                                                                                                                                                                                                                                                                                                                                                                                                       |
|-------------|------|-----------------------------------------------------------------------------------------------------------------------------------------------------------------------------------------------------------------------------------------------------------------------------------------------------------------------------------------------------------------------------------------------------------------------|
| 209278_s_at | 5.65 | gb:L27624.1 /DEF=Homo sapiens tissue factor pathway inhibitor-2 mRNA, complete cds. /FEA=mRNA /PROD=tissue factor pathway inhibitor-2 /DB_XREF=gi:441149 /UG=Hs.295944 tissue factor pathway inhibitor 2 /FL=gb:BC005330.1 gb:L27624.1 gb:D29992.1 gb:NM_006528.1                                                                                                                                                     |
| 204326_x_at | 5.64 | gb:NM_002450.1 /DEF=Homo sapiens metallothionein 1L (MT1L), mRNA. /FEA=mRNA /GEN=MT1L /PROD=metallothionein 1L /DB_XREF=gi:4505270 /UG=Hs.94360 metallothionein 1L /FL=gb:NM_002450.1                                                                                                                                                                                                                                 |
| 215646_s_at | 5.54 | Consensus includes gb:R94644 /FEA=EST /DB_XREF=gi:970039 /DB_XREF=est:yq42a12.r1 /CLONE=IMAGE:198430 /UG=Hs.306542 Homo sapiens versican Vint isoform, mRNA, partial cds                                                                                                                                                                                                                                              |
| 217165_x_at | 5.5  | Consensus includes gb:M10943 /DEF=Human metallothionein-1f gene (hMT-1f) /FEA=CDS /DB_XREF=gi:187540 /UG=Hs.203936 metallothionein 1F (functional)                                                                                                                                                                                                                                                                    |
| 204748_at   | 5.49 | gb:NM_000963.1 /DEF=Homo sapiens prostaglandin-endoperoxide synthase 2 (prostaglandin GH synthase and cyclooxygenase) (PTGS2), mRNA. /FEA=mRNA /GEN=PTGS2 /PROD=prostaglandin-endoperoxide synthase 2(prostaglandin GH synthase and cyclooxygenase) /DB_XREF=gi:4506264 /UG=Hs.196384 prostaglandin-endoperoxide synthase 2 (prostaglandin GH synthase and cyclooxygenase) /FL=gb:M90100.1 gb:L15326.1 gb:NM_000963.1 |
| 221731_x_at | 5.48 | Consensus includes gb:BF218922 /FEA=EST /DB_XREF=gi:11112418 /DB_XREF=est:601885091F1 /CLONE=IMAGE:4103447 /UG=Hs.81800 chondroitin sulfate proteoglycan 2 (versican)                                                                                                                                                                                                                                                 |
| 204932_at   | 5.45 | Consensus includes gb:BF433902 /FEA=EST /DB_XREF=gi:11446030 /DB_XREF=est:7q56c10.x1 /CLONE=IMAGE:3702163 /UG=Hs.81791 tumor necrosis factor receptor superfamily, member 11b (osteoprotegerin) /FL=gb:U94332.1 gb:AB002146.1 gb:NM_002546.1                                                                                                                                                                          |
| 212764_at   | 5.43 | Consensus includes gb:AI806174 /FEA=EST /DB_XREF=gi:5392740 /DB_XREF=est:wf06h03.x1 /CLONE=IMAGE:2349845 /UG=Hs.232068 transcription factor 8 (represses interleukin 2 expression)                                                                                                                                                                                                                                    |
| 208960_s_at | 5.42 | Consensus includes gb:BE675435 /FEA=EST /DB_XREF=gi:10035976 /DB_XREF=est:7f09a11.x1 /CLONE=IMAGE:3294140 /UG=Hs.285313 core promoter element binding protein /FL=gb:BC000311.1 gb:BC004301.1 gb:AF001461.1 gb:AB017493.1 gb:NM_001300.2                                                                                                                                                                              |
| 212185_x_at | 5.26 | Consensus includes gb:NM_005953.1 /DEF=Homo sapiens metallothionein 2A (MT2A), mRNA. /FEA=CDS /GEN=MT2A /PROD=metallothionein 2A /DB_XREF=gi:5174763 /UG=Hs.118786 metallothionein 2A /FL=gb:NM_005953.1                                                                                                                                                                                                              |
| 204620_s_at | 5.26 | gb:NM_004385.1 /DEF=Homo sapiens chondroitin sulfate proteoglycan 2 (versican) (CSPG2), mRNA. /FEA=mRNA /GEN=CSPG2 /PROD=chondroitin sulfate proteoglycan 2 (versican) /DB_XREF=gi:4758081 /UG=Hs.81800 chondroitin sulfate proteoglycan 2 (versican) /FL=gb:NM_004385.1                                                                                                                                              |
| 218585_s_at | 5.12 | gb:NM_016448.1 /DEF=Homo sapiens L2DTL protein (L2DTL), mRNA. /FEA=mRNA /GEN=L2DTL /PROD=L2DTL protein /DB_XREF=gi:7705575 /UG=Hs.126774 L2DTL protein /FL=gb:AF195765.1 gb:NM_016448.1                                                                                                                                                                                                                               |
| 202855_s_at | 5    | Consensus includes gb:AL513917 /FEA=EST /DB_XREF=gi:12777411 /DB_XREF=est:AL513917 /CLONE=CL0BA006ZD09 (3 prime) /UG=Hs.85838 solute carrier family 16 (monocarboxylic acid transporters), member 3 /FL=gb:U81800.1 gb:NM_004207.1                                                                                                                                                                                    |
| 204584_at   | 4.99 | Consensus includes gb:AI653981 /FEA=EST /DB_XREF=gi:4737960 /DB_XREF=est:ty04c03.x1 /CLONE=IMAGE:2278084 /UG=Hs.1757 L1 cell adhesion molecule (hydrocephalus, stenosis of aqueduct of Sylvius 1, MASA (mental retardation, aphasia, shuffling gait and adducted thumbs) syndrome, spastic paraplegia 1) /FL=gb:NM_024003.1 gb:NM_000425.2 gb:M77640.1 gb:M74387.1                                                    |
| 204775_at   | 4.98 | gb:NM_005441.1 /DEF=Homo sapiens chromatin assembly factor 1, subunit B (p60) (CHAF1B), mRNA. /FEA=mRNA /GEN=CHAF1B /PROD=chromatin assembly factor 1, subunit B (p60) /DB_XREF=gi:4885104 /UG=Hs.75238 chromatin assembly factor 1, subunit B (p60) /FL=gb:NM_005441.1 gb:U20980.1                                                                                                                                   |
| 202779_s_at | 4.95 | gb:NM_014501.1 /DEF=Homo sapiens ubiquitin carrier protein (E2-EPF), mRNA. /FEA=mRNA /GEN=E2-EPF                                                                                                                                                                                                                                                                                                                      |

|             |      |                                                                                                                                                                                                                                                                                                                                       |
|-------------|------|---------------------------------------------------------------------------------------------------------------------------------------------------------------------------------------------------------------------------------------------------------------------------------------------------------------------------------------|
|             |      | /PROD=ubiquitin carrier protein /DB_XREF=gi:7657045 /UG=Hs.174070 ubiquitin carrier protein /FL=gb:M91670.1<br>gb:NM_014501.1                                                                                                                                                                                                         |
| 206461_x_at | 4.84 | gb:NM_005951.1 /DEF=Homo sapiens metallothionein 1H (MT1H), mRNA. /FEA=mRNA /GEN=MT1H<br>/PROD=metallothionein 1H /DB_XREF=gi:10835084 /UG=Hs.2667 metallothionein 1H /FL=gb:NM_005951.1                                                                                                                                              |
| 204338_s_at | 4.8  | gb:NM_005613.2 /DEF=Homo sapiens regulator of G-protein signalling 4 (RGS4), mRNA. /FEA=mRNA<br>/GEN=RGS4 /PROD=regulator of G-protein signaling 4 /DB_XREF=gi:11184227 /UG=Hs.227571 regulator of G-<br>protein signalling 4 /FL=gb:NM_005613.2 gb:BC000737.1                                                                        |
| 222155_s_at | 4.77 | Consensus includes gb:AK021918.1 /DEF=Homo sapiens cDNA FLJ11856 fis, clone HEMBA1006789.<br>/FEA=mRNA /DB_XREF=gi:10433214 /UG=Hs.6459 hypothetical protein FLJ11856                                                                                                                                                                 |
| 214974_x_at | 4.75 | Consensus includes gb:AK026546.1 /DEF=Homo sapiens cDNA: FLJ22893 fis, clone KAT04792. /FEA=mRNA<br>/DB_XREF=gi:10439427 /UG=Hs.287716 Homo sapiens cDNA: FLJ22893 fis, clone KAT04792                                                                                                                                                |
| 219691_at   | 4.74 | gb:NM_017654.1 /DEF=Homo sapiens hypothetical protein FLJ20073 (FLJ20073), mRNA. /FEA=mRNA<br>/GEN=FLJ20073 /PROD=hypothetical protein FLJ20073 /DB_XREF=gi:8923080 /UG=Hs.65641 hypothetical<br>protein FLJ20073 /FL=gb:NM_017654.1                                                                                                  |
| 202326_at   | 4.69 | gb:NM_006709.1 /DEF=Homo sapiens ankyrin repeat-containing protein (G9A), mRNA. /FEA=mRNA /GEN=G9A<br>/PROD=ankyrin repeat-containing protein /DB_XREF=gi:5729833 /UG=Hs.75196 ankyrin repeat-containing protein<br>/FL=gb:BC002686.1 gb:NM_006709.1                                                                                  |
| 204306_s_at | 4.68 | gb:NM_004357.1 /DEF=Homo sapiens CD151 antigen (CD151), mRNA. /FEA=mRNA /GEN=CD151<br>/PROD=CD151 antigen /DB_XREF=gi:4757941 /UG=Hs.75564 CD151 antigen /FL=gb:BC001374.1 gb:D29963.1<br>gb:NM_004357.1 gb:U14650.1                                                                                                                  |
| 219491_at   | 4.57 | gb:NM_024036.1 /DEF=Homo sapiens hypothetical protein MGC3103 (MGC3103), mRNA. /FEA=mRNA<br>/GEN=MGC3103 /PROD=hypothetical protein MGC3103 /DB_XREF=gi:13128987 /UG=Hs.115960 hypothetical<br>protein MGC3103 /FL=gb:BC000207.1 gb:NM_024036.1                                                                                       |
| 208394_x_at | 4.56 | gb:NM_007036.2 /DEF=Homo sapiens endothelial cell-specific molecule 1 (ESM1), mRNA. /FEA=mRNA<br>/GEN=ESM1 /PROD=endothelial cell-specific molecule 1 precursor /DB_XREF=gi:13259505 /UG=Hs.41716<br>endothelial cell-specific molecule 1 /FL=gb:NM_007036.2                                                                          |
| 214240_at   | 4.52 | Consensus includes gb:AL556409 /FEA=EST /DB_XREF=gi:12899058 /DB_XREF=est:AL556409<br>/CLONE=CS0DK004YA08 (5 prime) /UG=Hs.1907 galanin                                                                                                                                                                                               |
| 212242_at   | 4.5  | Consensus includes gb:AL565074 /FEA=EST /DB_XREF=gi:12916087 /DB_XREF=est:AL565074<br>/CLONE=CS0DN003YF20 (3 prime) /UG=Hs.75318 tubulin, alpha 1 (testis specific)                                                                                                                                                                   |
| 204441_s_at | 4.5  | gb:NM_002689.1 /DEF=Homo sapiens polymerase (DNA-directed), alpha (70kD) (POLA2), mRNA. /FEA=mRNA<br>/GEN=POLA2 /PROD=polymerase (DNA-directed), alpha (70kD) /DB_XREF=gi:4505928 /UG=Hs.81942<br>polymerase (DNA-directed), alpha (70kD) /FL=gb:BC001347.1 gb:BC002990.1 gb:L24559.1 gb:NM_002689.1                                  |
| 201373_at   | 4.5  | gb:NM_000445.1 /DEF=Homo sapiens plectin 1, intermediate filament binding protein, 500kD (PLEC1), mRNA.<br>/FEA=mRNA /GEN=PLEC1 /PROD=plectin 1, intermediate filament binding protein, 500kD /DB_XREF=gi:4505876<br>/UG=Hs.79706 plectin 1, intermediate filament binding protein, 500kD /FL=gb:U53204.1 gb:NM_000445.1              |
| 204597_x_at | 4.46 | gb:NM_003155.1 /DEF=Homo sapiens stanniocalcin 1 (STC1), mRNA. /FEA=mRNA /GEN=STC1<br>/PROD=stanniocalcin 1 /DB_XREF=gi:4507264 /UG=Hs.25590 stanniocalcin 1 /FL=gb:U46768.1 gb:U25997.1<br>gb:NM_003155.1                                                                                                                            |
| 203680_at   | 4.42 | gb:NM_002736.1 /DEF=Homo sapiens protein kinase, cAMP-dependent, regulatory, type II, beta (PRKAR2B),<br>mRNA. /FEA=mRNA /GEN=PRKAR2B /PROD=protein kinase, cAMP-dependent, regulatory, type II, beta<br>/DB_XREF=gi:4506064 /UG=Hs.77439 protein kinase, cAMP-dependent, regulatory, type II, beta /FL=gb:M31158.1<br>gb:NM_002736.1 |

|             |      |                                                                                                                                                                                                                                                                                                                                               |
|-------------|------|-----------------------------------------------------------------------------------------------------------------------------------------------------------------------------------------------------------------------------------------------------------------------------------------------------------------------------------------------|
| 218332_at   | 4.41 | gb:NM_018476.1 /DEF=Homo sapiens uncharacterized hypothalamus protein HBEX2 (HBEX2), mRNA. /FEA=mRNA /GEN=HBEX2 /PROD=uncharacterized hypothalamus protein HBEX2 /DB_XREF=gi:8923715 /UG=Hs.283719 uncharacterized hypothalamus protein HBEX2 /FL=gb:AF220189.1 gb:NM_018476.1 gb:AF183416.1 gb:AF237783.1                                    |
| 216250_s_at | 4.39 | Consensus includes gb:X77598.1 /DEF=H.sapiens LAM A3 mRNA for laminin alpha 3 chain. /FEA=mRNA /DB_XREF=gi:9716101 /UG=Hs.83450 laminin, alpha 3 (nicein (150kD), kalinin (165kD), BM600 (150kD), epilegrin)                                                                                                                                  |
| 202917_s_at | 4.38 | gb:NM_002964.2 /DEF=Homo sapiens S100 calcium-binding protein A8 (calgranulin A) (S100A8), mRNA. /FEA=mRNA /GEN=S100A8 /PROD=S100 calcium-binding protein A8 /DB_XREF=gi:9845519 /UG=Hs.100000 S100 calcium-binding protein A8 (calgranulin A) /FL=gb:NM_002964.2                                                                             |
| 209126_x_at | 4.37 | gb:L42612.1 /DEF=Homo sapiens keratin 6 isoform K6f (KRT6F) mRNA, complete cds. /FEA=mRNA /GEN=KRT6F /PROD=keratin type II /DB_XREF=gi:908804 /UG=Hs.111758 keratin 6A /FL=gb:NM_005554.1 gb:L42611.1 gb:L42612.1                                                                                                                             |
| 217716_s_at | 4.35 | gb:NM_013336.1 /DEF=Homo sapiens sec61 homolog (HSEC61), mRNA. /FEA=mRNA /GEN=HSEC61 /PROD=sec61 homolog /DB_XREF=gi:7019414 /UG=Hs.306079 sec61 homolog /FL=gb:BC002951.1 gb:AF346602.1 gb:AF084458.1 gb:NM_013336.1                                                                                                                         |
| 217854_s_at | 4.23 | gb:NM_002695.1 /DEF=Homo sapiens polymerase (RNA) II (DNA directed) polypeptide E (25kD) (POLR2E), mRNA. /FEA=mRNA /GEN=POLR2E /PROD=polymerase (RNA) II (DNA directed) polypeptide E(25kD) /DB_XREF=gi:4505944 /UG=Hs.24301 polymerase (RNA) II (DNA directed) polypeptide E (25kD) /FL=gb:BC004441.1 gb:NM_002695.1 gb:J04965.1 gb:D38251.1 |
| 212141_at   | 4.16 | Consensus includes gb:AA604621 /FEA=EST /DB_XREF=gi:2445485 /DB_XREF=est:no84b08.s1 /CLONE=IMAGE:1113495 /UG=Hs.154443 minichromosome maintenance deficient (S. cerevisiae) 4                                                                                                                                                                 |
| 213746_s_at | 4.14 | Consensus includes gb:AW051856 /FEA=EST /DB_XREF=gi:5914215 /DB_XREF=est:wz04a05.x1 /CLONE=IMAGE:2557040 /UG=Hs.195464 filamin A, alpha (actin-binding protein-280)                                                                                                                                                                           |
| 208750_s_at | 4.14 | Consensus includes gb:AA580004 /FEA=EST /DB_XREF=gi:2355331 /DB_XREF=est:nl79c05.s1 /CLONE=IMAGE:1056872 /UG=Hs.74571 ADP-ribosylation factor 1 /FL=gb:M84326.1 gb:M36340.1 gb:AF055002.1 gb:AF052179.1 gb:NM_001658.2                                                                                                                        |
| 204745_x_at | 4.14 | gb:NM_005950.1 /DEF=Homo sapiens metallothionein 1G (MT1G), mRNA. /FEA=mRNA /GEN=MT1G /PROD=metallothionein 1G /DB_XREF=gi:10835229 /UG=Hs.173451 metallothionein 1G /FL=gb:NM_005950.1                                                                                                                                                       |
| 201508_at   | 4.12 | gb:NM_001552.1 /DEF=Homo sapiens insulin-like growth factor-binding protein 4 (IGFBP4), mRNA. /FEA=mRNA /GEN=IGFBP4 /PROD=insulin-like growth factor-binding protein 4 /DB_XREF=gi:10835020 /UG=Hs.1516 insulin-like growth factor-binding protein 4 /FL=gb:NM_001552.1 gb:M62403.1                                                           |
| 213680_at   | 4.12 | Consensus includes gb:A1831452 /FEA=EST /DB_XREF=gi:5452123 /DB_XREF=est:wj49b03.x1 /CLONE=IMAGE:2406125 /UG=Hs.111758 keratin 6A                                                                                                                                                                                                             |
| 209589_s_at | 4.1  | gb:AF025304.1 /DEF=Homo sapiens protein-tyrosine kinase EPHB2v (EPHB2) mRNA, complete cds. /FEA=mRNA /GEN=EPHB2 /PROD=protein-tyrosine kinase EPHB2v /DB_XREF=gi:2739055 /UG=Hs.125124 EphB2 /FL=gb:AF025304.1                                                                                                                                |
| 201482_at   | 4.08 | gb:NM_002826.2 /DEF=Homo sapiens quiescin Q6 (QSCN6), mRNA. /FEA=mRNA /GEN=QSCN6 /PROD=quiescin Q6 /DB_XREF=gi:13325074 /UG=Hs.77266 quiescin Q6 /FL=gb:L42379.1 gb:U97276.2 gb:NM_002826.2                                                                                                                                                   |
| 202338_at   | 4.01 | gb:NM_003258.1 /DEF=Homo sapiens thymidine kinase 1, soluble (TK1), mRNA. /FEA=mRNA /GEN=TK1 /PROD=thymidine kinase 1, soluble /DB_XREF=gi:4507518 /UG=Hs.105097 thymidine kinase 1, soluble /FL=gb:K02581.1 gb:NM_003258.1                                                                                                                   |
| 222162_s_at | 3.99 | Consensus includes gb:AK023795.1 /DEF=Homo sapiens cDNA FLJ13733 fis, clone PLACE3000147, highly                                                                                                                                                                                                                                              |

similar to Homo sapiens metalloproteinase with thrombospondin type 1 motifs ADAMTS1 (ADAMTS1) mRNA. /FEA=mRNA /DB\_XREF=gi:10435838 /UG=Hs.8230 a disintegrin-like and metalloprotease (reprolysin type) with thrombospondin type 1 motif, 1

204070\_at 3.91 gb:NM\_004585.2 /DEF=Homo sapiens retinoic acid receptor responder (tazarotene induced) 3 (RARRES3), mRNA. /FEA=mRNA /GEN=RARRES3 /PROD=retinoic acid receptor responder (tazaroteneinduced) 3 /DB\_XREF=gi:8051633 /UG=Hs.17466 retinoic acid receptor responder (tazarotene induced) 3 /FL=gb:AF060228.1 gb:AF092922.1 gb:NM\_004585.2 gb:AB030815.1

204595\_s\_at 3.89 Consensus includes gb:AI300520 /FEA=EST /DB\_XREF=gi:3959866 /DB\_XREF=est:qn55e06.x1 /CLONE=IMAGE:1902178 /UG=Hs.25590 stanniocalcin 1 /FL=gb:U46768.1 gb:U25997.1 gb:NM\_003155.1

32209\_at 3.89 Cluster Incl. AF052151:Homo sapiens clone 24574 mRNA sequence /cds=UNKNOWN /gb=AF052151 /gi=3360461 /ug=Hs.18686 /len=1337

202856\_s\_at 3.88 gb:NM\_004207.1 /DEF=Homo sapiens solute carrier family 16 (monocarboxylic acid transporters), member 3 (SLC16A3), mRNA. /FEA=mRNA /GEN=SLC16A3 /PROD=solute carrier family 16 (monocarboxylic acidtransporters), member 3 /DB\_XREF=gi:4759111 /UG=Hs.85838 solute carrier family 16 (monocarboxylic acid transporters), member 3 /FL=gb:U81800.1 gb:NM\_004207.1

202154\_x\_at 3.88 gb:NM\_006086.1 /DEF=Homo sapiens tubulin, beta, 4 (TUBB4), mRNA. /FEA=mRNA /GEN=TUBB4 /PROD=tubulin, beta, 4 /DB\_XREF=gi:5174736 /UG=Hs.159154 tubulin, beta, 4 /FL=gb:BC000748.1 gb:U47634.1 gb:NM\_006086.1

208937\_s\_at 3.86 gb:D13889.1 /DEF=Human mRNA for Id-1H, complete cds. /FEA=mRNA /GEN=Id-1H /PROD=Id-1H /DB\_XREF=gi:464181 /UG=Hs.75424 inhibitor of DNA binding 1, dominant negative helix-loop-helix protein /FL=gb:BC000613.1 gb:NM\_002165.1 gb:D13889.1

203851\_at 3.85 gb:NM\_002178.1 /DEF=Homo sapiens insulin-like growth factor binding protein 6 (IGFBP6), mRNA. /FEA=mRNA /GEN=IGFBP6 /PROD=insulin-like growth factor binding protein 6 /DB\_XREF=gi:11321592 /UG=Hs.274313 insulin-like growth factor binding protein 6 /FL=gb:NM\_002178.1 gb:BC003507.1 gb:BC005007.1 gb:M62402.1

212551\_at 3.84 Consensus includes gb:NM\_006366.1 /DEF=Homo sapiens adenylyl cyclase-associated protein 2 (CAP2), mRNA. /FEA=CDS /GEN=CAP2 /PROD=adenylyl cyclase-associated protein 2 /DB\_XREF=gi:5453592 /UG=Hs.296341 adenylyl cyclase-associated protein 2 /FL=gb:U02390.1 gb:NM\_006366.1

201841\_s\_at 3.82 gb:NM\_001540.2 /DEF=Homo sapiens heat shock 27kD protein 1 (HSPB1), mRNA. /FEA=mRNA /GEN=HSPB1 /PROD=heat shock 27kD protein 1 /DB\_XREF=gi:4996892 /UG=Hs.76067 heat shock 27kD protein 1 /FL=gb:AB020027.1 gb:BC000510.1 gb:U90906.1 gb:NM\_001540.2

203137\_at 3.81 gb:NM\_004906.1 /DEF=Homo sapiens Wilms tumour 1-associating protein (KIAA0105), mRNA. /FEA=mRNA /GEN=KIAA0105 /PROD=Wilms tumour 1-associating protein /DB\_XREF=gi:4758635 /UG=Hs.119 Wilms tumour 1-associating protein /FL=gb:AF277190.1 gb:D14661.1 gb:NM\_004906.1

200859\_x\_at 3.8 gb:NM\_001456.1 /DEF=Homo sapiens filamin A, alpha (actin-binding protein-280) (FLNA), mRNA. /FEA=mRNA /GEN=FLNA /PROD=filamin 1 (actin-binding protein-280) /DB\_XREF=gi:4503744 /UG=Hs.195464 filamin A, alpha (actin-binding protein-280) /FL=gb:NM\_001456.1

203489\_at 3.79 gb:NM\_006427.2 /DEF=Homo sapiens CD27-binding (Siva) protein (SIVA), transcript variant 1, mRNA. /FEA=mRNA /GEN=SIVA /PROD=CD27-binding (Siva) protein isoform 1 /DB\_XREF=gi:11277467 /UG=Hs.112058 CD27-binding (Siva) protein /FL=gb:NM\_006427.2 gb:U82938.1

211501\_s\_at 3.77 gb:BC001173.1 /DEF=Homo sapiens, eukaryotic translation initiation factor 3, subunit 9 (eta, 116kD), clone MGC:2051, mRNA, complete cds. /FEA=mRNA /PROD=eukaryotic translation initiation factor 3,subunit 9 (eta, 116kD) /DB\_XREF=gi:12654668 /UG=Hs.57783 eukaryotic translation initiation factor 3, subunit 9 (eta, 116kD) /FL=gb:BC001173.1



|             |      |                                                                                                                                                                                                                                                                                                                                             |
|-------------|------|---------------------------------------------------------------------------------------------------------------------------------------------------------------------------------------------------------------------------------------------------------------------------------------------------------------------------------------------|
| 215223_s_at | 3.76 | Consensus includes gb:W46388 /FEA=EST /DB_XREF=gi:1331076 /DB_XREF=est:zc32c08.s1 /CLONE=IMAGE:324014 /UG=Hs.318885 superoxide dismutase 2, mitochondrial                                                                                                                                                                                   |
| 209773_s_at | 3.75 | gb:BC001886.1 /DEF=Homo sapiens, ribonucleotide reductase M2 polypeptide, clone MGC:1551, mRNA, complete cds. /FEA=mRNA /PROD=ribonucleotide reductase M2 polypeptide /DB_XREF=gi:12804874 /UG=Hs.75319 ribonucleotide reductase M2 polypeptide /FL=gb:BC001886.1                                                                           |
| 203889_at   | 3.74 | gb:NM_003020.1 /DEF=Homo sapiens secretory granule, neuroendocrine protein 1 (7B2 protein) (SGNE1), mRNA. /FEA=mRNA /GEN=SGNE1 /PROD=secretory granule, neuroendocrine protein 1 (7B2protein) /DB_XREF=gi:4506916 /UG=Hs.2265 secretory granule, neuroendocrine protein 1 (7B2 protein) /FL=gb:BC005349.1 gb:NM_003020.1                    |
| 213524_s_at | 3.74 | Consensus includes gb:NM_015714.1 /DEF=Homo sapiens putative lymphocyte G0G1 switch gene (G0S2), mRNA. /FEA=CDS /GEN=G0S2 /PROD=putative lymphocyte G0G1 switch gene /DB_XREF=gi:7657103 /UG=Hs.95910 putative lymphocyte G0G1 switch gene /FL=gb:NM_015714.1                                                                               |
| 222037_at   | 3.73 | Consensus includes gb:A1859865 /FEA=EST /DB_XREF=gi:5513481 /DB_XREF=est:wm21f03.x1 /CLONE=IMAGE:2436605 /UG=Hs.154443 minichromosome maintenance deficient (S. cerevisiae) 4                                                                                                                                                               |
| 200613_at   | 3.72 | gb:NM_004068.1 /DEF=Homo sapiens adaptor-related protein complex 2, mu 1 subunit (AP2M1), mRNA. /FEA=mRNA /GEN=AP2M1 /PROD=adaptor-related protein complex 2, mu 1 subunit /DB_XREF=gi:4757993 /UG=Hs.152936 adaptor-related protein complex 2, mu 1 subunit /FL=gb:U36188.1 gb:BC004996.1 gb:D63475.1 gb:NM_004068.1                       |
| 221269_s_at | 3.71 | gb:NM_031286.1 /DEF=Homo sapiens SH3BGRL3-like protein (SH3BGRL3), mRNA. /FEA=mRNA /GEN=SH3BGRL3 /PROD=SH3BGRL3-like protein /DB_XREF=gi:13775197 /FL=gb:NM_031286.1                                                                                                                                                                        |
| 211730_s_at | 3.7  | gb:BC005903.1 /DEF=Homo sapiens, polymerase (RNA) II (DNA directed) polypeptide L (7.6kD), clone MGC:14494, mRNA, complete cds. /FEA=mRNA /PROD=polymerase (RNA) II (DNA directed) polypeptide L(7.6kD) /DB_XREF=gi:13543491 /FL=gb:BC005903.1                                                                                              |
| 214321_at   | 3.67 | Consensus includes gb:BF440025 /FEA=EST /DB_XREF=gi:11452542 /DB_XREF=est:nac52c12.x1 /CLONE=IMAGE:3406079 /UG=Hs.235935 nephroblastoma overexpressed gene                                                                                                                                                                                  |
| 217784_at   | 3.65 | Consensus includes gb:BE384482 /FEA=EST /DB_XREF=gi:9329847 /DB_XREF=est:601277836F1 /CLONE=IMAGE:3618848 /UG=Hs.296244 SNARE protein /FL=gb:U95735.1 gb:NM_006555.1                                                                                                                                                                        |
| 205798_at   | 3.64 | gb:NM_002185.1 /DEF=Homo sapiens interleukin 7 receptor (IL7R), mRNA. /FEA=mRNA /GEN=IL7R /PROD=interleukin 7 receptor /DB_XREF=gi:4504678 /UG=Hs.237868 interleukin 7 receptor /FL=gb:M29696.1 gb:NM_002185.1                                                                                                                              |
| 212983_at   | 3.63 | Consensus includes gb:NM_005343.1 /DEF=Homo sapiens v-Ha-ras Harvey rat sarcoma viral oncogene homolog (HRAS), mRNA. /FEA=CDS /GEN=HRAS /PROD=v-Ha-ras Harvey rat sarcoma viral oncogenehomolog /DB_XREF=gi:4885424 /UG=Hs.37003 v-Ha-ras Harvey rat sarcoma viral oncogene homolog /FL=gb:NM_005343.1                                      |
| 212691_at   | 3.63 | Consensus includes gb:AW131863 /FEA=EST /DB_XREF=gi:6133470 /DB_XREF=est:xf35f02.x1 /CLONE=IMAGE:2620059 /UG=Hs.30002 SH3-containing protein SH3GLB2                                                                                                                                                                                        |
| 215464_s_at | 3.6  | Consensus includes gb:AK001327.1 /DEF=Homo sapiens cDNA FLJ10465 fis, clone NT2RP1001616. /FEA=mRNA /DB_XREF=gi:7022515 /UG=Hs.12956 Tax interaction protein 1                                                                                                                                                                              |
| 202269_x_at | 3.6  | gb:BC002666.1 /DEF=Homo sapiens, guanylate binding protein 1, interferon-inducible, 67kD, clone MGC:3949, mRNA, complete cds. /FEA=mRNA /PROD=guanylate binding protein 1,interferon-inducible, 67kD /DB_XREF=gi:12803662 /UG=Hs.62661 guanylate binding protein 1, interferon-inducible, 67kD /FL=gb:BC002666.1 gb:M55542.1 gb:NM_002053.1 |
| 217875_s_at | 3.56 | gb:NM_020182.1 /DEF=Homo sapiens transmembrane, prostate androgen induced RNA (TMEPAI), mRNA.                                                                                                                                                                                                                                               |

|                                         |      |                                                                                                                                                                                                                                                                                                                                                                                                                                                                                                                                         |
|-----------------------------------------|------|-----------------------------------------------------------------------------------------------------------------------------------------------------------------------------------------------------------------------------------------------------------------------------------------------------------------------------------------------------------------------------------------------------------------------------------------------------------------------------------------------------------------------------------------|
|                                         |      | /FEA=mRNA /GEN=TMEPAI /PROD=transmembrane, prostate androgen induced RNA /DB_XREF=gi:9910497 /UG=Hs.83883 transmembrane, prostate androgen induced RNA /FL=gb:AF224278.1 gb:NM_020182.1                                                                                                                                                                                                                                                                                                                                                 |
| 204501_at                               | 3.56 | gb:NM_002514.1 /DEF=Homo sapiens nephroblastoma overexpressed gene (NOV), mRNA. /FEA=mRNA /GEN=NOV /PROD=nephroblastoma overexpressed gene /DB_XREF=gi:4505422 /UG=Hs.235935 nephroblastoma overexpressed gene /FL=gb:NM_002514.1                                                                                                                                                                                                                                                                                                       |
| AFFX-r2-<br>Hs28SrRNA-3_at<br>209732_at | 3.53 | M11167 Human 28S rRNA sequence, length 5025 bases, middle target bases 1666-3330                                                                                                                                                                                                                                                                                                                                                                                                                                                        |
|                                         | 3.53 | gb:BC005254.1 /DEF=Homo sapiens, Similar to C-type (calcium dependent, carbohydrate-recognition domain) lectin, superfamily member 2 (activation-induced), clone MGC:12289, mRNA, complete cds. /FEA=mRNA /PROD=Similar to C-type (calcium dependent, carbohydrate-recognition domain) lectin, superfamily member 2 (activation-induced) /DB_XREF=gi:13528920 /UG=Hs.85201 C-type (calcium dependent, carbohydrate-recognition domain) lectin, superfamily member 2 (activation-induced) /FL=gb:BC005254.1 gb:AB015628.1 gb:NM_005127.1 |
| 218083_at                               | 3.52 | gb:NM_025072.1 /DEF=Homo sapiens hypothetical protein FLJ14038 (FLJ14038), mRNA. /FEA=mRNA /GEN=FLJ14038 /PROD=hypothetical protein FLJ14038 /DB_XREF=gi:13376616 /UG=Hs.288102 hypothetical protein FLJ14038 /FL=gb:NM_025072.1                                                                                                                                                                                                                                                                                                        |
| 202589_at                               | 3.51 | gb:NM_001071.1 /DEF=Homo sapiens thymidylate synthetase (TYMS), mRNA. /FEA=mRNA /GEN=TYMS /PROD=thymidylate synthetase /DB_XREF=gi:4507750 /UG=Hs.82962 thymidylate synthetase /FL=gb:BC002567.1 gb:NM_001071.1                                                                                                                                                                                                                                                                                                                         |
| 212680_x_at                             | 3.5  | Consensus includes gb:BE305165 /FEA=EST /DB_XREF=gi:9177184 /DB_XREF=est:601186685T1 /CLONE=IMAGE:2959580 /UG=Hs.100623 phospholipase C, beta 3, neighbor pseudogene                                                                                                                                                                                                                                                                                                                                                                    |
| 212218_s_at                             | 3.44 | Consensus includes gb:AI954041 /FEA=EST /DB_XREF=gi:5746351 /DB_XREF=est:wx78h04.x1 /CLONE=IMAGE:2549815 /UG=Hs.11050 F-box only protein 9 /FL=gb:NM_012347.1                                                                                                                                                                                                                                                                                                                                                                           |
| 203571_s_at                             | 3.43 | gb:NM_006829.1 /DEF=Homo sapiens adipose specific 2 (APM2), mRNA. /FEA=mRNA /GEN=APM2 /PROD=adipose specific 2 /DB_XREF=gi:5802975 /UG=Hs.74120 adipose specific 2 /FL=gb:BC004471.1 gb:NM_006829.1 gb:D45370.1                                                                                                                                                                                                                                                                                                                         |
| 204141_at                               | 3.42 | gb:NM_001069.1 /DEF=Homo sapiens tubulin, beta polypeptide (TUBB), mRNA. /FEA=mRNA /GEN=TUBB /PROD=tubulin, beta polypeptide /DB_XREF=gi:4507728 /UG=Hs.179661 tubulin, beta polypeptide /FL=gb:BC001194.1 gb:NM_001069.1                                                                                                                                                                                                                                                                                                               |
| 201264_at                               | 3.42 | gb:NM_007263.1 /DEF=Homo sapiens coatomer protein complex, subunit epsilon (COPE), mRNA. /FEA=mRNA /GEN=COPE /PROD=coatomer protein complex, subunit epsilon /DB_XREF=gi:6005734 /UG=Hs.10326 coatomer protein complex, subunit epsilon /FL=gb:AL136928.1 gb:BC003155.1 gb:NM_007263.1                                                                                                                                                                                                                                                  |
| 205207_at                               | 3.42 | gb:NM_000600.1 /DEF=Homo sapiens interleukin 6 (interferon, beta 2) (IL6), mRNA. /FEA=mRNA /GEN=IL6 /PROD=interleukin 6 (interferon, beta 2) /DB_XREF=gi:10834983 /UG=Hs.93913 interleukin 6 (interferon, beta 2) /FL=gb:NM_000600.1 gb:M14584.1 gb:M18403.1 gb:M29150.1 gb:M54894.1                                                                                                                                                                                                                                                    |
| 202644_s_at                             | 3.41 | gb:NM_006290.1 /DEF=Homo sapiens tumor necrosis factor, alpha-induced protein 3 (TNFAIP3), mRNA. /FEA=mRNA /GEN=TNFAIP3 /PROD=tumor necrosis factor, alpha-induced protein 3 /DB_XREF=gi:5454131 /UG=Hs.211600 tumor necrosis factor, alpha-induced protein 3 /FL=gb:M59465.1 gb:NM_006290.1                                                                                                                                                                                                                                            |
| 209427_at                               | 3.41 | gb:AF064238.3 /DEF=Homo sapiens smoothelin large isoform L2 (SMTN) mRNA, complete cds. /FEA=mRNA /GEN=SMTN /PROD=smoothelin large isoform L2 /DB_XREF=gi:8119287 /UG=Hs.149098 smoothelin /FL=gb:AF064238.3                                                                                                                                                                                                                                                                                                                             |
| 201040_at                               | 3.41 | gb:NM_002070.1 /DEF=Homo sapiens guanine nucleotide binding protein (G protein), alpha inhibiting activity polypeptide 2 (GNAI2), mRNA. /FEA=mRNA /GEN=GNAI2 /PROD=guanine nucleotide binding protein (G protein), alpha inhibiting activity polypeptide 2 /DB_XREF=gi:4504040 /UG=Hs.77269 guanine nucleotide binding                                                                                                                                                                                                                  |

|             |      |                                                                                                                                                                                                                                                                                                                                                                                                                                                                              |
|-------------|------|------------------------------------------------------------------------------------------------------------------------------------------------------------------------------------------------------------------------------------------------------------------------------------------------------------------------------------------------------------------------------------------------------------------------------------------------------------------------------|
| 206421_s_at | 3.4  | protein (G protein), alpha inhibiting activity polypeptide 2 /FL=gb:J03004.1 gb:NM_002070.1<br>gb:NM_003784.1 /DEF=Homo sapiens serine (or cysteine) proteinase inhibitor, clade B (ovalbumin), member 7 (SERPINB7), mRNA. /FEA=mRNA /GEN=SERPINB7 /PROD=serine (or cysteine) proteinase inhibitor, cladeB (ovalbumin), member 7 /DB_XREF=gi:4505148 /UG=Hs.138202 serine (or cysteine) proteinase inhibitor, clade B (ovalbumin), member 7 /FL=gb:AF027866.1 gb:NM_003784.1 |
| 214146_s_at | 3.4  | Consensus includes gb:R64130 /FEA=EST /DB_XREF=gi:836009 /DB_XREF=est:yi18h03.s1<br>/CLONE=IMAGE:139637 /UG=Hs.2164 pro-platelet basic protein (includes platelet basic protein, beta-thromboglobulin, connective tissue-activating peptide III, neutrophil-activating peptide-2)                                                                                                                                                                                            |
| 217025_s_at | 3.4  | Consensus includes gb:AL110225.1 /DEF=Homo sapiens mRNA; cDNA DKFZp434D064 (from clone DKFZp434D064); partial cds. /FEA=mRNA /GEN=DKFZp434D064 /PROD=hypothetical protein<br>/DB_XREF=gi:5817161 /UG=Hs.89434 drebrin 1                                                                                                                                                                                                                                                      |
| 214752_x_at | 3.39 | Consensus includes gb:A1625550 /FEA=EST /DB_XREF=gi:4650481 /DB_XREF=est:ty57d06.x1<br>/CLONE=IMAGE:2283179 /UG=Hs.195464 filamin A, alpha (actin-binding protein-280)                                                                                                                                                                                                                                                                                                       |
| 1861_at     | 3.39 | U66879 /FEATURE= /DEFINITION=HSU66879 Human Bcl-2 binding component 6 (bbc6) mRNA, complete cds                                                                                                                                                                                                                                                                                                                                                                              |
| 211906_s_at | 3.37 | gb:AB046400.1 /DEF=Homo sapiens mRNA for SCCA2b, complete cds. /FEA=CDS /GEN=SCCA2<br>/PROD=SCCA2b /DB_XREF=gi:13537193 /FL=gb:AB046400.1                                                                                                                                                                                                                                                                                                                                    |
| 212977_at   | 3.37 | Consensus includes gb:A1817041 /FEA=EST /DB_XREF=gi:5436120 /DB_XREF=est:wj76c06.x1<br>/CLONE=IMAGE:2408746 /UG=Hs.23016 G protein-coupled receptor                                                                                                                                                                                                                                                                                                                          |
| 221805_at   | 3.35 | Consensus includes gb:AL537457 /FEA=EST /DB_XREF=gi:12800950 /DB_XREF=est:AL537457<br>/CLONE=CS0DF025YH07 (3 prime) /UG=Hs.211584 neurofilament, light polypeptide (68kD) /FL=gb:NM_006158.1                                                                                                                                                                                                                                                                                 |
| 212877_at   | 3.33 | Consensus includes gb:AA284075 /FEA=EST /DB_XREF=gi:1928356 /DB_XREF=est:zs49b01.s1<br>/CLONE=IMAGE:700777 /UG=Hs.117977 kinesin 2 (60-70kD)                                                                                                                                                                                                                                                                                                                                 |
| 210285_x_at | 3.32 | gb:BC000383.1 /DEF=Homo sapiens, Wilms tumour 1-associating protein, clone MGC:8419, mRNA, complete cds.<br>/FEA=mRNA /PROD=Wilms tumour 1-associating protein /DB_XREF=gi:12653228 /UG=Hs.119 Wilms tumour 1-associating protein /FL=gb:BC000383.1 gb:BC004432.1                                                                                                                                                                                                            |
| 203252_at   | 3.32 | gb:NM_005851.1 /DEF=Homo sapiens tumor suppressor deleted in oral cancer-related 1 (DOC-1R), mRNA.<br>/FEA=mRNA /GEN=DOC-1R /PROD=tumor suppressor deleted in oral cancer-related1 /DB_XREF=gi:5031668 /UG=Hs.25664 tumor suppressor deleted in oral cancer-related 1 /FL=gb:BC002850.1 gb:AF089814.1<br>gb:NM_005851.1                                                                                                                                                      |
| 209720_s_at | 3.31 | gb:BC005224.1 /DEF=Homo sapiens, serine (or cysteine) proteinase inhibitor, clade B (ovalbumin), member 3, clone MGC:12244, mRNA, complete cds. /FEA=mRNA /PROD=serine (or cysteine) proteinase inhibitor, cladeB (ovalbumin), member 3 /DB_XREF=gi:13528851 /UG=Hs.227948 serine (or cysteine) proteinase inhibitor, clade B (ovalbumin), member 3 /FL=gb:U19556.1 gb:BC005224.1 gb:NM_006919.1                                                                             |
| 212540_at   | 3.3  | Consensus includes gb:BG476661 /FEA=EST /DB_XREF=gi:13408940 /DB_XREF=est:602524946F1<br>/CLONE=IMAGE:4643458 /UG=Hs.76932 cell division cycle 34                                                                                                                                                                                                                                                                                                                            |
| 202107_s_at | 3.3  | gb:NM_004526.1 /DEF=Homo sapiens minichromosome maintenance deficient (S. cerevisiae) 2 (mitotin) (MCM2), mRNA. /FEA=mRNA /GEN=MCM2 /PROD=minichromosome maintenance deficient (S.cerevisiae) 2 (mitotin)<br>/DB_XREF=gi:4758705 /UG=Hs.57101 minichromosome maintenance deficient (S. cerevisiae) 2 (mitotin)<br>/FL=gb:D83987.1 gb:NM_004526.1                                                                                                                             |
| 216952_s_at | 3.29 | Consensus includes gb:M94363 /DEF=Human lamin B2 (LAMB2) gene and ppv1 gene sequence /FEA=mRNA<br>/DB_XREF=gi:186920 /UG=Hs.76084 lamin B2                                                                                                                                                                                                                                                                                                                                   |
| 204767_s_at | 3.27 | gb:BC000323.1 /DEF=Homo sapiens, flap structure-specific endonuclease 1, clone MGC:8478, mRNA, complete cds. /FEA=mRNA /PROD=flap structure-specific endonuclease 1 /DB_XREF=gi:12653112 /UG=Hs.4756 flap                                                                                                                                                                                                                                                                    |

|             |      |                                                                                                                                                                                                                                                                                                        |
|-------------|------|--------------------------------------------------------------------------------------------------------------------------------------------------------------------------------------------------------------------------------------------------------------------------------------------------------|
| 201890_at   | 3.27 | structure-specific endonuclease 1 /FL=gb:BC000323.1 gb:NM_004111.3<br>Consensus includes gb:BE966236 /FEA=EST /DB_XREF=gi:11771437 /DB_XREF=est:601660172R1<br>/CLONE=IMAGE:3905920 /UG=Hs.75319 ribonucleotide reductase M2 polypeptide /FL=gb:NM_001034.1                                            |
| 216237_s_at | 3.26 | Consensus includes gb:AA807529 /FEA=EST /DB_XREF=gi:2875596 /DB_XREF=est:ob92c07.s1<br>/CLONE=IMAGE:1338828 /UG=Hs.77171 minichromosome maintenance deficient (S. cerevisiae) 5 (cell division<br>cycle 46)                                                                                            |
| 212188_at   | 3.26 | Consensus includes gb:AA551075 /FEA=EST /DB_XREF=gi:2321327 /DB_XREF=est:nk74h06.s1<br>/CLONE=IMAGE:1019291 /UG=Hs.109438 Homo sapiens clone 24775 mRNA sequence                                                                                                                                       |
| 217782_s_at | 3.25 | gb:NM_004127.3 /DEF=Homo sapiens G protein pathway suppressor 1 (GPS1), mRNA. /FEA=mRNA /GEN=GPS1<br>/PROD=G protein pathway suppressor 1 /DB_XREF=gi:13435380 /UG=Hs.268530 G protein pathway suppressor 1<br>/FL=gb:BC000155.1 gb:NM_004127.3 gb:U20285.2                                            |
| 218952_at   | 3.23 | gb:NM_013271.1 /DEF=Homo sapiens granin-like neuroendocrine peptide precursor (SAAS), mRNA. /FEA=mRNA<br>/GEN=SAAS /PROD=granin-like neuroendocrine peptide precursor /DB_XREF=gi:7019518 /UG=Hs.256311<br>granin-like neuroendocrine peptide precursor /FL=gb:BC002851.1 gb:AF181562.1 gb:NM_013271.1 |
| 205681_at   | 3.22 | gb:NM_004049.1 /DEF=Homo sapiens BCL2-related protein A1 (BCL2A1), mRNA. /FEA=mRNA /GEN=BCL2A1<br>/PROD=BCL2-related protein A1 /DB_XREF=gi:4757839 /UG=Hs.227817 BCL2-related protein A1<br>/FL=gb:U27467.1 gb:U29680.1 gb:NM_004049.1                                                                |
| 204337_at   | 3.21 | Consensus includes gb:AL514445 /FEA=EST /DB_XREF=gi:12777939 /DB_XREF=est:AL514445<br>/CLONE=CL0BB010ZF08 (3 prime) /UG=Hs.227571 regulator of G-protein signalling 4 /FL=gb:NM_005613.2<br>gb:BC000737.1                                                                                              |
| 208782_at   | 3.21 | gb:BC000055.1 /DEF=Homo sapiens, follistatin-like 1, clone MGC:1993, mRNA, complete cds. /FEA=mRNA<br>/PROD=follistatin-like 1 /DB_XREF=gi:12652618 /UG=Hs.296267 follistatin-like 1 /FL=gb:BC000055.1 gb:U06863.1                                                                                     |
| 202912_at   | 3.2  | gb:NM_001124.1 /DEF=Homo sapiens adrenomedullin (ADM), mRNA. /FEA=mRNA /GEN=ADM<br>/PROD=adrenomedullin /DB_XREF=gi:4501944 /UG=Hs.394 adrenomedullin /FL=gb:NM_001124.1 gb:D14874.1                                                                                                                   |
| 203967_at   | 3.2  | gb:U77949.1 /DEF=Human Cdc6-related protein (HsCDC6) mRNA, complete cds. /FEA=mRNA /GEN=HsCDC6<br>/PROD=Cdc6-related protein /DB_XREF=gi:1684902 /UG=Hs.69563 CDC6 (cell division cycle 6, S. cerevisiae)<br>homolog /FL=gb:U77949.1 gb:AF022109.1 gb:NM_001254.1                                      |
| 216442_x_at | 3.19 | Consensus includes gb:AK026737.1 /DEF=Homo sapiens cDNA: FLJ23084 fis, clone LNG06602, highly similar to<br>HSFIB1 Human mRNA for fibronectin (FN precursor). /FEA=mRNA /DB_XREF=gi:10439658 /UG=Hs.287820<br>fibronectin 1                                                                            |
| 205082_s_at | 3.18 | gb:AB046692.1 /DEF=Homo sapiens hAO mRNA for aldehyde oxidase, complete cds. /FEA=mRNA /GEN=hAO<br>/PROD=aldehyde oxidase /DB_XREF=gi:13516378 /UG=Hs.174151 aldehyde oxidase 1 /FL=gb:AB046692.1<br>gb:L11005.1 gb:NM_001159.2                                                                        |
| 209277_at   | 3.18 | Consensus includes gb:AL574096 /FEA=EST /DB_XREF=gi:12933969 /DB_XREF=est:AL574096<br>/CLONE=CS0DI040Y117 (3 prime) /UG=Hs.295944 tissue factor pathway inhibitor 2 /FL=gb:BC005330.1<br>gb:L27624.1 gb:D29992.1 gb:NM_006528.1                                                                        |
| 205034_at   | 3.17 | gb:NM_004702.1 /DEF=Homo sapiens cyclin E2 (CCNE2), mRNA. /FEA=mRNA /GEN=CCNE2 /PROD=cyclin E2<br>/DB_XREF=gi:4757931 /UG=Hs.30464 cyclin E2 /FL=gb:AF091433.1 gb:AF102778.1 gb:AF106690.1<br>gb:NM_004702.1                                                                                           |
| 209026_x_at | 3.17 | gb:AF141349.1 /DEF=Homo sapiens beta-tubulin mRNA, complete cds. /FEA=mRNA /PROD=beta-tubulin<br>/DB_XREF=gi:4929137 /UG=Hs.179661 tubulin, beta polypeptide /FL=gb:BC000222.1 gb:BC002347.1<br>gb:BC001938.1 gb:AF070561.1 gb:AF070593.1 gb:AF070600.1 gb:AF141349.1                                  |
| 206924_at   | 3.15 | gb:NM_000641.1 /DEF=Homo sapiens interleukin 11 (IL11), mRNA. /FEA=mRNA /GEN=IL11 /PROD=interleukin                                                                                                                                                                                                    |

|             |      |                                                                                                                                                                                                                                                                                                                                                                                                                  |
|-------------|------|------------------------------------------------------------------------------------------------------------------------------------------------------------------------------------------------------------------------------------------------------------------------------------------------------------------------------------------------------------------------------------------------------------------|
| 205024_s_at | 3.15 | 11 /DB_XREF=gi:10834993 /UG=Hs.1721 interleukin 11 /FL=gb:NM_000641.1 gb:M57765.1<br>gb:NM_002875.1 /DEF=Homo sapiens RAD51 (S. cerevisiae) homolog (E coli RecA homolog) (RAD51), mRNA.<br>/FEA=mRNA /GEN=RAD51 /PROD=RAD51 (S. cerevisiae) homolog (E coli RecA homolog) /DB_XREF=gi:4506388<br>/UG=Hs.23044 RAD51 (S. cerevisiae) homolog (E coli RecA homolog) /FL=gb:D14134.1 gb:D13804.1<br>gb:NM_002875.1 |
| 218695_at   | 3.14 | gb:NM_019037.1 /DEF=Homo sapiens hypothetical protein (FLJ20591), mRNA. /FEA=mRNA /GEN=FLJ20591<br>/PROD=hypothetical protein /DB_XREF=gi:9506688 /UG=Hs.97574 exosome component Rrp41<br>/FL=gb:BC002777.1 gb:AF281133.1 gb:NM_019037.1                                                                                                                                                                         |
| 201392_s_at | 3.13 | Consensus includes gb:BG031974 /FEA=EST /DB_XREF=gi:12422804 /DB_XREF=est:602300668F1<br>/CLONE=IMAGE:4402217 /UG=Hs.76473 insulin-like growth factor 2 receptor /FL=gb:J03528.1 gb:NM_000876.1                                                                                                                                                                                                                  |
| 204619_s_at | 3.13 | Consensus includes gb:BF590263 /FEA=EST /DB_XREF=gi:11682587 /DB_XREF=est:nab22b12.x1<br>/CLONE=IMAGE:3266638 /UG=Hs.81800 chondroitin sulfate proteoglycan 2 (versican) /FL=gb:NM_004385.1                                                                                                                                                                                                                      |
| 91684_g_at  | 3.11 | Cluster Incl. AI571298:tn44e03.x1 Homo sapiens cDNA, 3 end /clone=IMAGE-2170492 /clone_end=3<br>/gb=AI571298 /gi=4534672 /ug=Hs.97574 /len=537                                                                                                                                                                                                                                                                   |
| 200075_s_at | 3.08 | gb:BC006249.1 /DEF=Homo sapiens, guanylate kinase 1, clone MGC:10618, mRNA, complete cds. /FEA=mRNA<br>/PROD=guanylate kinase 1 /DB_XREF=gi:13623296 /FL=gb:BC006249.1                                                                                                                                                                                                                                           |
| 202998_s_at | 3.07 | gb:NM_002318.1 /DEF=Homo sapiens lysyl oxidase-like 2 (LOXL2), mRNA. /FEA=mRNA /GEN=LOXL2<br>/PROD=lysyl oxidase-like 2 /DB_XREF=gi:4505010 /UG=Hs.83354 lysyl oxidase-like 2 /FL=gb:BC000594.1<br>gb:U89942.1 gb:NM_002318.1 gb:AF117949.1                                                                                                                                                                      |
| 220651_s_at | 3.07 | gb:NM_018518.1 /DEF=Homo sapiens homolog of yeast MCM10; hypothetical protein PRO2249 (PRO2249),<br>mRNA. /FEA=mRNA /GEN=PRO2249 /PROD=homolog of yeast MCM10; hypothetical protein PRO2249<br>/DB_XREF=gi:8924142 /UG=Hs.198363 homolog of yeast MCM10; hypothetical protein PRO2249<br>/FL=gb:AB042719.1 gb:BC004876.1 gb:AF119869.1 gb:NM_018518.1                                                            |
| 203931_s_at | 3.07 | gb:NM_002949.1 /DEF=Homo sapiens mitochondrial ribosomal protein L12 (MRPL12), mRNA. /FEA=mRNA<br>/GEN=MRPL12 /PROD=mitochondrial ribosomal protein L12 /DB_XREF=gi:4506672 /UG=Hs.109059<br>mitochondrial ribosomal protein L12 /FL=gb:BC002344.1 gb:U25041.1 gb:AF105278.1 gb:NM_002949.1                                                                                                                      |
| 217849_s_at | 3.05 | gb:NM_006035.1 /DEF=Homo sapiens CDC42-binding protein kinase beta (DMPK-like) (CDC42BPB), mRNA.<br>/FEA=mRNA /GEN=CDC42BPB /PROD=CDC42-binding protein kinase beta (DMPK-like) /DB_XREF=gi:5174412<br>/UG=Hs.12908 CDC42-binding protein kinase beta (DMPK-like) /FL=gb:AF128625.1 gb:NM_006035.1                                                                                                               |
| 204647_at   | 3.05 | gb:NM_004838.1 /DEF=Homo sapiens Homer, neuronal immediate early gene, 3 (HOMER-3), mRNA.<br>/FEA=mRNA /GEN=HOMER-3 /PROD=Homer, neuronal immediate early gene, 3 /DB_XREF=gi:4758549<br>/UG=Hs.166146 Homer, neuronal immediate early gene, 3 /FL=gb:AF093265.1 gb:NM_004838.1                                                                                                                                  |
| 210495_x_at | 3.05 | gb:AF130095.1 /DEF=Homo sapiens clone FLC0562 PRO2841 mRNA, complete cds. /FEA=mRNA<br>/PROD=PRO2841 /DB_XREF=gi:11493493 /UG=Hs.287820 fibronectin 1 /FL=gb:AF130095.1                                                                                                                                                                                                                                          |
| 213520_at   | 3.04 | Consensus includes gb:NM_004260.1 /DEF=Homo sapiens RecQ protein-like 4 (RECQL4), mRNA. /FEA=CDS<br>/GEN=RECQL4 /PROD=RecQ protein-like 4 /DB_XREF=gi:4759029 /UG=Hs.31442 RecQ protein-like 4<br>/FL=gb:AB006532.1 gb:NM_004260.1                                                                                                                                                                               |
| 211571_s_at | 3.04 | gb:D32039.1 /DEF=Human pgH3 mRNA for proteoglycan PG-M(V3), complete cds. /FEA=mRNA /GEN=pgH3<br>/PROD=proteoglycan PG-M(V3) /DB_XREF=gi:1008912 /UG=Hs.81800 chondroitin sulfate proteoglycan 2<br>(versican) /FL=gb:D32039.1                                                                                                                                                                                   |
| 218532_s_at | 3.04 | gb:NM_019000.1 /DEF=Homo sapiens hypothetical protein (FLJ20152), mRNA. /FEA=mRNA /GEN=FLJ20152<br>/PROD=hypothetical protein /DB_XREF=gi:9506660 /UG=Hs.82273 hypothetical protein /FL=gb:NM_019000.1                                                                                                                                                                                                           |
| 45633_at    | 3.03 | Cluster Incl. AI421812:tf55a07.x1 Homo sapiens cDNA, 3 end /clone=IMAGE-2103156 /clone_end=3                                                                                                                                                                                                                                                                                                                     |

|                         |      |                                                                                                                                                                                                                                                                                                                                                                                            |
|-------------------------|------|--------------------------------------------------------------------------------------------------------------------------------------------------------------------------------------------------------------------------------------------------------------------------------------------------------------------------------------------------------------------------------------------|
| 215078_at               | 3.01 | /gb=AI421812 /gi=4267743 /ug=Hs.47125 /len=556<br>Consensus includes gb:AL050388.1 /DEF=Homo sapiens mRNA; cDNA DKFZp564M2422 (from clone DKFZp564M2422); partial cds. /FEA=mRNA /GEN=DKFZp564M2422 /PROD=hypothetical protein /DB_XREF=gi:4914612 /UG=Hs.306320 Homo sapiens mRNA; cDNA DKFZp564M2422 (from clone DKFZp564M2422); partial cds                                             |
| 203109_at               | 3.01 | gb:NM_003969.1 /DEF=Homo sapiens ubiquitin-conjugating enzyme E2M (homologous to yeast UBC12) (UBE2M), mRNA. /FEA=mRNA /GEN=UBE2M /PROD=ubiquitin-conjugating enzyme E2M (homologous to yeast UBC12) /DB_XREF=gi:4507790 /UG=Hs.200478 ubiquitin-conjugating enzyme E2M (homologous to yeast UBC12) /FL=gb:AF075599.1 gb:AB012191.1 gb:NM_003969.1                                         |
| 201426_s_at             | 3    | Consensus includes gb:AI922599 /FEA=EST /DB_XREF=gi:5658563 /DB_XREF=est:wm90b11.x1 /CLONE=IMAGE:2443197 /UG=Hs.297753 vimentin /FL=gb:BC000163.2 gb:NM_003380.1                                                                                                                                                                                                                           |
| 221247_s_at             | 3    | gb:NM_030798.1 /DEF=Homo sapiens hypothetical protein DKFZp434D0421 (DKFZP434D0421), mRNA. /FEA=mRNA /GEN=DKFZP434D0421 /PROD=hypothetical protein DKFZp434D0421 /DB_XREF=gi:13540581 /FL=gb:NM_030798.1                                                                                                                                                                                   |
| 215735_s_at             | 3    | Consensus includes gb:AC005600 /DEF=Homo sapiens chromosome 16, P1 clone 109-9G (LANL), complete sequence /FEA=CDS_1 /DB_XREF=gi:3522919 /UG=Hs.90303 tuberous sclerosis 2                                                                                                                                                                                                                 |
| 202208_s_at             | 3    | gb:BC001051.1 /DEF=Homo sapiens, ADP-ribosylation factor-like 7, clone MGC:1575, mRNA, complete cds. /FEA=mRNA /PROD=ADP-ribosylation factor-like 7 /DB_XREF=gi:12654450 /UG=Hs.111554 ADP-ribosylation factor-like 7 /FL=gb:BC001051.1 gb:AB016811.1 gb:NM_005737.2                                                                                                                       |
| AFFX-HUMRGE/M10098_M_at | 3    | M10098 Human 18S rRNA gene, complete (_5, _M, _3 represent transcript regions 5 prime, Middle, and 3 prime respectively)                                                                                                                                                                                                                                                                   |
| 201079_at               | 2.98 | gb:NM_004710.1 /DEF=Homo sapiens synaptogyrin 2 (SYNGR2), mRNA. /FEA=mRNA /GEN=SYNGR2 /PROD=synaptogyrin 2 /DB_XREF=gi:4759201 /UG=Hs.5097 synaptogyrin 2 /FL=gb:BC000407.1 gb:NM_004710.1                                                                                                                                                                                                 |
| 200678_x_at             | 2.98 | gb:NM_002087.1 /DEF=Homo sapiens granulin (GRN), mRNA. /FEA=mRNA /GEN=GRN /PROD=granulin /DB_XREF=gi:4504150 /UG=Hs.180577 granulin /FL=gb:M75161.1 gb:AF055008.1 gb:NM_002087.1                                                                                                                                                                                                           |
| 211136_s_at             | 2.98 | gb:BC004865.1 /DEF=Homo sapiens, cleft lip and palate associated transmembrane protein 1, clone MGC:10593, mRNA, complete cds. /FEA=mRNA /PROD=cleft lip and palate associated transmembraneprotein 1 /DB_XREF=gi:13436079 /UG=Hs.106671 cleft lip and palate associated transmembrane protein 1 /FL=gb:BC004865.1                                                                         |
| 221657_s_at             | 2.97 | gb:BC001719.1 /DEF=Homo sapiens, Similar to hypothetical protein FLJ20548, clone MGC:1024, mRNA, complete cds. /FEA=mRNA /PROD=Similar to hypothetical protein FLJ20548 /DB_XREF=gi:12804594 /UG=Hs.125037 hypothetical protein FLJ20548 /FL=gb:BC001719.1                                                                                                                                 |
| 213906_at               | 2.97 | Consensus includes gb:AW592266 /FEA=EST /DB_XREF=gi:7279443 /DB_XREF=est:hf48e04.x1 /CLONE=IMAGE:2935134 /UG=Hs.300592 v-myb avian myeloblastosis viral oncogene homolog-like 1                                                                                                                                                                                                            |
| 217871_s_at             | 2.96 | gb:NM_002415.1 /DEF=Homo sapiens macrophage migration inhibitory factor (glycosylation-inhibiting factor) (MIF), mRNA. /FEA=mRNA /GEN=MIF /PROD=macrophage migration inhibitory factor(glycosylation-inhibiting factor) /DB_XREF=gi:4505184 /UG=Hs.73798 macrophage migration inhibitory factor (glycosylation-inhibiting factor) /FL=gb:BC000447.1 gb:M25639.1 gb:L10612.1 gb:NM_002415.1 |
| 204236_at               | 2.96 | gb:NM_002017.2 /DEF=Homo sapiens Friend leukemia virus integration 1 (FLI1), mRNA. /FEA=mRNA /GEN=FLI1 /PROD=Friend leukemia virus integration 1 /DB_XREF=gi:7110592 /UG=Hs.108043 Friend leukemia virus integration 1 /FL=gb:BC001670.1 gb:M98833.3 gb:NM_002017.2                                                                                                                        |

|             |      |                                                                                                                                                                                                                                                                                                                                                                                                                                |
|-------------|------|--------------------------------------------------------------------------------------------------------------------------------------------------------------------------------------------------------------------------------------------------------------------------------------------------------------------------------------------------------------------------------------------------------------------------------|
| 214426_x_at | 2.94 | Consensus includes gb:BF062223 /FEA=EST /DB_XREF=gi:10821121 /DB_XREF=est:7k74c04.x1 /CLONE=IMAGE:3480967 /UG=Hs.79018 chromatin assembly factor 1, subunit A (p150)                                                                                                                                                                                                                                                           |
| 211714_x_at | 2.94 | gb:BC005838.1 /DEF=Homo sapiens, tubulin, beta 5, clone MGC:2440, mRNA, complete cds. /FEA=mRNA /PROD=tubulin, beta 5 /DB_XREF=gi:13543349 /FL=gb:BC005838.1                                                                                                                                                                                                                                                                   |
| 219588_s_at | 2.92 | gb:NM_017760.1 /DEF=Homo sapiens hypothetical protein FLJ20311 (FLJ20311), mRNA. /FEA=mRNA /GEN=FLJ20311 /PROD=hypothetical protein FLJ20311 /DB_XREF=gi:8923292 /UG=Hs.18616 hypothetical protein FLJ20311 /FL=gb:NM_017760.1                                                                                                                                                                                                 |
| 211716_x_at | 2.92 | gb:BC005851.1 /DEF=Homo sapiens, Rho GDP dissociation inhibitor (GDI) alpha, clone MGC:2810, mRNA, complete cds. /FEA=mRNA /PROD=Rho GDP dissociation inhibitor (GDI) alpha /DB_XREF=gi:13543380 /FL=gb:BC005851.1                                                                                                                                                                                                             |
| 204462_s_at | 2.92 | gb:NM_006517.1 /DEF=Homo sapiens solute carrier family 16 (monocarboxylic acid transporters), member 2 (putative transporter) (SLC16A2), mRNA. /FEA=mRNA /GEN=SLC16A2 /PROD=solute carrier family 16 (monocarboxylic acid transporters), member 2 (putative transporter) /DB_XREF=gi:5730044 /UG=Hs.75317 solute carrier family 16 (monocarboxylic acid transporters), member 2 (putative transporter) /FL=gb:NM_006517.1      |
| 209706_at   | 2.92 | gb:AF247704.1 /DEF=Homo sapiens homeobox protein NKX3.1 mRNA, complete cds. /FEA=mRNA /PROD=homeobox protein NKX3.1 /DB_XREF=gi:9963969 /UG=Hs.55999 NK homeobox (Drosophila), family 3, A /FL=gb:AF249670.1 gb:AF249672.1 gb:U80669.1 gb:U91540.1 gb:NM_006167.1 gb:AF247704.1                                                                                                                                                |
| 202014_at   | 2.91 | gb:NM_014330.2 /DEF=Homo sapiens growth arrest and DNA-damage-inducible 34 (GADD34), mRNA. /FEA=mRNA /GEN=GADD34 /PROD=growth arrest and DNA-damage-inducible 34 /DB_XREF=gi:9790902 /UG=Hs.76556 growth arrest and DNA-damage-inducible 34 /FL=gb:BC003067.1 gb:U83981.1 gb:NM_014330.2                                                                                                                                       |
| 207891_s_at | 2.91 | gb:NM_017518.2 /DEF=Homo sapiens Xq28, 2000bp sequence contg. ORF (HSXQ28ORF), mRNA. /FEA=mRNA /GEN=HSXQ28ORF /PROD=Xq28, 2000bp sequence contg. ORF /DB_XREF=gi:11120679 /UG=Hs.6487 Xq28, 2000bp sequence contg. ORF /FL=gb:NM_017518.2 gb:AF267739.1                                                                                                                                                                        |
| 221916_at   | 2.9  | Consensus includes gb:BF055311 /FEA=EST /DB_XREF=gi:10809207 /DB_XREF=est:7j78a07.x1 /CLONE=IMAGE:3392532 /UG=Hs.302689 hypothetical protein                                                                                                                                                                                                                                                                                   |
| 218875_s_at | 2.9  | gb:NM_012177.1 /DEF=Homo sapiens F-box only protein 5 (FBXO5), mRNA. /FEA=mRNA /GEN=FBXO5 /PROD=F-box only protein 5 /DB_XREF=gi:6912365 /UG=Hs.272027 F-box only protein 5 /FL=gb:AF129535.1 gb:NM_012177.1                                                                                                                                                                                                                   |
| 205035_at   | 2.9  | gb:NM_004715.1 /DEF=Homo sapiens CTD (carboxy-terminal domain, RNA polymerase II, polypeptide A) phosphatase, subunit 1 (CTDP1), mRNA. /FEA=mRNA /GEN=CTDP1 /PROD=CTD (carboxy-terminal domain, RNA polymerase II, polypeptide A) phosphatase, subunit 1 /DB_XREF=gi:4758093 /UG=Hs.4076 CTD (carboxy-terminal domain, RNA polymerase II, polypeptide A) phosphatase, subunit 1 /FL=gb:AF081287.1 gb:NM_004715.1 gb:AF154115.1 |
| 201331_s_at | 2.9  | gb:BC004973.1 /DEF=Homo sapiens, signal transducer and activator of transcription 6, interleukin-4 induced, clone MGC:3649, mRNA, complete cds. /FEA=mRNA /PROD=signal transducer and activator of transcription 6, interleukin-4 induced /DB_XREF=gi:13436385 /UG=Hs.181015 signal transducer and activator of transcription 6, interleukin-4 induced /FL=gb:BC004973.1 gb:NM_003153.1 gb:U16031.1                            |
| 205436_s_at | 2.89 | gb:NM_002105.1 /DEF=Homo sapiens H2A histone family, member X (H2AFX), mRNA. /FEA=mRNA /GEN=H2AFX /PROD=H2A histone family, member X /DB_XREF=gi:4504252 /UG=Hs.147097 H2A histone family, member X /FL=gb:BC004915.1 gb:NM_002105.1                                                                                                                                                                                           |
| 213187_x_at | 2.87 | Consensus includes gb:BG538564 /FEA=EST /DB_XREF=gi:13530797 /DB_XREF=est:602567289F1 /CLONE=IMAGE:4691639 /UG=Hs.324746 alpha-2-HS-glycoprotein                                                                                                                                                                                                                                                                               |
| 204603_at   | 2.86 | gb:NM_003686.1 /DEF=Homo sapiens exonuclease 1 (EXO1), mRNA. /FEA=mRNA /GEN=EXO1 /PROD=Rad2                                                                                                                                                                                                                                                                                                                                    |

|             |      |                                                                                                                                                                                                                                                                                                                                                                                                                           |
|-------------|------|---------------------------------------------------------------------------------------------------------------------------------------------------------------------------------------------------------------------------------------------------------------------------------------------------------------------------------------------------------------------------------------------------------------------------|
|             |      | nuclease family member, homolog of <i>S.cerevisiae</i> exonuclease 1 /DB_XREF=gi:4504368 /UG=Hs.47504 exonuclease 1 /FL=gb:NM_006027.1 gb:AF042282.1 gb:AF060479.1 gb:AF091740.1 gb:AF084974.1 gb:NM_003686.1                                                                                                                                                                                                             |
| 204768_s_at | 2.84 | gb:NM_004111.3 /DEF=Homo sapiens flap structure-specific endonuclease 1 (FEN1), mRNA. /FEA=mRNA /GEN=FEN1 /PROD=flap structure-specific endonuclease 1 /DB_XREF=gi:6325465 /UG=Hs.4756 flap structure-specific endonuclease 1 /FL=gb:BC000323.1 gb:NM_004111.3                                                                                                                                                            |
| 220615_s_at | 2.84 | gb:NM_018099.1 /DEF=Homo sapiens hypothetical protein FLJ10462 (FLJ10462), mRNA. /FEA=mRNA /GEN=FLJ10462 /PROD=hypothetical protein FLJ10462 /DB_XREF=gi:8922433 /UG=Hs.100895 hypothetical protein FLJ10462 /FL=gb:AL136843.1 gb:NM_018099.1                                                                                                                                                                             |
| 211168_s_at | 2.82 | gb:D86988.1 /DEF=Human mRNA for KIAA0221 gene, complete cds. /FEA=mRNA /GEN=KIAA0221 /PROD=KIAA0221 /DB_XREF=gi:1944406 /UG=Hs.12719 regulator of nonsense transcripts 1 /FL=gb:D86988.1                                                                                                                                                                                                                                  |
| 31874_at    | 2.81 | Cluster Incl. Y07846:H.sapiens mRNA for GAR22 protein /cds=(132,1145) /gb=Y07846 /gi=1666070 /ug=Hs.15346 /len=2238                                                                                                                                                                                                                                                                                                       |
| 211006_s_at | 2.81 | gb:L02840.1 /DEF=Homo sapiens potassium channel Kv2.1 mRNA, complete cds. /FEA=mRNA /PROD=voltage-gated potassium channel /DB_XREF=gi:186797 /UG=Hs.84244 potassium voltage-gated channel, Shab-related subfamily, member 1 /FL=gb:L02840.1 gb:AF026005.1 gb:NM_004975.1                                                                                                                                                  |
| 203718_at   | 2.8  | gb:NM_006702.1 /DEF=Homo sapiens neuropathy target esterase (NTE), mRNA. /FEA=mRNA /GEN=NTE /PROD=neuropathy target esterase /DB_XREF=gi:5729950 /UG=Hs.5038 neuropathy target esterase /FL=gb:NM_006702.1                                                                                                                                                                                                                |
| 200852_x_at | 2.8  | gb:NM_005273.1 /DEF=Homo sapiens guanine nucleotide binding protein (G protein), beta polypeptide 2 (GNB2), mRNA. /FEA=mRNA /GEN=GNB2 /PROD=guanine nucleotide binding protein (G protein),beta polypeptide 2 /DB_XREF=gi:4885282 /UG=Hs.91299 guanine nucleotide binding protein (G protein), beta polypeptide 2 /FL=gb:M16538.1 gb:M36429.1 gb:NM_005273.1                                                              |
| 209665_at   | 2.8  | gb:AF040704.1 /DEF=Homo sapiens putative tumor suppressor protein (101F6) mRNA, complete cds. /FEA=mRNA /GEN=101F6 /PROD=putative tumor suppressor protein /DB_XREF=gi:2935319 /UG=Hs.149443 putative tumor suppressor /FL=gb:AF040704.1 gb:NM_007022.1                                                                                                                                                                   |
| 202270_at   | 2.8  | gb:NM_002053.1 /DEF=Homo sapiens guanylate binding protein 1, interferon-inducible, 67kD (GBP1), mRNA. /FEA=mRNA /GEN=GBP1 /PROD=guanylate binding protein 1,interferon-inducible, 67kD /DB_XREF=gi:4503938 /UG=Hs.62661 guanylate binding protein 1, interferon-inducible, 67kD /FL=gb:BC002666.1 gb:M55542.1 gb:NM_002053.1                                                                                             |
| 202071_at   | 2.79 | gb:NM_002999.1 /DEF=Homo sapiens syndecan 4 (amphiglycan, ryudocan) (SDC4), mRNA. /FEA=mRNA /GEN=SDC4 /PROD=syndecan 4 (amphiglycan, ryudocan) /DB_XREF=gi:4506860 /UG=Hs.252189 syndecan 4 (amphiglycan, ryudocan) /FL=gb:NM_002999.1                                                                                                                                                                                    |
| 212636_at   | 2.79 | Consensus includes gb:AL031781 /DEF=Human DNA sequence from clone 51J12 on chromosome 6q26-27. Contains the 3 part of the alternatively spliced gene for the human orthologs of mouse QKI-7 and QKI-7B (KH Domain RNA Binding proteins) and zebrafish ZKQ-1 (Quaking protein homolog). Con... /FEA=mRNA_2 /DB_XREF=gi:4038570 /UG=Hs.15020 homolog of mouse quaking QKI (KH domain RNA binding protein) /FL=gb:AF142417.1 |
| 213977_s_at | 2.79 | Consensus includes gb:AA054734 /FEA=EST /DB_XREF=gi:1545679 /DB_XREF=est:zk68f07.s1 /CLONE=IMAGE:488005 /UG=Hs.23476 Cip1-interacting zinc finger protein                                                                                                                                                                                                                                                                 |
| 201700_at   | 2.78 | gb:NM_001760.1 /DEF=Homo sapiens cyclin D3 (CCND3), mRNA. /FEA=mRNA /GEN=CCND3 /PROD=cyclin D3 /DB_XREF=gi:4502618 /UG=Hs.83173 cyclin D3 /FL=gb:M90814.1 gb:M92287.1 gb:NM_001760.1                                                                                                                                                                                                                                      |
| 200766_at   | 2.78 | gb:NM_001909.1 /DEF=Homo sapiens cathepsin D (lysosomal aspartyl protease) (CTSD), mRNA. /FEA=mRNA                                                                                                                                                                                                                                                                                                                        |



|             |      |                                                                                                                                                                                                                                                                                                                                                                                            |
|-------------|------|--------------------------------------------------------------------------------------------------------------------------------------------------------------------------------------------------------------------------------------------------------------------------------------------------------------------------------------------------------------------------------------------|
|             |      | /GEN=CTSD /PROD=cathepsin D (lysosomal aspartyl protease) /DB_XREF=gi:4503142 /UG=Hs.79572 cathepsin D (lysosomal aspartyl protease) /FL=gb:M11233.1 gb:NM_001909.1                                                                                                                                                                                                                        |
| 212646_at   | 2.78 | Consensus includes gb:D42043.1 /DEF=Human mRNA for KIAA0084 gene, partial cds. /FEA=mRNA /GEN=KIAA0084 /DB_XREF=gi:577298 /UG=Hs.79123 KIAA0084 protein                                                                                                                                                                                                                                    |
| 213040_s_at | 2.78 | Consensus includes gb:AL008583 /DEF=Human DNA sequence from clone RP3-327J16 on chromosome 22q12.3-13.2 Contains the DNAL4 gene for axonemal dynein light polypeptide 4, the NPTXR gene for neuronal pentraxin receptor and the CBX6 gene for chromobox homolog 6. Contains ESTs, STSs, a G... /FEA=mRNA_2 /DB_XREF=gi:4160195 /UG=Hs.91622 neuronal pentraxin receptor /FL=gb:NM_014293.1 |
| 52741_at    | 2.77 | Cluster Incl. AI962879:wt24c06.x1 Homo sapiens cDNA, 3' end /clone=IMAGE-2508394 /clone_end=3 /gb=AI962879 /gi=5755592 /ug=Hs.81920 /len=490                                                                                                                                                                                                                                               |
| 208791_at   | 2.77 | gb:M25915.1 /DEF=Human complement cytolysis inhibitor (CLI) mRNA, complete cds. /FEA=mRNA /DB_XREF=gi:180619 /UG=Hs.75106 clusterin (complement lysis inhibitor, SP-40,40, sulfated glycoprotein 2, testosterone-repressed prostate message 2, apolipoprotein J) /FL=gb:J02908.1 gb:M25915.1 gb:M64722.1 gb:NM_001831.1                                                                    |
| 214383_x_at | 2.77 | Consensus includes gb:BF063121 /FEA=EST /DB_XREF=gi:10822031 /DB_XREF=est:7h83f11.x1 /CLONE=IMAGE:3322605 /UG=Hs.281706 sortilin 1                                                                                                                                                                                                                                                         |
| 206953_s_at | 2.76 | gb:NM_012302.1 /DEF=Homo sapiens latrophilin (KIAA0786), mRNA. /FEA=mRNA /GEN=KIAA0786 /PROD=latrophilin /DB_XREF=gi:6912463 /UG=Hs.24212 latrophilin /FL=gb:AF104939.1 gb:NM_012302.1                                                                                                                                                                                                     |
| 208711_s_at | 2.76 | gb:BC000076.1 /DEF=Homo sapiens, cyclin D1 (PRAD1: parathyroid adenomatosis 1), clone MGC:2316, mRNA, complete cds. /FEA=mRNA /PROD=cyclin D1 (PRAD1: parathyroid adenomatosis 1) /DB_XREF=gi:12652656 /UG=Hs.82932 cyclin D1 (PRAD1: parathyroid adenomatosis 1) /FL=gb:BC000076.1 gb:M73554.1                                                                                            |
| 204727_at   | 2.76 | Consensus includes gb:AW772140 /FEA=EST /DB_XREF=gi:7704203 /DB_XREF=est:hn68b03.x1 /CLONE=IMAGE:3033005 /UG=Hs.72160 AND-1 protein /FL=gb:NM_007086.1                                                                                                                                                                                                                                     |
| 209729_at   | 2.75 | gb:BC001782.1 /DEF=Homo sapiens, GAS2-related on chromosome 22, clone MGC:2104, mRNA, complete cds. /FEA=mRNA /PROD=GAS2-related on chromosome 22 /DB_XREF=gi:12804706 /UG=Hs.322852 Homo sapiens, GAS2-related on chromosome 22, clone MGC:2104, mRNA, complete cds /FL=gb:BC001782.1                                                                                                     |
| 213726_x_at | 2.75 | Consensus includes gb:AA515698 /FEA=EST /DB_XREF=gi:2255298 /DB_XREF=est:nf66f09.s1 /CLONE=IMAGE:924905 /UG=Hs.251653 tubulin, beta, 2                                                                                                                                                                                                                                                     |
| 212907_at   | 2.75 | Consensus includes gb:AI972416 /FEA=EST /DB_XREF=gi:5769332 /DB_XREF=est:wr39d10.x1 /CLONE=IMAGE:2490067 /UG=Hs.24385 Human hbc647 mRNA sequence                                                                                                                                                                                                                                           |
| 209719_x_at | 2.75 | gb:U19556.1 /DEF=Human squamous cell carcinoma antigen 1 (SCCA1) mRNA, complete cds. /FEA=mRNA /GEN=SCCA1 /PROD=squamous cell carcinoma antigen 1 /DB_XREF=gi:1276435 /UG=Hs.227948 serine (or cysteine) proteinase inhibitor, clade B (ovalbumin), member 3 /FL=gb:U19556.1 gb:BC005224.1 gb:NM_006919.1                                                                                  |
| 209953_s_at | 2.74 | gb:U63131.1 /DEF=Human CDC37 homolog mRNA, complete cds. /FEA=mRNA /PROD=CDC37 homolog /DB_XREF=gi:1421820 /UG=Hs.160958 CDC37 (cell division cycle 37, S. cerevisiae, homolog) /FL=gb:BC000083.1 gb:U43077.1 gb:U63131.1 gb:NM_007065.1                                                                                                                                                   |
| 203270_at   | 2.74 | gb:NM_012145.1 /DEF=Homo sapiens deoxythymidylate kinase (thymidylate kinase) (DTYMK), mRNA. /FEA=mRNA /GEN=DTYMK /PROD=deoxythymidylate kinase (thymidylate kinase) /DB_XREF=gi:6912339 /UG=Hs.79006 deoxythymidylate kinase (thymidylate kinase) /FL=gb:BC001827.1 gb:L16991.1 gb:NM_012145.1                                                                                            |
| 219869_s_at | 2.74 | gb:NM_022154.1 /DEF=Homo sapiens up-regulated by BCG-CWS (LOC64116), mRNA. /FEA=mRNA /GEN=LOC64116 /PROD=up-regulated by BCG-CWS /DB_XREF=gi:11545899 /UG=Hs.284205 up-regulated by BCG-CWS /FL=gb:NM_022154.1                                                                                                                                                                             |
| 214290_s_at | 2.74 | Consensus includes gb:AI313324 /FEA=EST /DB_XREF=gi:4018929 /DB_XREF=est:ta77f02.x2                                                                                                                                                                                                                                                                                                        |

|             |      |                                                                                                                                                                                                                                                                                                                                                                                                                         |
|-------------|------|-------------------------------------------------------------------------------------------------------------------------------------------------------------------------------------------------------------------------------------------------------------------------------------------------------------------------------------------------------------------------------------------------------------------------|
| 217785_s_at | 2.74 | /CLONE=IMAGE:2050107 /UG=Hs.795 H2A histone family, member O<br>gb:NM_006555.1 /DEF=Homo sapiens SNARE protein (YKT6), mRNA. /FEA=mRNA /GEN=YKT6 /PROD=SNARE protein /DB_XREF=gi:5730119 /UG=Hs.296244 SNARE protein /FL=gb:U95735.1 gb:NM_006555.1                                                                                                                                                                     |
| 212873_at   | 2.73 | Consensus includes gb:BE349017 /FEA=EST /DB_XREF=gi:9260870 /DB_XREF=est:ht48a03.x1<br>/CLONE=IMAGE:3149932 /UG=Hs.196914 minor histocompatibility antigen HA-1                                                                                                                                                                                                                                                         |
| 202929_s_at | 2.72 | gb:NM_001355.2 /DEF=Homo sapiens D-dopachrome tautomerase (DDT), mRNA. /FEA=mRNA /GEN=DDT<br>/PROD=D-dopachrome tautomerase /DB_XREF=gi:5453630 /UG=Hs.180015 D-dopachrome tautomerase<br>/FL=gb:U84143.1 gb:U49785.1 gb:NM_001355.2                                                                                                                                                                                    |
| 55093_at    | 2.72 | Cluster Incl. AA534198:nj21a11.s1 Homo sapiens cDNA, 3 end /clone=IMAGE-993116 /clone_end=3<br>/gb=AA534198 /gi=2278214 /ug=Hs.86392 /len=603                                                                                                                                                                                                                                                                           |
| 202736_s_at | 2.71 | Consensus includes gb:AA112507 /FEA=EST /DB_XREF=gi:1665056 /DB_XREF=est:zm28c01.r1<br>/CLONE=IMAGE:526944 /UG=Hs.76719 U6 snRNA-associated Sm-like protein /FL=gb:BC000387.1<br>gb:BC003652.1 gb:AF182290.1 gb:AF117235.1 gb:NM_012321.1 gb:AF251218.1                                                                                                                                                                 |
| 208977_x_at | 2.71 | gb:BC004188.1 /DEF=Homo sapiens, tubulin, beta, 2, clone MGC:2826, mRNA, complete cds. /FEA=mRNA<br>/PROD=tubulin, beta, 2 /DB_XREF=gi:13278848 /UG=Hs.251653 tubulin, beta, 2 /FL=gb:BC002783.1<br>gb:BC002885.1 gb:BC001911.1 gb:BC004188.1 gb:NM_006088.1                                                                                                                                                            |
| 210413_x_at | 2.71 | gb:U19557.1 /DEF=Human squamous cell carcinoma antigen 2 (SCCA2) mRNA, complete cds. /FEA=mRNA<br>/GEN=SCCA2 /PROD=squamous cell carcinoma antigen 2 /DB_XREF=gi:1052870 /UG=Hs.123035 serine (or<br>cysteine) proteinase inhibitor, clade B (ovalbumin), member 4 /FL=gb:U19557.1                                                                                                                                      |
| 211003_x_at | 2.71 | gb:BC003551.1 /DEF=Homo sapiens, Similar to transglutaminase 2 (C polypeptide, protein-glutamine-gamma-<br>glutamyltransferase), clone MGC:1193, mRNA, complete cds. /FEA=mRNA /PROD=Similar to transglutaminase 2<br>(C polypeptide,protein-glutamine-gamma-glutamyltransferase) /DB_XREF=gi:13097680 /UG=Hs.8265<br>transglutaminase 2 (C polypeptide, protein-glutamine-gamma-glutamyltransferase) /FL=gb:BC003551.1 |
| 203729_at   | 2.7  | gb:NM_001425.1 /DEF=Homo sapiens epithelial membrane protein 3 (EMP3), mRNA. /FEA=mRNA /GEN=EMP3<br>/PROD=epithelial membrane protein 3 /DB_XREF=gi:4503562 /UG=Hs.9999 epithelial membrane protein 3<br>/FL=gb:U52101.1 gb:U87947.1 gb:NM_001425.1                                                                                                                                                                     |
| 207390_s_at | 2.7  | gb:NM_006932.1 /DEF=Homo sapiens smoothelin (SMTN), mRNA. /FEA=mRNA /GEN=SMTN /PROD=smoothelin<br>/DB_XREF=gi:5902099 /UG=Hs.149098 smoothelin /FL=gb:NM_006932.1                                                                                                                                                                                                                                                       |
| 208961_s_at | 2.7  | gb:AB017493.1 /DEF=Homo sapiens mRNA for DNA-binding zinc finger(GBF), complete cds. /FEA=mRNA<br>/PROD=DNA-binding zinc finger(GBF) /DB_XREF=gi:3582142 /UG=Hs.285313 core promoter element binding<br>protein /FL=gb:BC000311.1 gb:BC004301.1 gb:AF001461.1 gb:AB017493.1 gb:NM_001300.2                                                                                                                              |
| 204928_s_at | 2.67 | gb:NM_019848.2 /DEF=Homo sapiens Protein P3 (P3), mRNA. /FEA=mRNA /GEN=P3 /PROD=Protein P3<br>/DB_XREF=gi:10938005 /UG=Hs.72980 Protein P3 /FL=gb:NM_019848.2                                                                                                                                                                                                                                                           |
| 212233_at   | 2.67 | Consensus includes gb:AL523076 /FEA=EST /DB_XREF=gi:12786569 /DB_XREF=est:AL523076<br>/CLONE=CS0DC001YI12 (3 prime) /UG=Hs.82503 H.sapiens mRNA for 3UTR of unknown protein                                                                                                                                                                                                                                             |
| 205483_s_at | 2.67 | gb:NM_005101.1 /DEF=Homo sapiens interferon-stimulated protein, 15 kDa (ISG15), mRNA. /FEA=mRNA<br>/GEN=ISG15 /PROD=interferon-stimulated protein, 15 kDa /DB_XREF=gi:4826773 /UG=Hs.833 interferon-<br>stimulated protein, 15 kDa /FL=gb:M13755.1 gb:NM_005101.1                                                                                                                                                       |
| 204451_at   | 2.67 | gb:NM_003505.1 /DEF=Homo sapiens frizzled (Drosophila) homolog 1 (FZD1), mRNA. /FEA=mRNA /GEN=FZD1<br>/PROD=frizzled 1 /DB_XREF=gi:4503824 /UG=Hs.94234 frizzled (Drosophila) homolog 1 /FL=gb:AB017363.1<br>gb:NM_003505.1 gb:AF072872.1                                                                                                                                                                               |
| 209357_at   | 2.66 | gb:AF109161.1 /DEF=Homo sapiens p35srj (MRG1) mRNA, complete cds. /FEA=mRNA /GEN=MRG1<br>/PROD=p35srj /DB_XREF=gi:4193945 /UG=Hs.82071 Cbpb300-interacting transactivator, with GluAsp-rich                                                                                                                                                                                                                             |

|             |      |                                                                                                                                                                                                                                                                                                                                                                              |
|-------------|------|------------------------------------------------------------------------------------------------------------------------------------------------------------------------------------------------------------------------------------------------------------------------------------------------------------------------------------------------------------------------------|
| 208712_at   | 2.66 | carboxy-terminal domain, 2 /FL=gb:BC004377.1 gb:AF109161.1<br>gb:M73554.1 /DEF=Human bcl-1 mRNA, complete CDS. /FEA=mRNA /GEN=bcl-1 /PROD=bcl-1<br>/DB_XREF=gi:179364 /UG=Hs.82932 cyclin D1 (PRAD1: parathyroid adenomatosis 1) /FL=gb:BC000076.1<br>gb:M73554.1                                                                                                            |
| 213432_at   | 2.66 | Consensus includes gb:AI697108 /FEA=EST /DB_XREF=gi:4985008 /DB_XREF=est:tq14g03.x1<br>/CLONE=IMAGE:2208820 /UG=Hs.102482 mucin 5, subtype B, tracheobronchial                                                                                                                                                                                                               |
| 212782_x_at | 2.65 | Consensus includes gb:BG335629 /FEA=EST /DB_XREF=gi:13142067 /DB_XREF=est:602404254F1<br>/CLONE=IMAGE:4542084 /UG=Hs.80475 polymerase (RNA) II (DNA directed) polypeptide J (13.3kD)                                                                                                                                                                                         |
| 204221_x_at | 2.65 | gb:U16307.1 /DEF=Human glioma pathogenesis-related protein (GliPR) mRNA, complete cds. /FEA=mRNA<br>/GEN=GliPR /PROD=glioma pathogenesis-related protein /DB_XREF=gi:1100927 /UG=Hs.64639 glioma<br>pathogenesis-related protein /FL=gb:U16307.1 gb:NM_006851.1                                                                                                              |
| 212878_s_at | 2.65 | Consensus includes gb:AA284075 /FEA=EST /DB_XREF=gi:1928356 /DB_XREF=est:zs49b01.s1<br>/CLONE=IMAGE:700777 /UG=Hs.117977 kinesin 2 (60-70kD)                                                                                                                                                                                                                                 |
| 208677_s_at | 2.64 | Consensus includes gb:AL550657 /FEA=EST /DB_XREF=gi:12887837 /DB_XREF=est:AL550657<br>/CLONE=CS0DI058Y115 (5 prime) /UG=Hs.74631 basigin (OK blood group) /FL=gb:M87879.1 gb:L20471.1<br>gb:D45131.1 gb:L10240.1 gb:NM_001728.1                                                                                                                                              |
| 202870_s_at | 2.63 | gb:NM_001255.1 /DEF=Homo sapiens CDC20 (cell division cycle 20, S. cerevisiae, homolog) (CDC20), mRNA.<br>/FEA=mRNA /GEN=CDC20 /PROD=cell division cycle 20 /DB_XREF=gi:4557436 /UG=Hs.82906 CDC20 (cell<br>division cycle 20, S. cerevisiae, homolog) /FL=gb:BC001088.1 gb:AF099644.1 gb:NM_001255.1 gb:U05340.1                                                            |
| 209267_s_at | 2.63 | gb:AB040120.1 /DEF=Homo sapiens mRNA for BCG induced integral membrane protein BIGMo-103, complete<br>cds. /FEA=mRNA /GEN=BIGMo-103 /PROD=BCG induced integral membrane protein BIGMo-103<br>/DB_XREF=gi:12657580 /UG=Hs.284205 up-regulated by BCG-CWS /FL=gb:AB040120.1                                                                                                    |
| 200783_s_at | 2.63 | gb:NM_005563.2 /DEF=Homo sapiens leukemia-associated phosphoprotein p18 (stathmin) (LAP18), mRNA.<br>/FEA=mRNA /GEN=LAP18 /PROD=leukemia-associated phosphoprotein p18 /DB_XREF=gi:13518023<br>/UG=Hs.81915 leukemia-associated phosphoprotein p18 (stathmin) /FL=gb:NM_005563.2 gb:J04991.1                                                                                 |
| 214687_x_at | 2.62 | Consensus includes gb:AK026577.1 /DEF=Homo sapiens cDNA: FLJ22924 fis, clone KAT06977, highly similar to<br>HSALDAR Human fibroblast mRNA for aldolase A. /FEA=mRNA /DB_XREF=gi:10439461 /UG=Hs.273415<br>aldolase A, fructose-bisphosphate                                                                                                                                  |
| 201173_x_at | 2.62 | gb:NM_006600.1 /DEF=Homo sapiens nuclear distribution gene C (A.nidulans) homolog (NUDC), mRNA.<br>/FEA=mRNA /GEN=NUDC /PROD=nuclear distribution gene C (A.nidulans)homolog /DB_XREF=gi:5729952<br>/UG=Hs.263812 nuclear distribution gene C (A.nidulans) homolog /FL=gb:BC002399.1 gb:BC003132.1<br>gb:AB019408.1 gb:AF130736.1 gb:AF125465.1 gb:AF100760.1 gb:NM_006600.1 |
| 211719_x_at | 2.61 | gb:BC005858.1 /DEF=Homo sapiens, clone MGC:3255, mRNA, complete cds. /FEA=mRNA /PROD=Unknown<br>(protein for MGC:3255) /DB_XREF=gi:13543399 /FL=gb:BC005858.1                                                                                                                                                                                                                |
| 221512_at   | 2.6  | gb:AL136683.1 /DEF=Homo sapiens mRNA; cDNA DKFZp564D0478 (from clone DKFZp564D0478); complete cds.<br>/FEA=mRNA /GEN=DKFZp564D0478 /PROD=hypothetical protein /DB_XREF=gi:12052889 /UG=Hs.321214<br>Homo sapiens mRNA; cDNA DKFZp564D0478 (from clone DKFZp564D0478); complete cds /FL=gb:AL136683.1                                                                         |
| 205083_at   | 2.6  | gb:NM_001159.2 /DEF=Homo sapiens aldehyde oxidase 1 (AOX1), mRNA. /FEA=mRNA /GEN=AOX1<br>/PROD=aldehyde oxidase 1 /DB_XREF=gi:6598319 /UG=Hs.174151 aldehyde oxidase 1 /FL=gb:AB046692.1<br>gb:L11005.1 gb:NM_001159.2                                                                                                                                                       |
| 213338_at   | 2.6  | Consensus includes gb:BF062629 /FEA=EST /DB_XREF=gi:10821539 /DB_XREF=est:7h62h07.x1<br>/CLONE=IMAGE:3320605 /UG=Hs.35861 DKFZP586E1621 protein                                                                                                                                                                                                                              |
| 218115_at   | 2.59 | gb:NM_018154.1 /DEF=Homo sapiens hypothetical protein FLJ10604 (FLJ10604), mRNA. /FEA=mRNA                                                                                                                                                                                                                                                                                   |

|             |      |                                                                                                                                                                                                                                                                                                                                                                                |
|-------------|------|--------------------------------------------------------------------------------------------------------------------------------------------------------------------------------------------------------------------------------------------------------------------------------------------------------------------------------------------------------------------------------|
|             |      | /GEN=FLJ10604 /PROD=hypothetical protein FLJ10604 /DB_XREF=gi:8922548 /UG=Hs.26516 hypothetical protein FLJ10604 /FL=gb:NM_018154.1                                                                                                                                                                                                                                            |
| 216041_x_at | 2.59 | Consensus includes gb:AK023348.1 /DEF=Homo sapiens cDNA FLJ13286 fis, clone OVARC1001154, highly similar to Homo sapiens clone 24720 epithelin 1 and 2 mRNA. /FEA=mRNA /DB_XREF=gi:10435243 /UG=Hs.180577 granulin                                                                                                                                                             |
| 201818_at   | 2.59 | gb:NM_024830.1 /DEF=Homo sapiens hypothetical protein FLJ12443 (FLJ12443), mRNA. /FEA=mRNA /GEN=FLJ12443 /PROD=hypothetical protein FLJ12443 /DB_XREF=gi:13376233 /UG=Hs.179882 hypothetical protein FLJ12443 /FL=gb:NM_024830.1                                                                                                                                               |
| 214085_x_at | 2.59 | Consensus includes gb:AI912583 /FEA=EST /DB_XREF=gi:5632438 /DB_XREF=est:we11d05.x1 /CLONE=IMAGE:2340777 /UG=Hs.154762 HIV-1 rev binding protein 2                                                                                                                                                                                                                             |
| 202017_at   | 2.58 | gb:NM_000120.2 /DEF=Homo sapiens epoxide hydrolase 1, microsomal (xenobiotic) (EPHX1), mRNA. /FEA=mRNA /GEN=EPHX1 /PROD=epoxide hydrolase 1, microsomal (xenobiotic) /DB_XREF=gi:4557560 /UG=Hs.89649 epoxide hydrolase 1, microsomal (xenobiotic) /FL=gb:BC003567.1 gb:J03518.1 gb:L25878.1 gb:L25879.1 gb:NM_000120.2                                                        |
| 202219_at   | 2.58 | gb:NM_005629.1 /DEF=Homo sapiens solute carrier family 6 (neurotransmitter transporter, creatine), member 8 (SLC6A8), mRNA. /FEA=mRNA /GEN=SLC6A8 /PROD=solute carrier family 6 (neurotransmitter transporter, creatine), member 8 /DB_XREF=gi:5032096 /UG=Hs.187958 solute carrier family 6 (neurotransmitter transporter, creatine), member 8 /FL=gb:L31409.1 gb:NM_005629.1 |
| 208792_s_at | 2.58 | gb:M25915.1 /DEF=Human complement cytolysis inhibitor (CLI) mRNA, complete cds. /FEA=mRNA /DB_XREF=gi:180619 /UG=Hs.75106 clusterin (complement lysis inhibitor, SP-40,40, sulfated glycoprotein 2, testosterone-repressed prostate message 2, apolipoprotein J) /FL=gb:J02908.1 gb:M25915.1 gb:M64722.1 gb:NM_001831.1                                                        |
| 204916_at   | 2.57 | gb:NM_005855.1 /DEF=Homo sapiens receptor (calcitonin) activity modifying protein 1 (RAMP1), mRNA. /FEA=mRNA /GEN=RAMP1 /PROD=receptor (calcitonin) activity modifying protein1 precursor /DB_XREF=gi:5032018 /UG=Hs.32989 receptor (calcitonin) activity modifying protein 1 /FL=gb:BC000548.1 gb:NM_005855.1                                                                 |
| 210869_s_at | 2.57 | gb:M29277.1 /DEF=Human isolate JuSo MUC18 glycoprotein mRNA (3 variant), complete cds. /FEA=mRNA /PROD=MUC18 glycoprotein /DB_XREF=gi:530047 /UG=Hs.211579 melanoma adhesion molecule /FL=gb:M29277.1                                                                                                                                                                          |
| 204158_s_at | 2.56 | gb:NM_006019.1 /DEF=Homo sapiens T-cell, immune regulator 1 (TCIRG1), mRNA. /FEA=mRNA /GEN=TCIRG1 /PROD=ATPase, H+ transporting, 116kD /DB_XREF=gi:5174620 /UG=Hs.46465 T-cell, immune regulator 1 /FL=gb:U45285.1 gb:NM_006019.1                                                                                                                                              |
| 203879_at   | 2.56 | gb:U86453.1 /DEF=Human phosphatidylinositol 3-kinase catalytic subunit p110delta mRNA, complete cds. /FEA=mRNA /PROD=phosphatidylinositol 3-kinase catalytic subunitp110delta /DB_XREF=gi:2317893 /UG=Hs.162808 phosphoinositide-3-kinase, catalytic, delta polypeptide /FL=gb:U86453.1 gb:NM_005026.1                                                                         |
| 209772_s_at | 2.55 | gb:X69397.1 /DEF=H.sapiens CD24 gene, complete CDS. /FEA=mRNA /GEN=CD24 /PROD=cell surface antigen /DB_XREF=gi:396167 /UG=Hs.286124 CD24 antigen (small cell lung carcinoma cluster 4 antigen) /FL=gb:X69397.1                                                                                                                                                                 |
| 52078_at    | 2.55 | Cluster Incl. AI828080:wk31e09.x1 Homo sapiens cDNA, 3 end /clone=IMAGE-2413960 /clone_end=3 /gb=AI828080 /gi=5448751 /ug=Hs.4293 /len=544                                                                                                                                                                                                                                     |
| 202391_at   | 2.55 | gb:NM_006317.1 /DEF=Homo sapiens brain acid-soluble protein 1 (BASP1), mRNA. /FEA=mRNA /GEN=BASP1 /PROD=brain acid-soluble protein 1 /DB_XREF=gi:5453749 /UG=Hs.79516 brain abundant, membrane attached signal protein 1 /FL=gb:BC000518.1 gb:AF039656.1 gb:NM_006317.1                                                                                                        |

|             |      |                                                                                                                                                                                                                                                                                                                                                                  |
|-------------|------|------------------------------------------------------------------------------------------------------------------------------------------------------------------------------------------------------------------------------------------------------------------------------------------------------------------------------------------------------------------|
| 203832_at   | 2.54 | gb:NM_003095.1 /DEF=Homo sapiens small nuclear ribonucleoprotein polypeptide F (SNRPF), mRNA. /FEA=mRNA /GEN=SNRPF /PROD=small nuclear ribonucleoprotein polypeptide F /DB_XREF=gi:4507130 /UG=Hs.105465 small nuclear ribonucleoprotein polypeptide F /FL=gb:BC002505.1 gb:NM_003095.1                                                                          |
| 218494_s_at | 2.54 | gb:NM_020062.1 /DEF=Homo sapiens GLUT4 enhancer factor (GEF), mRNA. /FEA=mRNA /GEN=GEF /PROD=GLUT4 enhancer factor /DB_XREF=gi:13236503 /UG=Hs.170088 GLUT4 enhancer factor /FL=gb:AF249267.3 gb:NM_020062.1                                                                                                                                                     |
| 218741_at   | 2.54 | gb:NM_024053.1 /DEF=Homo sapiens hypothetical protein MGC861 (MGC861), mRNA. /FEA=mRNA /GEN=MGC861 /PROD=hypothetical protein MGC861 /DB_XREF=gi:13129021 /UG=Hs.208912 hypothetical protein MGC861 /FL=gb:BC000705.1 gb:NM_024053.1                                                                                                                             |
| 203968_s_at | 2.53 | gb:NM_001254.1 /DEF=Homo sapiens CDC6 (cell division cycle 6, S. cerevisiae) homolog (CDC6), mRNA. /FEA=mRNA /GEN=CDC6 /PROD=CDC6 (cell division cycle 6, S. cerevisiae)homolog /DB_XREF=gi:4502702 /UG=Hs.69563 CDC6 (cell division cycle 6, S. cerevisiae) homolog /FL=gb:U77949.1 gb:AF022109.1 gb:NM_001254.1                                                |
| 204331_s_at | 2.52 | gb:NM_021107.1 /DEF=Homo sapiens mitochondrial ribosomal protein S12 (MRPS12), mRNA. /FEA=mRNA /GEN=MRPS12 /PROD=mitochondrial ribosomal protein S12 /DB_XREF=gi:11056055 /UG=Hs.9964 mitochondrial ribosomal protein S12 /FL=gb:NM_021107.1                                                                                                                     |
| 203462_x_at | 2.51 | gb:NM_003751.1 /DEF=Homo sapiens eukaryotic translation initiation factor 3, subunit 9 (eta, 116kD) (EIF3S9), mRNA. /FEA=mRNA /GEN=EIF3S9 /PROD=eukaryotic translation initiation factor 3,subunit 9 (eta, 116kD) /DB_XREF=gi:4503526 /UG=Hs.57783 eukaryotic translation initiation factor 3, subunit 9 (eta, 116kD) /FL=gb:U62583.1 gb:NM_003751.1             |
| 219990_at   | 2.5  | gb:NM_024680.1 /DEF=Homo sapiens hypothetical protein FLJ23311 (FLJ23311), mRNA. /FEA=mRNA /GEN=FLJ23311 /PROD=hypothetical protein FLJ23311 /DB_XREF=gi:13375949 /UG=Hs.94292 hypothetical protein FLJ23311 /FL=gb:NM_024680.1                                                                                                                                  |
| 200916_at   | 2.5  | gb:NM_003564.1 /DEF=Homo sapiens transgelin 2 (TAGLN2), mRNA. /FEA=mRNA /GEN=TAGLN2 /PROD=transgelin 2 /DB_XREF=gi:4507356 /UG=Hs.75725 transgelin 2 /FL=gb:D21261.1 gb:NM_003564.1                                                                                                                                                                              |
| 32502_at    | 2.49 | Cluster Incl. AL041124:DKFZp434D0316_s1 Homo sapiens cDNA, 3 end /clone=DKFZp434D0316 /clone_end=3 /gb=AL041124 /gi=5410060 /ug=Hs.6748 /len=719                                                                                                                                                                                                                 |
| 212192_at   | 2.48 | Consensus includes gb:A1718937 /FEA=EST /DB_XREF=gi:5036193 /DB_XREF=est:as50b04.x1 /CLONE=IMAGE:2320591 /UG=Hs.109438 Homo sapiens clone 24775 mRNA sequence                                                                                                                                                                                                    |
| 202284_s_at | 2.48 | gb:NM_000389.1 /DEF=Homo sapiens cyclin-dependent kinase inhibitor 1A (p21, Cip1) (CDKN1A), mRNA. /FEA=mRNA /GEN=CDKN1A /PROD=cyclin-dependent kinase inhibitor 1A (p21,Cip1) /DB_XREF=gi:11386202 /UG=Hs.179665 cyclin-dependent kinase inhibitor 1A (p21, Cip1) /FL=gb:NM_000389.1 gb:BC000275.1 gb:BC001935.1 gb:U03106.1 gb:L26165.1 gb:L25610.1 gb:U09579.1 |
| 206277_at   | 2.45 | gb:NM_002564.1 /DEF=Homo sapiens purinergic receptor P2Y, G-protein coupled, 2 (P2RY2), mRNA. /FEA=mRNA /GEN=P2RY2 /PROD=purinergic receptor P2Y, G-protein coupled, 2 /DB_XREF=gi:4505558 /UG=Hs.339 purinergic receptor P2Y, G-protein coupled, 2 /FL=gb:NM_002564.1 gb:U07225.1                                                                               |
| 208024_s_at | 2.44 | gb:NM_005675.1 /DEF=Homo sapiens DiGeorge syndrome critical region gene 6 (DGCR6), mRNA. /FEA=mRNA /GEN=DGCR6 /PROD=DiGeorge syndrome critical region protein 6 /DB_XREF=gi:5031662 /UG=Hs.153910 DiGeorge syndrome critical region gene 6 /FL=gb:AF228707.1 gb:NM_005675.1                                                                                      |
| 208973_at   | 2.44 | gb:BC001072.1 /DEF=Homo sapiens, clone MGC:2683, mRNA, complete cds. /FEA=mRNA /PROD=Unknown (protein for MGC:2683) /DB_XREF=gi:12654484 /UG=Hs.151032 hypothetical protein MGC2683 /FL=gb:BC001072.1 gb:BC004456.1                                                                                                                                              |
| 202638_s_at | 2.44 | gb:NM_000201.1 /DEF=Homo sapiens intercellular adhesion molecule 1 (CD54), human rhinovirus receptor                                                                                                                                                                                                                                                             |

(ICAM1), mRNA. /FEA=mRNA /GEN=ICAM1 /PROD=intercellular adhesion molecule 1 precursor /DB\_XREF=gi:4557877 /UG=Hs.168383 intercellular adhesion molecule 1 (CD54), human rhinovirus receptor /FL=gb:M24283.1 gb:J03132.1 gb:NM\_000201.1

48808\_at 2.44 Cluster Incl. A1144299:qb59h06.x1 Homo sapiens cDNA, 3' end /clone=IMAGE-1704443 /clone\_end=3 /gb=A1144299 /gi=3666108 /ug=Hs.106843 /len=765

AFFX-r2-  
Hs18SrRNA-  
M\_x\_at 2.44 M10098 Human 18S rRNA sequence, length 1969 bases, middle target bases 647-1292

201950\_x\_at 2.43 gb:NM\_004930.1 /DEF=Homo sapiens capping protein (actin filament) muscle Z-line, beta (CAPZB), mRNA. /FEA=mRNA /GEN=CAPZB /PROD=F-actin capping protein beta subunit /DB\_XREF=gi:4826658 /UG=Hs.76368 capping protein (actin filament) muscle Z-line, beta /FL=gb:NM\_004930.1 gb:U03271.1

202619\_s\_at 2.43 Consensus includes gb:A1754404 /FEA=EST /DB\_XREF=gi:5132668 /DB\_XREF=est:cr24g06.x1 /CLONE=HBMSC\_cr24g06 /UG=Hs.41270 procollagen-lysine, 2-oxoglutarate 5-dioxygenase (lysine hydroxylase) 2 /FL=gb:U84573.1 gb:NM\_000935.1

201466\_s\_at 2.42 gb:NM\_002228.2 /DEF=Homo sapiens v-jun avian sarcoma virus 17 oncogene homolog (JUN), mRNA. /FEA=mRNA /GEN=JUN /PROD=v-jun avian sarcoma virus 17 oncogene homolog /DB\_XREF=gi:7710122 /UG=Hs.78465 v-jun avian sarcoma virus 17 oncogene homolog /FL=gb:BC002646.1 gb:NM\_002228.2

213476\_x\_at 2.42 Consensus includes gb:AL565749 /FEA=EST /DB\_XREF=gi:12917434 /DB\_XREF=est:AL565749 /CLONE=CS0DF007YJ03 (3 prime) /UG=Hs.159154 tubulin, beta, 4

204728\_s\_at 2.42 gb:NM\_007086.1 /DEF=Homo sapiens AND-1 protein (AND-1), mRNA. /FEA=mRNA /GEN=AND-1 /PROD=AND-1 protein /DB\_XREF=gi:5901891 /UG=Hs.72160 AND-1 protein /FL=gb:NM\_007086.1

209482\_at 2.4 gb:BC001430.1 /DEF=Homo sapiens, POP7 (processing of precursor, S. cerevisiae) homolog, clone MGC:1986, mRNA, complete cds. /FEA=mRNA /PROD=POP7 (processing of precursor, S. cerevisiae) homolog /DB\_XREF=gi:12655150 /UG=Hs.18747 POP7 (processing of precursor, S. cerevisiae) homolog /FL=gb:BC001430.1 gb:U94316.1 gb:NM\_005837.1

200736\_s\_at 2.4 gb:NM\_000581.1 /DEF=Homo sapiens glutathione peroxidase 1 (GPX1), mRNA. /FEA=mRNA /GEN=GPX1 /PROD=glutathione peroxidase 1 /DB\_XREF=gi:10834975 /UG=Hs.76686 glutathione peroxidase 1 /FL=gb:NM\_000581.1 gb:BC000742.1 gb:M21304.1

200966\_x\_at 2.4 gb:NM\_000034.1 /DEF=Homo sapiens aldolase A, fructose-bisphosphate (ALDOA), mRNA. /FEA=mRNA /GEN=ALDOA /PROD=aldolase A /DB\_XREF=gi:4557304 /UG=Hs.273415 aldolase A, fructose-bisphosphate /FL=gb:BC004333.1 gb:M11560.1 gb:NM\_000034.1

AFFX-  
M27830\_M\_at 2.4 M27830 Human 28S ribosomal RNA gene, complete cds (\_5, \_M, \_3 represent transcript regions 5 prime, Middle, and 3 prime respectively)

212567\_s\_at 2.4 Consensus includes gb:AL523310 /FEA=EST /DB\_XREF=gi:12786803 /DB\_XREF=est:AL523310 /CLONE=CS0DC001YN06 (3 prime) /UG=Hs.150580 putative translation initiation factor

212212\_s\_at 2.39 Consensus includes gb:BF055496 /FEA=EST /DB\_XREF=gi:10809392 /DB\_XREF=est:7j80h12.x1 /CLONE=IMAGE:3392807 /UG=Hs.112184 DKFZP586J0619 protein

217294\_s\_at 2.39 Consensus includes gb:U88968.1 /DEF=Human alpha enolase like 1 (ENO1L1) mRNA, partial cds. /FEA=mRNA /GEN=ENO1L1 /PROD=alpha enolase like 1 /DB\_XREF=gi:3282242 /UG=Hs.254105 enolase 1, (alpha)

218034\_at 2.39 gb:NM\_016068.1 /DEF=Homo sapiens CGI-135 protein (LOC51024), mRNA. /FEA=mRNA /GEN=LOC51024 /PROD=CGI-135 protein /DB\_XREF=gi:7705631 /UG=Hs.84344 CGI-135 protein /FL=gb:BC003540.1 gb:AF151893.1 gb:NM\_016068.1

211924\_s\_at 2.39 gb:AY029180.1 /DEF=Homo sapiens soluble urokinase plasminogen activator receptor precursor (SUPAR) mRNA,

|                  |      |                                                                                                                                                                                                                                                                                                                             |
|------------------|------|-----------------------------------------------------------------------------------------------------------------------------------------------------------------------------------------------------------------------------------------------------------------------------------------------------------------------------|
|                  |      | complete cds. /FEA=CDS /GEN=SUPAR /PROD=soluble urokinase plasminogen activator receptorprecursor /DB_XREF=gi:13641308 /FL=gb:AY029180.1                                                                                                                                                                                    |
| 201555_at        | 2.38 | gb:NM_002388.2 /DEF=Homo sapiens minichromosome maintenance deficient (S. cerevisiae) 3 (MCM3), mRNA. /FEA=mRNA /GEN=MCM3 /PROD=minichromosome maintenance deficient (S.cerevisiae) 3 /DB_XREF=gi:6631094 /UG=Hs.179565 minichromosome maintenance deficient (S. cerevisiae) 3 /FL=gb:BC001626.1 gb:NM_002388.2 gb:D38073.1 |
| 205516_x_at      | 2.38 | gb:NM_012127.1 /DEF=Homo sapiens Cip1-interacting zinc finger protein (CIZ1), mRNA. /FEA=mRNA /GEN=CIZ1 /PROD=Cip1-interacting zinc finger protein /DB_XREF=gi:6912307 /UG=Hs.23476 Cip1-interacting zinc finger protein /FL=gb:AB030835.1 gb:AF159025.1 gb:NM_012127.1                                                     |
| 203411_s_at      | 2.38 | gb:NM_005572.1 /DEF=Homo sapiens lamin AC (LMNA), mRNA. /FEA=mRNA /GEN=LMNA /PROD=lamin AC /DB_XREF=gi:5031874 /UG=Hs.77886 lamin AC /FL=gb:BC000511.1 gb:BC003162.1 gb:M13451.1 gb:NM_005572.1                                                                                                                             |
| 202580_x_at      | 2.37 | gb:NM_021953.1 /DEF=Homo sapiens forkhead box M1 (FOXM1), mRNA. /FEA=mRNA /GEN=FOXM1 /PROD=forkhead box M1 /DB_XREF=gi:11386144 /UG=Hs.239 forkhead box M1 /FL=gb:NM_021953.1 gb:U83113.1 gb:L16783.1                                                                                                                       |
| 218493_at        | 2.37 | gb:NM_024571.1 /DEF=Homo sapiens hypothetical protein FLJ22940 (FLJ22940), mRNA. /FEA=mRNA /GEN=FLJ22940 /PROD=hypothetical protein FLJ22940 /DB_XREF=gi:13443017 /UG=Hs.15277 hypothetical protein FLJ22940 /FL=gb:BC001381.1 gb:NM_024571.1                                                                               |
| AFFX-M27830_5_at | 2.37 | M27830 Human 28S ribosomal RNA gene, complete cds (_5, _M, _3 represent transcript regions 5 prime, Middle, and 3 prime respectively)                                                                                                                                                                                       |
| 210845_s_at      | 2.37 | gb:U08839.1 /DEF=Human urokinase-type plasminogen activator receptor mRNA, complete cds. /FEA=mRNA /PROD=urokinase-type plasminogen activator receptor /DB_XREF=gi:517197 /UG=Hs.179657 plasminogen activator, urokinase receptor /FL=gb:U08839.1                                                                           |
| 205462_s_at      | 2.37 | gb:NM_002149.1 /DEF=Homo sapiens hippocalcin-like 1 (HPCAL1), mRNA. /FEA=mRNA /GEN=HPCAL1 /PROD=hippocalcin-like 1 /DB_XREF=gi:4504474 /UG=Hs.3618 hippocalcin-like 1 /FL=gb:NM_002149.1 gb:D16227.1                                                                                                                        |
| 213629_x_at      | 2.37 | Consensus includes gb:BF246115 /FEA=EST /DB_XREF=gi:11160133 /DB_XREF=est:601854068F1 /CLONE=IMAGE:4073921 /UG=Hs.8765 RNA helicase-related protein                                                                                                                                                                         |
| 201082_s_at      | 2.36 | gb:NM_004082.2 /DEF=Homo sapiens dynactin 1 (p150, Glued (Drosophila) homolog) (DCTN1), transcript variant 1, mRNA. /FEA=mRNA /GEN=DCTN1 /PROD=dynactin 1, isoform 1 /DB_XREF=gi:13259509 /UG=Hs.74617 dynactin 1 (p150, Glued (Drosophila) homolog) /FL=gb:NM_023019.1 gb:NM_004082.2                                      |
| 218060_s_at      | 2.36 | gb:NM_024598.1 /DEF=Homo sapiens hypothetical protein FLJ13154 (FLJ13154), mRNA. /FEA=mRNA /GEN=FLJ13154 /PROD=hypothetical protein FLJ13154 /DB_XREF=gi:13375796 /UG=Hs.25303 hypothetical protein FLJ13154 /FL=gb:BC004415.1 gb:NM_024598.1                                                                               |
| 50314_i_at       | 2.36 | Cluster Incl. A1761506:wi61b11.x1 Homo sapiens cDNA, 3 end /clone=IMAGE-2394717 /clone_end=3 /gb=A1761506 /gi=5177173 /ug=Hs.239692 /len=544                                                                                                                                                                                |
| 202718_at        | 2.36 | gb:NM_000597.1 /DEF=Homo sapiens insulin-like growth factor binding protein 2 (36kD) (IGFBP2), mRNA. /FEA=mRNA /GEN=IGFBP2 /PROD=insulin-like growth factor binding protein 2(36kD) /DB_XREF=gi:10835156 /UG=Hs.162 insulin-like growth factor binding protein 2 (36kD) /FL=gb:NM_000597.1 gb:BC004312.1 gb:M35410.1        |
| 201954_at        | 2.36 | gb:NM_005720.1 /DEF=Homo sapiens actin related protein 23 complex, subunit 1A (41 kD) (ARPC1B), mRNA. /FEA=mRNA /GEN=ARPC1B /PROD=actin related protein 23 complex, subunit 1A(41 kD) /DB_XREF=gi:5031600 /UG=Hs.11538 actin related protein 23 complex, subunit 1A (41 kD) /FL=gb:BC002562.1 gb:AF006084.1 gb:NM_005720.1  |

|             |      |                                                                                                                                                                                                                                                                                                                                                          |
|-------------|------|----------------------------------------------------------------------------------------------------------------------------------------------------------------------------------------------------------------------------------------------------------------------------------------------------------------------------------------------------------|
| 217992_s_at | 2.36 | gb:NM_024329.1 /DEF=Homo sapiens hypothetical protein MGC4342 (MGC4342), mRNA. /FEA=mRNA /GEN=MGC4342 /PROD=hypothetical protein MGC4342 /DB_XREF=gi:13443015 /UG=Hs.301342 hypothetical protein MGC4342 /FL=gb:BC003033.1 gb:NM_024329.1                                                                                                                |
| 202510_s_at | 2.36 | gb:NM_006291.1 /DEF=Homo sapiens tumor necrosis factor, alpha-induced protein 2 (TNFAIP2), mRNA. /FEA=mRNA /GEN=TNFAIP2 /PROD=tumor necrosis factor, alpha-induced protein 2 /DB_XREF=gi:5454133 /UG=Hs.101382 tumor necrosis factor, alpha-induced protein 2 /FL=gb:M92357.1 gb:NM_006291.1                                                             |
| 209440_at   | 2.35 | gb:BC001605.1 /DEF=Homo sapiens, phosphoribosyl pyrophosphate synthetase 1, clone MGC:2256, mRNA, complete cds. /FEA=mRNA /PROD=phosphoribosyl pyrophosphate synthetase 1 /DB_XREF=gi:12804406 /UG=Hs.56 phosphoribosyl pyrophosphate synthetase 1 /FL=gb:BC001605.1 gb:D00860.1                                                                         |
| 210524_x_at | 2.35 | gb:AF078844.1 /DEF=Homo sapiens hqp0376 protein mRNA, complete cds. /FEA=mRNA /PROD=hqp0376 protein /DB_XREF=gi:6683748 /UG=Hs.8765 RNA helicase-related protein /FL=gb:AF078844.1                                                                                                                                                                       |
| 203434_s_at | 2.34 | Consensus includes gb:AI433463 /FEA=EST /DB_XREF=gi:4289355 /DB_XREF=est:ti65g11.x1 /CLONE=IMAGE:2136932 /UG=Hs.1298 membrane metallo-endopeptidase (neutral endopeptidase, enkephalinase, CALLA, CD10) /FL=gb:J03779.1 gb:NM_007287.1 gb:NM_007288.1                                                                                                    |
| 206569_at   | 2.34 | gb:NM_006850.1 /DEF=Homo sapiens suppression of tumorigenicity 16 (melanoma differentiation) (ST16), mRNA. /FEA=mRNA /GEN=ST16 /PROD=suppression of tumorigenicity 16 (melanomadifferentiation) /DB_XREF=gi:5803085 /UG=Hs.315463 suppression of tumorigenicity 16 (melanoma differentiation) /FL=gb:U16261.1 gb:NM_006850.1                             |
| 209156_s_at | 2.34 | gb:AY029208.1 /DEF=Homo sapiens type VI collagen alpha 2 chain precursor (COL6A2) mRNA, complete cds, alternatively spliced. /FEA=mRNA /GEN=COL6A2 /PROD=type VI collagen alpha 2 chain precursor /DB_XREF=gi:13603393 /UG=Hs.159263 collagen, type VI, alpha 2 /FL=gb:AY029208.1                                                                        |
| 216606_x_at | 2.33 | Consensus includes gb:AL050332 /DEF=Human DNA sequence from clone RP4-570F3 on chromosome 6 Contains a gene similar to Rattus norvegicus synaptic ras GTPase-activating protein p135, the CICK0721Q.5 (polypeptide from patented cDNA Em:E06811) gene, the PHF1 (PHD finger protein 1) gen... /FEA=mRNA_1 /DB_XREF=gi:6010176 /UG=Hs.306238 acyl-protein |
| 207850_at   | 2.33 | gb:NM_002090.1 /DEF=Homo sapiens GRO3 oncogene (GRO3), mRNA. /FEA=mRNA /GEN=GRO3 /PROD=GRO3 oncogene /DB_XREF=gi:4504156 /UG=Hs.89690 GRO3 oncogene /FL=gb:M36821.1 gb:NM_002090.1                                                                                                                                                                       |
| 218154_at   | 2.33 | gb:NM_024736.1 /DEF=Homo sapiens hypothetical protein FLJ12150 (FLJ12150), mRNA. /FEA=mRNA /GEN=FLJ12150 /PROD=hypothetical protein FLJ12150 /DB_XREF=gi:13376057 /UG=Hs.118983 hypothetical protein FLJ12150 /FL=gb:NM_024736.1                                                                                                                         |
| 202757_at   | 2.33 | gb:NM_015456.1 /DEF=Homo sapiens DKFZP586B0519 protein (DKFZP586B0519), mRNA. /FEA=mRNA /GEN=DKFZP586B0519 /PROD=DKFZP586B0519 protein /DB_XREF=gi:7661663 /UG=Hs.27633 DKFZP586B0519 protein /FL=gb:AL050280.1 gb:NM_015456.1                                                                                                                           |
| 201618_x_at | 2.33 | gb:NM_003801.2 /DEF=Homo sapiens anchor attachment protein 1 (Gaa1p, yeast) homolog (GPAA1), mRNA. /FEA=mRNA /GEN=GPAA1 /PROD=anchor attachment protein 1 /DB_XREF=gi:6031166 /UG=Hs.4742 anchor attachment protein 1 (Gaa1p, yeast) homolog /FL=gb:BC003171.1 gb:BC004129.1 gb:AB006969.1 gb:AB002135.1 gb:NM_003801.2                                  |
| 209318_x_at | 2.33 | Consensus includes gb:BG547855 /FEA=EST /DB_XREF=gi:13546520 /DB_XREF=est:602576153F1 /CLONE=IMAGE:4704108 /UG=Hs.75825 pleiomorphic adenoma gene-like 1 /FL=gb:U72621.3                                                                                                                                                                                 |
| 209715_at   | 2.32 | gb:L07515.1 /DEF=Human heterochromatin protein homologue (HP1) mRNA, complete cds. /FEA=mRNA /DB_XREF=gi:184310 /UG=Hs.89232 chromobox homolog 5 (Drosophila HP1 alpha) /FL=gb:L07515.1 gb:NM_012117.1                                                                                                                                                   |



|             |      |                                                                                                                                                                                                                                                                                                                                                                                                                         |
|-------------|------|-------------------------------------------------------------------------------------------------------------------------------------------------------------------------------------------------------------------------------------------------------------------------------------------------------------------------------------------------------------------------------------------------------------------------|
| 212464_s_at | 2.32 | Consensus includes gb:X02761.1 /DEF=Human mRNA for fibronectin (FN precursor). /FEA=mRNA /PROD=fibronectin precursor /DB_XREF=gi:31396 /UG=Hs.287820 fibronectin 1                                                                                                                                                                                                                                                      |
| 201369_s_at | 2.32 | gb:NM_006887.1 /DEF=Homo sapiens butyrate response factor 2 (EGF-response factor 2) (BRF2), mRNA. /FEA=mRNA /GEN=BRF2 /PROD=butyrate response factor 2 (EGF-response factor2) /DB_XREF=gi:5901899 /UG=Hs.78909 butyrate response factor 2 (EGF-response factor 2) /FL=gb:BC005010.1 gb:NM_006887.1                                                                                                                      |
| 209708_at   | 2.31 | gb:AY007239.1 /DEF=Homo sapiens monooxygenase X mRNA, complete cds. /FEA=mRNA /PROD=monooxygenase X /DB_XREF=gi:9988949 /UG=Hs.6909 DKFZP564G202 protein /FL=gb:AY007239.1                                                                                                                                                                                                                                              |
| 218280_x_at | 2.31 | gb:NM_003516.1 /DEF=Homo sapiens H2A histone family, member O (H2AFO), mRNA. /FEA=mRNA /GEN=H2AFO /PROD=H2A histone family, member O /DB_XREF=gi:4504250 /UG=Hs.795 H2A histone family, member O /FL=gb:BC001629.1 gb:L19779.1 gb:NM_003516.1                                                                                                                                                                           |
| 205364_at   | 2.31 | gb:NM_003500.1 /DEF=Homo sapiens acyl-Coenzyme A oxidase 2, branched chain (ACOX2), mRNA. /FEA=mRNA /GEN=ACOX2 /PROD=acyl-Coenzyme A oxidase 2, branched chain /DB_XREF=gi:4501868 /UG=Hs.9795 acyl-Coenzyme A oxidase 2, branched chain /FL=gb:NM_003500.1                                                                                                                                                             |
| 212082_s_at | 2.31 | Consensus includes gb:BE734356 /FEA=EST /DB_XREF=gi:10148348 /DB_XREF=est:601565603F1 /CLONE=IMAGE:3840385 /UG=Hs.77385 myosin, light polypeptide 6, alkali, smooth muscle and non-muscle                                                                                                                                                                                                                               |
| 208625_s_at | 2.31 | gb:AF104913.1 /DEF=Homo sapiens eukaryotic protein synthesis initiation factor mRNA, complete cds. /FEA=mRNA /PROD=eukaryotic protein synthesis initiation factor /DB_XREF=gi:3941723 /UG=Hs.211568 eukaryotic translation initiation factor 4 gamma, 1 /FL=gb:AF104913.1                                                                                                                                               |
| 211573_x_at | 2.31 | gb:M98478.1 /DEF=Human transglutaminase mRNA, complete cds. /FEA=mRNA /PROD=transglutaminase /DB_XREF=gi:339577 /UG=Hs.8265 transglutaminase 2 (C polypeptide, protein-glutamine-gamma-glutamyltransferase) /FL=gb:M98478.1                                                                                                                                                                                             |
| 218681_s_at | 2.31 | gb:NM_022044.1 /DEF=Homo sapiens stromal cell-derived factor 2-like 1 (SDF2L1), mRNA. /FEA=mRNA /GEN=SDF2L1 /PROD=stromal cell-derived factor 2-like 1 /DB_XREF=gi:11545742 /UG=Hs.303116 stromal cell-derived factor 2-like 1 /FL=gb:AB043007.1 gb:NM_022044.1                                                                                                                                                         |
| 204559_s_at | 2.3  | gb:NM_016199.1 /DEF=Homo sapiens U6 snRNA-associated Sm-like protein LSm7 (LOC51690), mRNA. /FEA=mRNA /GEN=LOC51690 /PROD=U6 snRNA-associated Sm-like protein LSm7 /DB_XREF=gi:7706422 /UG=Hs.70830 U6 snRNA-associated Sm-like protein LSm7 /FL=gb:AF182293.1 gb:NM_016199.1                                                                                                                                           |
| 37012_at    | 2.3  | Cluster Incl. U03271:Human F-actin capping protein beta subunit mRNA, complete cds /cds=(0,818) /gb=U03271 /gi=595256 /ug=Hs.76368 /len=1077                                                                                                                                                                                                                                                                            |
| 220189_s_at | 2.3  | gb:NM_014275.1 /DEF=Homo sapiens mannosyl (alpha-1,3-)-glycoprotein beta-1,4-N-acetylglucosaminyltransferase, isoenzyme B (MGAT4B), mRNA. /FEA=mRNA /GEN=MGAT4B /PROD=mannosyl (alpha-1,3-)-glycoproteinbeta-1,4-N-acetylglucosaminyltransferase, isoenzyme B /DB_XREF=gi:7710151 /UG=Hs.4867 mannosyl (alpha-1,3-)-glycoprotein beta-1,4-N-acetylglucosaminyltransferase, isoenzyme B /FL=gb:AB000624.1 gb:NM_014275.1 |
| 209263_x_at | 2.29 | gb:BC000389.1 /DEF=Homo sapiens, transmembrane 4 superfamily member 7, clone MGC:8437, mRNA, complete cds. /FEA=mRNA /PROD=transmembrane 4 superfamily member 7 /DB_XREF=gi:12653240 /UG=Hs.26518 transmembrane 4 superfamily member 7 /FL=gb:BC000389.1 gb:AF022813.1 gb:AF054841.1 gb:NM_003271.1                                                                                                                     |
| 200078_s_at | 2.29 | gb:BC005876.1 /DEF=Homo sapiens, ATPase, H+ transporting, lysosomal (vacuolar proton pump) 21kD, clone MGC:4498, mRNA, complete cds. /FEA=mRNA /PROD=ATPase, H+ transporting, lysosomal (vacuolarproton pump) 21kD /DB_XREF=gi:13543437 /FL=gb:BC005876.1                                                                                                                                                               |
| 203300_x_at | 2.29 | gb:NM_003916.1 /DEF=Homo sapiens adaptor-related protein complex 1, sigma 2 subunit (AP1S2), mRNA. /FEA=mRNA /GEN=AP1S2 /PROD=adaptor-related protein complex 1, sigma 2subunit /DB_XREF=gi:4506956                                                                                                                                                                                                                     |

|                                 |      |                                                                                                                                                                                                                                                                                                        |
|---------------------------------|------|--------------------------------------------------------------------------------------------------------------------------------------------------------------------------------------------------------------------------------------------------------------------------------------------------------|
|                                 |      | /UG=Hs.40368 adaptor-related protein complex 1, sigma 2 subunit /FL=gb:AF251295.1 gb:BC001117.1<br>gb:AB015320.1 gb:NM_003916.1                                                                                                                                                                        |
| 220734_s_at                     | 2.28 | gb:NM_030575.1 /DEF=Homo sapiens hypothetical protein MGC10334 (MGC10334), mRNA. /FEA=mRNA<br>/GEN=MGC10334 /PROD=hypothetical protein MGC10334 /DB_XREF=gi:13386487 /UG=Hs.302446 hypothetical<br>protein MGC10334 /FL=gb:BC004366.1 gb:NM_030575.1                                                   |
| 201185_at                       | 2.28 | gb:NM_002775.1 /DEF=Homo sapiens protease, serine, 11 (IGF binding) (PRSS11), mRNA. /FEA=mRNA<br>/GEN=PRSS11 /PROD=protease, serine, 11 (IGF binding) /DB_XREF=gi:4506140 /UG=Hs.75111 protease,<br>serine, 11 (IGF binding) /FL=gb:D87258.1 gb:NM_002775.1                                            |
| 201393_s_at                     | 2.28 | gb:NM_000876.1 /DEF=Homo sapiens insulin-like growth factor 2 receptor (IGF2R), mRNA. /FEA=mRNA<br>/GEN=IGF2R /PROD=insulin-like growth factor 2 receptor /DB_XREF=gi:4504610 /UG=Hs.76473 insulin-like<br>growth factor 2 receptor /FL=gb:J03528.1 gb:NM_000876.1                                     |
| 202669_s_at                     | 2.27 | gb:U16797.1 /DEF=Human LERK-5 (EPLG5) mRNA, complete cds. /FEA=mRNA /GEN=EPLG5 /PROD=LERK-5<br>/DB_XREF=gi:902370 /UG=Hs.30942 ephrin-B2 /FL=gb:U81262.1 gb:NM_004093.1 gb:L38734.1 gb:U16797.1                                                                                                        |
| AFFX-<br>HSAC07/X00351<br>_5_at | 2.27 | X00351 Human mRNA for beta-actin (_5, _M, _3 represent transcript regions 5 prime, Middle, and 3 prime<br>respectively)                                                                                                                                                                                |
| 202206_at                       | 2.27 | Consensus includes gb:AW450363 /FEA=EST /DB_XREF=gi:6991139 /DB_XREF=est:UI-H-BI3-akn-d-02-0-UI.s1<br>/CLONE=IMAGE:2734875 /UG=Hs.111554 ADP-ribosylation factor-like 7 /FL=gb:BC001051.1 gb:AB016811.1<br>gb:NM_005737.2                                                                              |
| 200632_s_at                     | 2.26 | gb:NM_006096.1 /DEF=Homo sapiens N-myc downstream regulated (NDRG1), mRNA. /FEA=mRNA<br>/GEN=NDRG1 /PROD=N-myc downstream regulated /DB_XREF=gi:5174656 /UG=Hs.75789 N-myc downstream<br>regulated /FL=gb:BC003175.1 gb:D87953.1 gb:AF004162.1 gb:NM_006096.1                                          |
| 217766_s_at                     | 2.26 | gb:NM_014313.1 /DEF=Homo sapiens small membrane protein 1 (SMP1), mRNA. /FEA=mRNA /GEN=SMP1<br>/PROD=small membrane protein 1 /DB_XREF=gi:7657594 /UG=Hs.107979 small membrane protein 1<br>/FL=gb:AL136627.1 gb:AF081282.1 gb:NM_014313.1                                                             |
| 204175_at                       | 2.25 | gb:NM_015871.1 /DEF=Homo sapiens zinc finger protein (LOC51042), mRNA. /FEA=mRNA /GEN=LOC51042<br>/PROD=zinc finger protein /DB_XREF=gi:7705661 /UG=Hs.102419 zinc finger protein /FL=gb:BC002580.1<br>gb:D45213.1 gb:NM_015871.1                                                                      |
| 207172_s_at                     | 2.25 | gb:NM_001797.1 /DEF=Homo sapiens cadherin 11, type 2, OB-cadherin (osteoblast) (CDH11), mRNA.<br>/FEA=mRNA /GEN=CDH11 /PROD=cadherin 11, type 2, OB-cadherin (osteoblast) /DB_XREF=gi:4502716<br>/UG=Hs.75929 cadherin 11, type 2, OB-cadherin (osteoblast) /FL=gb:NM_001797.1 gb:L34056.1 gb:D21254.1 |
| 212647_at                       | 2.24 | Consensus includes gb:NM_006270.1 /DEF=Homo sapiens related RAS viral (r-ras) oncogene homolog (RRAS),<br>mRNA. /FEA=CDS /GEN=RRAS /PROD=related RAS viral (r-ras) oncogene homolog /DB_XREF=gi:5454027<br>/UG=Hs.9651 related RAS viral (r-ras) oncogene homolog /FL=gb:NM_006270.1                   |
| 215101_s_at                     | 2.24 | Consensus includes gb:BG166705 /FEA=EST /DB_XREF=gi:12673408 /DB_XREF=est:602339217F1<br>/CLONE=IMAGE:4447013 /UG=Hs.89714 small inducible cytokine subfamily B (Cys-X-Cys), member 5 (epithelial-<br>derived neutrophil-activating peptide 78)                                                        |
| 200787_s_at                     | 2.24 | gb:BC002426.1 /DEF=Homo sapiens, phosphoprotein enriched in astrocytes 15, clone MGC:1685, mRNA,<br>complete cds. /FEA=mRNA /PROD=phosphoprotein enriched in astrocytes 15 /DB_XREF=gi:12803230<br>/UG=Hs.194673 phosphoprotein enriched in astrocytes 15 /FL=gb:BC002426.1 gb:NM_003768.1             |
| 201109_s_at                     | 2.23 | Consensus includes gb:AV726673 /FEA=EST /DB_XREF=gi:10836094 /DB_XREF=est:AV726673<br>/CLONE=HTCBGC12 /UG=Hs.87409 thrombospondin 1 /FL=gb:NM_003246.1                                                                                                                                                 |
| 201245_s_at                     | 2.23 | Consensus includes gb:AL523776 /FEA=EST /DB_XREF=gi:12787269 /DB_XREF=est:AL523776                                                                                                                                                                                                                     |

|             |      |                                                                                                                                                                                                                                                                                                                                                                                                     |
|-------------|------|-----------------------------------------------------------------------------------------------------------------------------------------------------------------------------------------------------------------------------------------------------------------------------------------------------------------------------------------------------------------------------------------------------|
| 205743_at   | 2.23 | /CLONE=CS0DC003YC23 (5 prime) /UG=Hs.108504 hypothetical protein FLJ20113 /FL=gb:NM_017670.1<br>gb:NM_003149.1 /DEF=Homo sapiens src homology three (SH3) and cysteine rich domain (STAC), mRNA.<br>/FEA=mRNA /GEN=STAC /PROD=src homology three (SH3) and cysteine richdomain /DB_XREF=gi:4507246<br>/UG=Hs.56045 src homology three (SH3) and cysteine rich domain /FL=gb:D86640.1 gb:NM_003149.1 |
| 208688_x_at | 2.23 | gb:U78525.1 /DEF=Homo sapiens eukaryotic translation initiation factor (eIF3) mRNA, complete cds. /FEA=mRNA<br>/GEN=eIF3 /PROD=eukaryotic translation initiation factor /DB_XREF=gi:2558667 /UG=Hs.57783 eukaryotic<br>translation initiation factor 3, subunit 9 (eta, 116kD) /FL=gb:U78525.1                                                                                                      |
| 221263_s_at | 2.23 | gb:NM_031287.1 /DEF=Homo sapiens hypothetical protein MGC3133 (MGC3133), mRNA. /FEA=mRNA<br>/GEN=MGC3133 /PROD=hypothetical protein MGC3133 /DB_XREF=gi:13775199 /FL=gb:NM_031287.1                                                                                                                                                                                                                 |
| 200885_at   | 2.22 | gb:NM_005167.1 /DEF=Homo sapiens ras homolog gene family, member C (ARHC), mRNA. /FEA=mRNA<br>/GEN=ARHC /PROD=ras homolog gene family, member C /DB_XREF=gi:4885066 /UG=Hs.179735 ras homolog<br>gene family, member C /FL=gb:L25081.1 gb:NM_005167.1                                                                                                                                               |
| 36936_at    | 2.22 | Cluster Incl. U58766:Human FX protein mRNA, complete cds /cds=(74,1039) /gb=U58766 /gi=1381178<br>/ug=Hs.75801 /len=1330                                                                                                                                                                                                                                                                            |
| 218636_s_at | 2.22 | gb:NM_016219.1 /DEF=Homo sapiens alpha 1,2-mannosidase (LOC51697), mRNA. /FEA=mRNA<br>/GEN=LOC51697 /PROD=alpha 1,2-mannosidase /DB_XREF=gi:7706436 /UG=Hs.279881 alpha 1,2-mannosidase<br>/FL=gb:BC002953.1 gb:AF148509.1 gb:NM_016219.1                                                                                                                                                           |
| 202123_s_at | 2.22 | gb:NM_005157.2 /DEF=Homo sapiens v-abl Abelson murine leukemia viral oncogene homolog 1 (ABL1), transcript<br>variant a, mRNA. /FEA=mRNA /GEN=ABL1 /PROD=v-abl Abelson murine leukemia viral oncogenehomolog 1<br>isoform a /DB_XREF=gi:6382056 /UG=Hs.146355 v-abl Abelson murine leukemia viral oncogene homolog 1<br>/FL=gb:M14752.1 gb:NM_005157.2                                              |
| 202587_s_at | 2.22 | gb:BC001116.1 /DEF=Homo sapiens, adenylate kinase 1, clone MGC:1808, mRNA, complete cds. /FEA=mRNA<br>/PROD=adenylate kinase 1 /DB_XREF=gi:12654562 /UG=Hs.76240 adenylate kinase 1 /FL=gb:BC001116.1<br>gb:NM_000476.1 gb:AB021871.1                                                                                                                                                               |
| 212430_at   | 2.22 | Consensus includes gb:AL109955 /DEF=Human DNA sequence from clone RP4-800J21 on chromosome 20<br>Contains ESTs, STSs, GSSs and CpG islands. Contains the 3 part of the RAE1 gene for a homolog to RNA export<br>protein 1 from S.pombe and the gene for the ssDNA binding protein SEB4D.n /FEA=mRNA_1<br>/DB_XREF=gi:11558768 /UG=Hs.236361 seb4D                                                   |
| 212016_s_at | 2.21 | Consensus includes gb:AA679988 /FEA=EST /DB_XREF=gi:2656455 /DB_XREF=est:ag51f11.s1<br>/CLONE=IMAGE:1126509 /UG=Hs.172550 polypyrimidine tract binding protein (heterogeneous nuclear<br>ribonucleoprotein I)                                                                                                                                                                                       |
| 218188_s_at | 2.21 | gb:NM_012458.1 /DEF=Homo sapiens translocase of inner mitochondrial membrane 13 (yeast) homolog B<br>(TIMM13B), mRNA. /FEA=mRNA /GEN=TIMM13B /PROD=translocase of inner mitochondrial membrane<br>13(yeast) homolog B /DB_XREF=gi:11024699 /UG=Hs.23410 translocase of inner mitochondrial membrane 13<br>(yeast) homolog B /FL=gb:NM_012458.1 gb:AF144700.1 gb:AF152352.1                          |
| 203054_s_at | 2.21 | gb:NM_022171.1 /DEF=Homo sapiens T-cell leukemia translocation altered gene (TCTA), mRNA. /FEA=mRNA<br>/GEN=TCTA /PROD=T-cell leukemia translocation altered gene /DB_XREF=gi:11560140 /UG=Hs.250894 T-cell<br>leukemia translocation altered gene /FL=gb:NM_022171.1 gb:BC005157.1                                                                                                                 |
| 216841_s_at | 2.21 | Consensus includes gb:X15132.1 /DEF=Human mRNA for manganese containing superoxide dismutase (EC<br>1.15.1.1). /FEA=mRNA /DB_XREF=gi:34794 /UG=Hs.318885 superoxide dismutase 2, mitochondrial                                                                                                                                                                                                      |
| 205498_at   | 2.2  | gb:NM_000163.1 /DEF=Homo sapiens growth hormone receptor (GHR), mRNA. /FEA=mRNA /GEN=GHR<br>/PROD=growth hormone receptor /DB_XREF=gi:4503992 /UG=Hs.125180 growth hormone receptor<br>/FL=gb:NM_000163.1                                                                                                                                                                                           |

|             |      |                                                                                                                                                                                                                                                                                                                                                                              |
|-------------|------|------------------------------------------------------------------------------------------------------------------------------------------------------------------------------------------------------------------------------------------------------------------------------------------------------------------------------------------------------------------------------|
| 201578_at   | 2.2  | gb:NM_005397.1 /DEF=Homo sapiens podocalyxin-like (PODXL), mRNA. /FEA=mRNA /GEN=PODXL /PROD=podocalyxin-like /DB_XREF=gi:4885556 /UG=Hs.16426 podocalyxin-like /FL=gb:U97519.1 gb:NM_005397.1                                                                                                                                                                                |
| 203767_s_at | 2.2  | Consensus includes gb:A1122754 /FEA=EST /DB_XREF=gi:3538520 /DB_XREF=est:qa48e01.x1 /CLONE=IMAGE:1690008 /UG=Hs.79876 steroid sulfatase (microsomal), arylsulfatase C, isozyme S /FL=gb:NM_000351.2 gb:M16505.1 gb:J04964.1                                                                                                                                                  |
| 211060_x_at | 2.19 | gb:BC006383.1 /DEF=Homo sapiens, clone MGC:12663, mRNA, complete cds. /FEA=mRNA /PROD=Unknown (protein for MGC:12663) /DB_XREF=gi:13623546 /FL=gb:BC006383.1                                                                                                                                                                                                                 |
| 201541_s_at | 2.19 | gb:NM_006349.1 /DEF=Homo sapiens putative cyclin G1 interacting protein (CG1I), mRNA. /FEA=mRNA /GEN=CG1I /PROD=putative cyclin G1 interacting protein /DB_XREF=gi:5453616 /UG=Hs.10028 putative cyclin G1 interacting protein /FL=gb:U61837.1 gb:NM_006349.1                                                                                                                |
| 201168_x_at | 2.19 | gb:NM_004309.1 /DEF=Homo sapiens Rho GDP dissociation inhibitor (GDI) alpha (ARHGDI), mRNA. /FEA=mRNA /GEN=ARHGDI /PROD=Rho GDP dissociation inhibitor (GDI) alpha /DB_XREF=gi:4757767 /UG=Hs.159161 Rho GDP dissociation inhibitor (GDI) alpha /FL=gb:D13989.1 gb:M97579.1 gb:NM_004309.1                                                                                   |
| 219500_at   | 2.19 | gb:NM_013246.1 /DEF=Homo sapiens cardiotrophin-like cytokine; neurotrophin-1B-cell stimulating factor-3 (CLC), mRNA. /FEA=mRNA /GEN=CLC /PROD=cardiotrophin-like cytokine; neurotrophin-1B-cell stimulating factor-3 /DB_XREF=gi:7019350 /UG=Hs.132004 cardiotrophin-like cytokine; neurotrophin-1B-cell stimulating factor-3 /FL=gb:AF172854.1 gb:AF176911.1 gb:NM_013246.1 |
| 211358_s_at | 2.18 | gb:AF234161.1 /DEF=Homo sapiens nuclear protein NP94b (NP94) mRNA, complete cds, alternatively spliced. /FEA=mRNA /GEN=NP94 /PROD=nuclear protein NP94b /DB_XREF=gi:7188807 /UG=Hs.23476 Cip1-interacting zinc finger protein /FL=gb:AF234161.1                                                                                                                              |
| 202424_at   | 2.17 | gb:NM_030662.1 /DEF=Homo sapiens mitogen-activated protein kinase kinase 2 (MAP2K2), mRNA. /FEA=mRNA /GEN=MAP2K2 /PROD=mitogen-activated protein kinase kinase 2 /DB_XREF=gi:13489053 /UG=Hs.72241 mitogen-activated protein kinase kinase 2 /FL=gb:BC000471.1 gb:NM_030662.1                                                                                                |
| 218770_s_at | 2.17 | gb:NM_018056.1 /DEF=Homo sapiens hypothetical protein FLJ10315 (FLJ10315), mRNA. /FEA=mRNA /GEN=FLJ10315 /PROD=hypothetical protein FLJ10315 /DB_XREF=gi:8922347 /UG=Hs.25544 hypothetical protein FLJ10315 /FL=gb:AL136695.1 gb:NM_018056.1                                                                                                                                 |
| 211284_s_at | 2.17 | gb:BC000324.1 /DEF=Homo sapiens, Similar to granulin, clone MGC:8480, mRNA, complete cds. /FEA=mRNA /PROD=Similar to granulin /DB_XREF=gi:12653114 /UG=Hs.180577 granulin /FL=gb:BC000324.1                                                                                                                                                                                  |
| 202096_s_at | 2.16 | gb:NM_000714.2 /DEF=Homo sapiens benzodiazapine receptor (peripheral) (BZRP), nuclear gene encoding mitochondrial protein, transcript variant PBR, mRNA. /FEA=mRNA /GEN=BZRP /PROD=peripheral benzodiazapine receptor /DB_XREF=gi:6382068 /UG=Hs.202 benzodiazapine receptor (peripheral) /FL=gb:BC001110.1 gb:M36035.1 gb:NM_000714.2                                       |
| 217949_s_at | 2.16 | gb:NM_024006.1 /DEF=Homo sapiens hypothetical protein IMAGE3455200 (IMAGE3455200), mRNA. /FEA=mRNA /GEN=IMAGE3455200 /PROD=hypothetical protein IMAGE3455200 /DB_XREF=gi:13124769 /UG=Hs.324844 hypothetical protein IMAGE3455200 /FL=gb:BC002911.1 gb:NM_024006.1                                                                                                           |
| 201115_at   | 2.16 | gb:NM_006230.1 /DEF=Homo sapiens polymerase (DNA directed), delta 2, regulatory subunit (50kD) (POLD2), mRNA. /FEA=mRNA /GEN=POLD2 /PROD=polymerase (DNA directed), delta 2, regulatory subunit (50kD) /DB_XREF=gi:5453923 /UG=Hs.74598 polymerase (DNA directed), delta 2, regulatory subunit (50kD) /FL=gb:U21090.1 gb:BC000459.1 gb:NM_006230.1                           |
| 210428_s_at | 2.16 | gb:AF260566.1 /DEF=Homo sapiens hepatocyte growth factor-regulated tyrosine kinase substrate HRS isoform 2 (HRS) mRNA, complete cds. /FEA=mRNA /GEN=HRS /PROD=hepatocyte growth factor-regulated tyrosinekinase substrate HRS isoform 2 /DB_XREF=gi:9022388 /UG=Hs.24756 hepatocyte growth factor-regulated tyrosine                                                         |

|             |      |                                                                                                                                                                                                                                                                                                                                                                                                                                                        |
|-------------|------|--------------------------------------------------------------------------------------------------------------------------------------------------------------------------------------------------------------------------------------------------------------------------------------------------------------------------------------------------------------------------------------------------------------------------------------------------------|
| 202888_s_at | 2.16 | kinase substrate /FL=gb:AF260566.1<br>gb:NM_001150.1 /DEF=Homo sapiens alanyl (membrane) aminopeptidase (aminopeptidase N, aminopeptidase M, microsomal aminopeptidase, CD13, p150) (ANPEP), mRNA. /FEA=mRNA /GEN=ANPEP /PROD=membrane alanine aminopeptidase precursor /DB_XREF=gi:4502094 /UG=Hs.1239 alanyl (membrane) aminopeptidase (aminopeptidase N, aminopeptidase M, microsomal aminopeptidase, CD13, p150) /FL=gb:M22324.1<br>gb:NM_001150.1 |
| 209821_at   | 2.15 | gb:AB024518.1 /DEF=Homo sapiens mRNA for DVS27-related protein, complete cds. /FEA=mRNA /GEN=DVS27 /PROD=DVS27-related protein /DB_XREF=gi:4520327 /UG=Hs.58589 glycogenin 2 /FL=gb:AB024518.1                                                                                                                                                                                                                                                         |
| 210042_s_at | 2.15 | gb:AF073890.1 /DEF=Homo sapiens cathepsin X precursor, mRNA, complete cds. /FEA=mRNA /PROD=cathepsin X precursor /DB_XREF=gi:3650497 /UG=Hs.252549 cathepsin Z /FL=gb:AF032906.1 gb:AF073890.1<br>gb:NM_001336.1 gb:AF136273.1                                                                                                                                                                                                                         |
| 201801_s_at | 2.15 | gb:AF079117.1 /DEF=Homo sapiens equilibrative NBMPR-sensitive nucleoside transporter (ENT1) mRNA, complete cds. /FEA=mRNA /GEN=ENT1 /PROD=equilibrative NBMPR-sensitive nucleosidetransporter /DB_XREF=gi:3694939 /UG=Hs.25450 solute carrier family 29 (nucleoside transporters), member 1 /FL=gb:BC001382.1 gb:U81375.1 gb:AF079117.1 gb:NM_004955.1                                                                                                 |
| 204257_at   | 2.14 | gb:NM_021727.1 /DEF=Homo sapiens fatty acid desaturase 3 (FADS3), mRNA. /FEA=mRNA /GEN=FADS3 /PROD=fatty acid desaturase 3 /DB_XREF=gi:13375615 /UG=Hs.21765 fatty acid desaturase 3 /FL=gb:AF084560.1 gb:NM_021727.1 gb:BC004901.1 gb:AF134404.1                                                                                                                                                                                                      |
| 204604_at   | 2.14 | gb:NM_012395.1 /DEF=Homo sapiens PFTAIRE protein kinase 1 (PFTK1), mRNA. /FEA=mRNA /GEN=PFTK1 /PROD=PFTAIRE protein kinase 1 /DB_XREF=gi:6912583 /UG=Hs.57856 PFTAIRE protein kinase 1 /FL=gb:AB020641.1 gb:NM_012395.1                                                                                                                                                                                                                                |
| 65884_at    | 2.14 | Cluster Incl. AA631254:nq81c12.s1 Homo sapiens cDNA, 3 end /clone=IMAGE-1158742 /clone_end=3 /gb=AA631254 /gi=2553865 /ug=Hs.4814 /len=876                                                                                                                                                                                                                                                                                                             |
| 212554_at   | 2.13 | Consensus includes gb:N90755 /FEA=EST /DB_XREF=gi:1444082 /DB_XREF=est:zb22c08.s1 /CLONE=IMAGE:302798 /UG=Hs.296341 adenylyl cyclase-associated protein 2 /FL=gb:U02390.1<br>gb:NM_006366.1                                                                                                                                                                                                                                                            |
| 212386_at   | 2.13 | Consensus includes gb:BF592782 /FEA=EST /DB_XREF=gi:11685106 /DB_XREF=est:7j94d06.x1 /CLONE=IMAGE:3442594 /UG=Hs.289068 Homo sapiens cDNA FLJ11918 fis, clone HEMBB1000272                                                                                                                                                                                                                                                                             |
| 209373_at   | 2.13 | gb:BC003179.1 /DEF=Homo sapiens, clone MGC:4419, mRNA, complete cds. /FEA=mRNA /PROD=Unknown (protein for MGC:4419) /DB_XREF=gi:13112010 /UG=Hs.185055 BENE protein /FL=gb:BC003179.1<br>gb:NM_005434.1                                                                                                                                                                                                                                                |
| 209260_at   | 2.12 | gb:BC000329.1 /DEF=Homo sapiens, stratifin, clone MGC:8516, mRNA, complete cds. /FEA=mRNA /PROD=stratifin /DB_XREF=gi:12653124 /UG=Hs.184510 stratifin /FL=gb:BC000329.1 gb:BC000995.2<br>gb:BC002995.1 gb:M93010.1 gb:AF029082.1 gb:NM_006142.1                                                                                                                                                                                                       |
| 219763_at   | 2.12 | gb:NM_024820.1 /DEF=Homo sapiens KIAA1608 protein (KIAA1608), mRNA. /FEA=mRNA /GEN=KIAA1608 /PROD=hypothetical protein FLJ21129 /DB_XREF=gi:13449264 /UG=Hs.300842 KIAA1608 protein /FL=gb:NM_024820.1                                                                                                                                                                                                                                                 |
| 208795_s_at | 2.12 | gb:D55716.1 /DEF=Human mRNA for P1cdc47, complete cds. /FEA=mRNA /GEN=P1cdc47 /PROD=P1cdc47 /DB_XREF=gi:1255616 /UG=Hs.77152 minichromosome maintenance deficient (S. cerevisiae) 7 /FL=gb:D55716.1                                                                                                                                                                                                                                                    |
| 201231_s_at | 2.12 | gb:NM_001428.1 /DEF=Homo sapiens enolase 1, (alpha) (ENO1), mRNA. /FEA=mRNA /GEN=ENO1 /PROD=enolase 1, (alpha) /DB_XREF=gi:4503570 /UG=Hs.254105 enolase 1, (alpha) /FL=gb:BC001810.1<br>gb:BC004458.1 gb:M14328.1 gb:NM_001428.1                                                                                                                                                                                                                      |
| 206595_at   | 2.11 | gb:NM_001323.1 /DEF=Homo sapiens cystatin EM (CST6), mRNA. /FEA=mRNA /GEN=CST6 /PROD=cystatin M                                                                                                                                                                                                                                                                                                                                                        |

|                        |      |                                                                                                                                                                                                                                                                                                                       |
|------------------------|------|-----------------------------------------------------------------------------------------------------------------------------------------------------------------------------------------------------------------------------------------------------------------------------------------------------------------------|
| 220607_x_at            | 2.11 | /DB_XREF=gi:4503112 /UG=Hs.83393 cystatin EM /FL=gb:U62800.1 gb:U81233.1 gb:NM_001323.1<br>gb:NM_016397.1 /DEF=Homo sapiens TH1 drosophila homolog (HSPC130), mRNA. /FEA=mRNA<br>/GEN=HSPC130 /PROD=TH1 drosophila homolog /DB_XREF=gi:7705462 /UG=Hs.5184 TH1 drosophila homolog<br>/FL=gb:AF161479.1 gb:NM_016397.1 |
| 211066_x_at            | 2.1  | gb:BC006439.1 /DEF=Homo sapiens, Similar to protocadherin gamma subfamily A, 5, clone MGC:13163, mRNA,<br>complete cds. /FEA=mRNA /PROD=Similar to protocadherin gamma subfamily A, 5 /DB_XREF=gi:13623638<br>/FL=gb:BC006439.1                                                                                       |
| 1053_at                | 2.1  | M87338 /FEATURE= /DEFINITION=HUMA1SBU Human replication factor C, 40-kDa subunit (A1) mRNA,<br>complete cds                                                                                                                                                                                                           |
| 213008_at              | 2.09 | Consensus includes gb:BG403615 /FEA=EST /DB_XREF=gi:13297063 /DB_XREF=est:602419331F1<br>/CLONE=IMAGE:4526406 /UG=Hs.80961 polymerase (DNA directed), gamma                                                                                                                                                           |
| 210517_s_at            | 2.09 | gb:AB003476.1 /DEF=Homo sapiens mRNA for gravin, complete cds. /FEA=mRNA /PROD=gravin<br>/DB_XREF=gi:2081606 /UG=Hs.788 A kinase (PRKA) anchor protein (gravin) 12 /FL=gb:AB003476.1                                                                                                                                  |
| 209204_at              | 2.08 | Consensus includes gb:A1824831 /FEA=EST /DB_XREF=gi:5445502 /DB_XREF=est:wb02d08.x1<br>/CLONE=IMAGE:2304495 /UG=Hs.3844 LIM domain only 4 /FL=gb:BC003600.1 gb:U24576.1 gb:NM_006769.2                                                                                                                                |
| 222036_s_at            | 2.08 | Consensus includes gb:A1859865 /FEA=EST /DB_XREF=gi:5513481 /DB_XREF=est:wm21f03.x1<br>/CLONE=IMAGE:2436605 /UG=Hs.154443 minichromosome maintenance deficient (S. cerevisiae) 4                                                                                                                                      |
| 213007_at              | 2.08 | Consensus includes gb:W74442 /FEA=EST /DB_XREF=gi:1384777 /DB_XREF=est:zd75e09.s1<br>/CLONE=IMAGE:346504 /UG=Hs.80961 polymerase (DNA directed), gamma                                                                                                                                                                |
| 215280_s_at            | 2.08 | Consensus includes gb:AK023850.1 /DEF=Homo sapiens cDNA FLJ13788 fis, clone SKNMC1000046, highly<br>similar to Homo sapiens liprin-alpha3 mRNA. /FEA=mRNA /DB_XREF=gi:10435912 /UG=Hs.109299 protein<br>tyrosine phosphatase, receptor type, f polypeptide (PTPRF), interacting protein (liprin), alpha 3             |
| 210978_s_at            | 2.07 | gb:BC002616.1 /DEF=Homo sapiens, transgelin 2, clone MGC:2989, mRNA, complete cds. /FEA=mRNA<br>/PROD=transgelin 2 /DB_XREF=gi:12803566 /UG=Hs.75725 transgelin 2 /FL=gb:BC002616.1                                                                                                                                   |
| 216242_x_at            | 2.07 | Consensus includes gb:AW402635 /FEA=EST /DB_XREF=gi:6921341 /DB_XREF=est:UI-HF-BK0-aav-a-09-0-<br>UI.r1 /CLONE=IMAGE:3055001 /UG=Hs.80475 polymerase (RNA) II (DNA directed) polypeptide J (13.3kD)                                                                                                                   |
| 210830_s_at            | 2.07 | gb:AF001602.1 /DEF=Homo sapiens paraoxonase (PON2) mRNA, with alternatively spliced exon 3, complete cds.<br>/FEA=mRNA /GEN=PON2 /PROD=paraoxonase /DB_XREF=gi:2228776 /UG=Hs.169857 paraoxonase 2<br>/FL=gb:AF001602.1                                                                                               |
| 212624_s_at            | 2.06 | Consensus includes gb:BF339445 /FEA=EST /DB_XREF=gi:11285900 /DB_XREF=est:602038795F1<br>/CLONE=IMAGE:4186582 /UG=Hs.169965 chimerin (chimaerin) 1                                                                                                                                                                    |
| 221830_at              | 2.06 | Consensus includes gb:A1302106 /FEA=EST /DB_XREF=gi:3961452 /DB_XREF=est:qn57h10.x1<br>/CLONE=IMAGE:1902403 /UG=Hs.301746 RAP2A, member of RAS oncogene family /FL=gb:NM_021033.1                                                                                                                                     |
| 217388_s_at            | 2.06 | Consensus includes gb:D55639.1 /DEF=Human monocyte PABL (pseudoautosomal boundary-like sequence)<br>mRNA, clone Mo1. /FEA=mRNA /DB_XREF=gi:1255614 /UG=Hs.169139 kynureninase (L-kynurenine hydrolase)                                                                                                                |
| 207943_x_at            | 2.06 | gb:NM_006718.1 /DEF=Homo sapiens pleiomorphic adenoma gene-like 1 (PLAGL1), transcript variant 2, mRNA.<br>/FEA=mRNA /GEN=PLAGL1 /PROD=pleiomorphic adenoma gene-like 1 isoform 2 /DB_XREF=gi:6031193<br>/UG=Hs.75825 pleiomorphic adenoma gene-like 1 /FL=gb:NM_006718.1                                             |
| 208336_s_at            | 2.06 | gb:NM_004868.1 /DEF=Homo sapiens glycoprotein, synaptic 2 (GPSN2), mRNA. /FEA=mRNA /GEN=GPSN2<br>/PROD=glycoprotein, synaptic 2 /DB_XREF=gi:4759061 /UG=Hs.306122 glycoprotein, synaptic 2<br>/FL=gb:AF038959.1 gb:NM_004868.1                                                                                        |
| AFFX-r2-<br>Hs18SrRNA- | 2.05 | M10098 Human 18S rRNA sequence, length 1969 bases, 3 prime target bases 1293-1938                                                                                                                                                                                                                                     |

|             |      |                                                                                                                                                                                                                                                                                          |
|-------------|------|------------------------------------------------------------------------------------------------------------------------------------------------------------------------------------------------------------------------------------------------------------------------------------------|
| 3_s_at      |      |                                                                                                                                                                                                                                                                                          |
| 212625_at   | 2.05 | Consensus includes gb:NM_003765.1 /DEF=Homo sapiens syntaxin 10 (STX10), mRNA. /FEA=CDS /GEN=STX10 /PROD=syntaxin 10 /DB_XREF=gi:4507284 /UG=Hs.43812 syntaxin 10 /FL=gb:AF035531.1 gb:NM_003765.1                                                                                       |
| 205588_s_at | 2.05 | gb:NM_007045.1 /DEF=Homo sapiens FGFR1 oncogene partner (FOP), mRNA. /FEA=mRNA /GEN=FOP /PROD=FGFR1 oncogene partner /DB_XREF=gi:5901953 /UG=Hs.180296 FGFR1 oncogene partner /FL=gb:NM_007045.1                                                                                         |
| 219493_at   | 2.04 | gb:NM_024745.1 /DEF=Homo sapiens hypothetical protein FLJ22009 (FLJ22009), mRNA. /FEA=mRNA /GEN=FLJ22009 /PROD=hypothetical protein FLJ22009 /DB_XREF=gi:13376069 /UG=Hs.123253 hypothetical protein FLJ22009 /FL=gb:NM_024745.1                                                         |
| 218111_s_at | 2.04 | gb:NM_018686.1 /DEF=Homo sapiens CMP-N-acetylneuraminic acid synthase (LOC55907), mRNA. /FEA=mRNA /GEN=LOC55907 /PROD=CMP-N-acetylneuraminic acid synthase /DB_XREF=gi:8923899 /UG=Hs.12492 CMP-N-acetylneuraminic acid synthase /FL=gb:AF271388.1 gb:NM_018686.1                        |
| 202954_at   | 2.04 | gb:NM_007019.1 /DEF=Homo sapiens ubiquitin carrier protein E2-C (UBCH10), mRNA. /FEA=mRNA /GEN=UBCH10 /PROD=ubiquitin carrier protein E2-C /DB_XREF=gi:5902145 /UG=Hs.93002 ubiquitin carrier protein E2-C /FL=gb:U73379.1 gb:NM_007019.1                                                |
| 214679_x_at | 2.04 | Consensus includes gb:AL110227.1 /DEF=Homo sapiens mRNA; cDNA DKFZp434J194 (from clone DKFZp434J194). /FEA=mRNA /DB_XREF=gi:5817165 /UG=Hs.323067 Homo sapiens mRNA; cDNA DKFZp434J194 (from clone DKFZp434J194)                                                                         |
| 207163_s_at | 2.04 | gb:NM_005163.1 /DEF=Homo sapiens v-akt murine thymoma viral oncogene homolog 1 (AKT1), mRNA. /FEA=mRNA /GEN=AKT1 /PROD=serine/threonine protein kinase /DB_XREF=gi:4885060 /UG=Hs.71816 v-akt murine thymoma viral oncogene homolog 1 /FL=gb:M63167.1 gb:NM_005163.1                     |
| 58696_at    | 2.03 | Cluster Incl. AL039469:DKFZp434P0110_s1 Homo sapiens cDNA, 3' end /clone=DKFZp434P0110 /clone_end=3 /gb=AL039469 /gi=5408517 /ug=Hs.97574 /len=888                                                                                                                                       |
| 210983_s_at | 2.03 | gb:AF279900.1 /DEF=Homo sapiens PNAS-146 mRNA, complete cds. /FEA=mRNA /PROD=PNAS-146 /DB_XREF=gi:12751125 /UG=Hs.77152 minichromosome maintenance deficient (S. cerevisiae) 7 /FL=gb:AF279900.1                                                                                         |
| 201490_s_at | 2.03 | gb:NM_005729.1 /DEF=Homo sapiens peptidylprolyl isomerase F (cyclophilin F) (PPIF), mRNA. /FEA=mRNA /GEN=PPIF /PROD=peptidylprolyl isomerase F (cyclophilin F) /DB_XREF=gi:5031986 /UG=Hs.173125 peptidylprolyl isomerase F (cyclophilin F) /FL=gb:BC005020.1 gb:M80254.1 gb:NM_005729.1 |
| 218069_at   | 2.03 | gb:NM_024096.1 /DEF=Homo sapiens hypothetical protein MGC5627 (MGC5627), mRNA. /FEA=mRNA /GEN=MGC5627 /PROD=hypothetical protein MGC5627 /DB_XREF=gi:13129099 /UG=Hs.237971 hypothetical protein MGC5627 /FL=gb:BC001344.1 gb:NM_024096.1 gb:AF212242.1                                  |
| 211065_x_at | 2.02 | gb:BC006422.1 /DEF=Homo sapiens, clone MGC:12724, mRNA, complete cds. /FEA=mRNA /PROD=Unknown (protein for MGC:12724) /DB_XREF=gi:13623608 /FL=gb:BC006422.1                                                                                                                             |
| 204949_at   | 2.02 | gb:NM_002162.2 /DEF=Homo sapiens intercellular adhesion molecule 3 (ICAM3), mRNA. /FEA=mRNA /GEN=ICAM3 /PROD=intercellular adhesion molecule 3 precursor /DB_XREF=gi:12545399 /UG=Hs.99995 intercellular adhesion molecule 3 /FL=gb:NM_002162.2                                          |
| 202094_at   | 2.02 | Consensus includes gb:AA648913 /FEA=EST /DB_XREF=gi:2575342 /DB_XREF=est:ns41a09.s1 /CLONE=IMAGE:1186168 /UG=Hs.1578 baculoviral IAP repeat-containing 5 (survivin) /FL=gb:NM_001168.1 gb:AF077350.1                                                                                     |
| 221676_s_at | 2.01 | gb:BC002342.1 /DEF=Homo sapiens, coronin, actin-binding protein, 1C, clone MGC:8518, mRNA, complete cds. /FEA=mRNA /PROD=coronin, actin-binding protein, 1C /DB_XREF=gi:12803080 /UG=Hs.17377 coronin, actin-binding protein, 1C /FL=gb:BC002342.1                                       |

|             |      |                                                                                                                                                                                                                                                                                                                                                          |
|-------------|------|----------------------------------------------------------------------------------------------------------------------------------------------------------------------------------------------------------------------------------------------------------------------------------------------------------------------------------------------------------|
| 209191_at   | 2.01 | gb:BC002654.1 /DEF=Homo sapiens, Similar to tubulin, beta, 4, clone MGC:4083, mRNA, complete cds. /FEA=mRNA /PROD=Similar to tubulin, beta, 4 /DB_XREF=gi:12803638 /UG=Hs.274398 Homo sapiens, Similar to tubulin, beta, 4, clone MGC:4083, mRNA, complete cds /FL=gb:BC002654.1                                                                         |
| 200661_at   | 2    | gb:NM_000308.1 /DEF=Homo sapiens protective protein for beta-galactosidase (galactosialidosis) (PPGB), mRNA. /FEA=mRNA /GEN=PPGB /PROD=protective protein for beta-galactosidase /DB_XREF=gi:4505988 /UG=Hs.118126 protective protein for beta-galactosidase (galactosialidosis) /FL=gb:BC000597.1 gb:M22960.1 gb:NM_000308.1                            |
| 211676_s_at | 2    | gb:AF056979.1 /DEF=Homo sapiens clone YAN1 interferon-gamma receptor mRNA, complete cds. /FEA=mRNA /PROD=interferon-gamma receptor /DB_XREF=gi:13562048 /FL=gb:AF056979.1                                                                                                                                                                                |
| 205199_at   | 2    | gb:NM_001216.1 /DEF=Homo sapiens carbonic anhydrase IX (CA9), mRNA. /FEA=mRNA /GEN=CA9 /PROD=carbonic anhydrase IX precursor /DB_XREF=gi:9955947 /UG=Hs.63287 carbonic anhydrase IX /FL=gb:NM_001216.1                                                                                                                                                   |
| 218153_at   | 2    | gb:NM_024537.1 /DEF=Homo sapiens hypothetical protein FLJ12118 (FLJ12118), mRNA. /FEA=mRNA /GEN=FLJ12118 /PROD=hypothetical protein FLJ12118 /DB_XREF=gi:13375694 /UG=Hs.7779 hypothetical protein FLJ12118 /FL=gb:NM_024537.1                                                                                                                           |
| 220272_at   | 2    | gb:NM_017637.1 /DEF=Homo sapiens hypothetical protein FLJ20043 (FLJ20043), mRNA. /FEA=mRNA /GEN=FLJ20043 /PROD=hypothetical protein FLJ20043 /DB_XREF=gi:8923050 /UG=Hs.103853 hypothetical protein FLJ20043 /FL=gb:NM_017637.1                                                                                                                          |
| 200788_s_at | 2    | gb:NM_003768.1 /DEF=Homo sapiens phosphoprotein enriched in astrocytes 15 (PEA15), mRNA. /FEA=mRNA /GEN=PEA15 /PROD=phosphoprotein enriched in astrocytes 15 /DB_XREF=gi:4505704 /UG=Hs.194673 phosphoprotein enriched in astrocytes 15 /FL=gb:BC002426.1 gb:NM_003768.1                                                                                 |
| 208611_s_at | 1.99 | gb:U83867.1 /DEF=Human alpha II spectrin mRNA, complete cds. /FEA=mRNA /PROD=alpha II spectrin /DB_XREF=gi:1805279 /UG=Hs.77196 spectrin, alpha, non-erythrocytic 1 (alpha-fodrin) /FL=gb:J05243.1 gb:U83867.1 gb:NM_003127.1                                                                                                                            |
| 201819_at   | 1.99 | gb:NM_005505.1 /DEF=Homo sapiens CD36 antigen (collagen type I receptor, thrombospondin receptor)-like 1 (CD36L1), mRNA. /FEA=mRNA /GEN=CD36L1 /PROD=CD36 antigen (collagen type I receptor,thrombospondin receptor)-like 1 /DB_XREF=gi:5031628 /UG=Hs.180616 CD36 antigen (collagen type I receptor, thrombospondin receptor)-like 1 /FL=gb:NM_005505.1 |
| 213951_s_at | 1.98 | Consensus includes gb:BE964655 /FEA=EST /DB_XREF=gi:11768198 /DB_XREF=est:601658585R1 /CLONE=IMAGE:3885812 /UG=Hs.78185 MAX-like bHLHZIP protein                                                                                                                                                                                                         |
| 222047_s_at | 1.97 | Consensus includes gb:A1523895 /FEA=EST /DB_XREF=gi:4438030 /DB_XREF=est:tg97g03.x1 /CLONE=IMAGE:2116756 /UG=Hs.111801 arsenate resistance protein ARS2                                                                                                                                                                                                  |
| 203454_s_at | 1.97 | gb:NM_004045.1 /DEF=Homo sapiens ATX1 (antioxidant protein 1, yeast) homolog 1 (ATOX1), mRNA. /FEA=mRNA /GEN=ATOX1 /PROD=ATX1 (antioxidant protein 1, yeast) homolog 1 /DB_XREF=gi:4757803 /UG=Hs.279910 ATX1 (antioxidant protein 1, yeast) homolog 1 /FL=gb:NM_004045.1                                                                                |
| 207002_s_at | 1.96 | gb:NM_002656.1 /DEF=Homo sapiens pleiomorphic adenoma gene-like 1 (PLAGL1), transcript variant 1, mRNA. /FEA=mRNA /GEN=PLAGL1 /PROD=pleiomorphic adenoma gene-like 1 isoform 1 /DB_XREF=gi:4505856 /UG=Hs.75825 pleiomorphic adenoma gene-like 1 /FL=gb:U81992.1 gb:NM_002656.1                                                                          |
| 200997_at   | 1.96 | gb:NM_002896.1 /DEF=Homo sapiens RNA binding motif protein 4 (RBM4), mRNA. /FEA=mRNA /GEN=RBM4 /PROD=RNA binding motif protein 4 /DB_XREF=gi:4506444 /UG=Hs.6106 RNA binding motif protein 4 /FL=gb:BC000307.1 gb:U89505.1 gb:NM_002896.1                                                                                                                |
| 217934_x_at | 1.96 | gb:NM_005861.1 /DEF=Homo sapiens STIP1 homology and U-Box containing protein 1 (STUB1), mRNA. /FEA=mRNA /GEN=STUB1 /PROD=serologically defined colon cancer antigen 7 /DB_XREF=gi:5031962                                                                                                                                                                |



|             |      |                                                                                                                                                                                                                                                                                                                                                                                                       |
|-------------|------|-------------------------------------------------------------------------------------------------------------------------------------------------------------------------------------------------------------------------------------------------------------------------------------------------------------------------------------------------------------------------------------------------------|
|             |      | /UG=Hs.25197 STIP1 homology and U-Box containing protein 1 /FL=gb:AF039689.1 gb:AF129085.1<br>gb:NM_005861.1                                                                                                                                                                                                                                                                                          |
| 219068_x_at | 1.96 | gb:NM_018188.1 /DEF=Homo sapiens hypothetical protein FLJ10709 (FLJ10709), mRNA. /FEA=mRNA<br>/GEN=FLJ10709 /PROD=hypothetical protein FLJ10709 /DB_XREF=gi:8922608 /UG=Hs.273357 hypothetical<br>protein FLJ10709 /FL=gb:NM_018188.1                                                                                                                                                                 |
| 206022_at   | 1.96 | gb:NM_000266.1 /DEF=Homo sapiens Norrie disease (pseudoglioma) (NDP), mRNA. /FEA=mRNA /GEN=NDP<br>/PROD=Norrie disease protein /DB_XREF=gi:4557788 /UG=Hs.2839 Norrie disease (pseudoglioma)<br>/FL=gb:NM_000266.1                                                                                                                                                                                    |
| 200621_at   | 1.96 | gb:NM_004078.1 /DEF=Homo sapiens cysteine and glycine-rich protein 1 (CSRP1), mRNA. /FEA=mRNA<br>/GEN=CSRP1 /PROD=cysteine and glycine-rich protein 1 /DB_XREF=gi:4758085 /UG=Hs.108080 cysteine and<br>glycine-rich protein 1 /FL=gb:M33146.1 gb:NM_004078.1                                                                                                                                         |
| 209172_s_at | 1.95 | gb:U30872.1 /DEF=Human mitosis mRNA, complete cds. /FEA=mRNA /PROD=mitosis /DB_XREF=gi:1000093<br>/UG=Hs.77204 centromere protein F (350400kD, mitosis) /FL=gb:U30872.1                                                                                                                                                                                                                               |
| 221704_s_at | 1.95 | gb:BC005882.1 /DEF=Homo sapiens, hypothetical protein FLJ12750, clone MGC:4691, mRNA, complete cds.<br>/FEA=mRNA /PROD=hypothetical protein FLJ12750 /DB_XREF=gi:13543447 /FL=gb:BC005882.1                                                                                                                                                                                                           |
| 208622_s_at | 1.94 | Consensus includes gb:AA670344 /FEA=EST /DB_XREF=gi:2631843 /DB_XREF=est:ad16b08.s1<br>/CLONE=IMAGE:878391 /UG=Hs.155191 villin 2 (ezrin) /FL=gb:J05021.1 gb:AL162086.1 gb:NM_003379.2                                                                                                                                                                                                                |
| 201895_at   | 1.94 | gb:NM_001654.1 /DEF=Homo sapiens v-raf murine sarcoma 3611 viral oncogene homolog 1 (ARAF1), mRNA.<br>/FEA=mRNA /GEN=ARAF1 /PROD=v-raf murine sarcoma 3611 viral oncogene homolog1 /DB_XREF=gi:4502192<br>/UG=Hs.77183 v-raf murine sarcoma 3611 viral oncogene homolog 1 /FL=gb:BC002466.1 gb:NM_001654.1                                                                                            |
| 207980_s_at | 1.94 | gb:NM_006079.1 /DEF=Homo sapiens Cbpp300-interacting transactivator, with GluAsp-rich carboxy-terminal<br>domain, 2 (CITED2), mRNA. /FEA=mRNA /GEN=CITED2 /PROD=Cbpp300-interacting transactivator, withGluAsp-<br>rich carboxy-terminal domain, 2 /DB_XREF=gi:5174416 /UG=Hs.82071 Cbpp300-interacting transactivator, with<br>GluAsp-rich carboxy-terminal domain, 2 /FL=gb:U65093.1 gb:NM_006079.1 |
| 203572_s_at | 1.94 | gb:NM_005641.1 /DEF=Homo sapiens TATA box binding protein (TBP)-associated factor, RNA polymerase II, E,<br>7085kD (TAF2E), mRNA. /FEA=mRNA /GEN=TAF2E /PROD=TATA box binding protein (TBP)-associatedfactor,<br>RNA polymerase II, E, 7085kD /DB_XREF=gi:5032146 /UG=Hs.78865 TATA box binding protein (TBP)-associated<br>factor, RNA polymerase II, E, 7085kD /FL=gb:NM_005641.1 gb:L25444.1       |
| 202725_at   | 1.94 | gb:NM_000937.1 /DEF=Homo sapiens polymerase (RNA) II (DNA directed) polypeptide A (220kD) (POLR2A),<br>mRNA. /FEA=mRNA /GEN=POLR2A /PROD=polymerase (RNA) II (DNA directed) polypeptide A(220kD)<br>/DB_XREF=gi:4505938 /UG=Hs.171880 polymerase (RNA) II (DNA directed) polypeptide A (220kD)<br>/FL=gb:NM_000937.1                                                                                  |
| 212722_s_at | 1.94 | Consensus includes gb:AK021780.1 /DEF=Homo sapiens cDNA FLJ11718 fis, clone HEMBA1005252, highly<br>similar to Homo sapiens mRNA for KIAA0585 protein. /FEA=mRNA /DB_XREF=gi:10433034 /UG=Hs.72660<br>phosphatidylserine receptor                                                                                                                                                                     |
| 201999_s_at | 1.93 | gb:NM_006519.1 /DEF=Homo sapiens t-complex-associated-testis-expressed 1-like 1 (TCTEL1), mRNA.<br>/FEA=mRNA /GEN=TCTEL1 /PROD=t-complex-associated-testis-expressed 1-like 1 /DB_XREF=gi:5730084<br>/UG=Hs.266940 t-complex-associated-testis-expressed 1-like 1 /FL=gb:U56255.1 gb:D50663.1 gb:NM_006519.1                                                                                          |
| 200884_at   | 1.93 | gb:NM_001823.1 /DEF=Homo sapiens creatine kinase, brain (CKB), mRNA. /FEA=mRNA /GEN=CKB<br>/PROD=creatine kinase, brain /DB_XREF=gi:4502850 /UG=Hs.173724 creatine kinase, brain /FL=gb:L47647.1<br>gb:BC001190.1 gb:BC004914.1 gb:M16364.1 gb:M16451.1 gb:NM_001823.1                                                                                                                                |
| 202292_x_at | 1.93 | gb:NM_007260.1 /DEF=Homo sapiens lysophospholipase II (LYPLA2), mRNA. /FEA=mRNA /GEN=LYPLA2<br>/PROD=lysophospholipase II /DB_XREF=gi:9966763 /UG=Hs.283655 lysophospholipase II /FL=gb:AF098668.1                                                                                                                                                                                                    |

|             |      |                                                                                                                                                                                                                                                                                                                           |
|-------------|------|---------------------------------------------------------------------------------------------------------------------------------------------------------------------------------------------------------------------------------------------------------------------------------------------------------------------------|
| 209774_x_at | 1.93 | gb:NM_007260.1<br>gb:M57731.1 /DEF=Human gro-beta mRNA, complete cds. /FEA=mRNA /GEN=gro-beta /PROD=cytokine gro-beta /DB_XREF=gi:183626 /UG=Hs.75765 GRO2 oncogene /FL=gb:M57731.1 gb:M36820.1 gb:NM_002089.1                                                                                                            |
| 202819_s_at | 1.92 | gb:NM_003198.1 /DEF=Homo sapiens transcription elongation factor B (SIII), polypeptide 3 (110kD, elongin A) (TCEB3), mRNA. /FEA=mRNA /GEN=TCEB3 /PROD=elongin A /DB_XREF=gi:4507388 /UG=Hs.155202 transcription elongation factor B (SIII), polypeptide 3 (110kD, elongin A) /FL=gb:BC002883.1 gb:NM_003198.1 gb:L47345.1 |
| 205345_at   | 1.91 | gb:NM_000465.1 /DEF=Homo sapiens BRCA1 associated RING domain 1 (BARD1), mRNA. /FEA=mRNA /GEN=BARD1 /PROD=BRCA1 associated RING domain 1 /DB_XREF=gi:4557348 /UG=Hs.54089 BRCA1 associated RING domain 1 /FL=gb:U76638.1 gb:NM_000465.1                                                                                   |
| 207876_s_at | 1.91 | gb:NM_001458.1 /DEF=Homo sapiens filamin C, gamma (actin-binding protein-280) (FLNC), mRNA. /FEA=mRNA /GEN=FLNC /PROD=gamma filamin /DB_XREF=gi:4557596 /UG=Hs.58414 filamin C, gamma (actin-binding protein-280) /FL=gb:AF089841.1 gb:NM_001458.1                                                                        |
| 202945_at   | 1.9  | gb:NM_004957.1 /DEF=Homo sapiens folylpolyglutamate synthase (FPGS), mRNA. /FEA=mRNA /GEN=FPGS /PROD=folylpolyglutamate synthase /DB_XREF=gi:4826727 /UG=Hs.754 folylpolyglutamate synthase /FL=gb:M98045.1 gb:NM_004957.1                                                                                                |
| 205352_at   | 1.9  | gb:NM_005025.1 /DEF=Homo sapiens protease inhibitor 12 (neuroserpin) (SERPINI1), mRNA. /FEA=mRNA /GEN=SERPINI1 /PROD=protease inhibitor 12 (neuroserpin) /DB_XREF=gi:4826903 /UG=Hs.78589 serine (or cysteine) proteinase inhibitor, clade I (neuroserpin), member 1 /FL=gb:NM_005025.1                                   |
| 221591_s_at | 1.9  | gb:BC005004.1 /DEF=Homo sapiens, hypothetical protein FLJ10491, clone MGC:961, mRNA, complete cds. /FEA=mRNA /PROD=hypothetical protein FLJ10491 /DB_XREF=gi:13436475 /UG=Hs.86211 hypothetical protein /FL=gb:BC005004.1                                                                                                 |
| 212788_x_at | 1.9  | Consensus includes gb:BG537190 /FEA=EST /DB_XREF=gi:13528922 /DB_XREF=est:602565589F1 /CLONE=IMAGE:4690079 /UG=Hs.111334 ferritin, light polypeptide                                                                                                                                                                      |
| 210933_s_at | 1.89 | gb:BC004908.1 /DEF=Homo sapiens, clone MGC:4655, mRNA, complete cds. /FEA=mRNA /PROD=Unknown (protein for MGC:4655) /DB_XREF=gi:13436196 /UG=Hs.326737 Homo sapiens, clone MGC:4655, mRNA, complete cds /FL=gb:BC004908.1                                                                                                 |
| 217907_at   | 1.88 | gb:NM_014161.1 /DEF=Homo sapiens HSPC071 protein (HSPC071), mRNA. /FEA=mRNA /GEN=HSPC071 /PROD=HSPC071 protein /DB_XREF=gi:7661777 /UG=Hs.23038 HSPC071 protein /FL=gb:AL136633.1 gb:BC001623.1 gb:AF161556.1 gb:NM_014161.1                                                                                              |
| 211126_s_at | 1.88 | gb:U46006.1 /DEF=Homo sapiens smooth muscle LIM protein (h-SmLIM) mRNA, complete cds. /FEA=mRNA /GEN=h-SmLIM /PROD=smooth muscle LIM protein /DB_XREF=gi:1314358 /UG=Hs.10526 cysteine and glycine-rich protein 2 /FL=gb:U46006.1                                                                                         |
| 220757_s_at | 1.88 | gb:NM_025241.1 /DEF=Homo sapiens UBX domain-containing gene 1 (UBXD1), mRNA. /FEA=mRNA /GEN=UBXD1 /PROD=UBX domain-containing gene 1 /DB_XREF=gi:13376853 /UG=Hs.11081 UBX domain-containing 2 /FL=gb:AF272893.1 gb:NM_025241.1                                                                                           |
| 209478_at   | 1.88 | gb:U95006.1 /DEF=Human D9 splice variant A mRNA, complete cds. /FEA=mRNA /PROD=D9 splice variant A /DB_XREF=gi:2071992 /UG=Hs.37616 Human D9 splice variant B mRNA, complete cds /FL=gb:U95006.1 gb:U95007.1                                                                                                              |
| 202275_at   | 1.87 | gb:NM_000402.1 /DEF=Homo sapiens glucose-6-phosphate dehydrogenase (G6PD), nuclear gene encoding mitochondrial protein, mRNA. /FEA=mRNA /GEN=G6PD /PROD=glucose-6-phosphate dehydrogenase /DB_XREF=gi:4503844 /UG=Hs.80206 glucose-6-phosphate dehydrogenase /FL=gb:BC000337.1 gb:M21248.1 gb:NM_000402.1                 |

|             |      |                                                                                                                                                                                                                                                                                                                  |
|-------------|------|------------------------------------------------------------------------------------------------------------------------------------------------------------------------------------------------------------------------------------------------------------------------------------------------------------------|
| 203085_s_at | 1.85 | gb:BC000125.1 /DEF=Homo sapiens, Similar to transforming growth factor, beta 1, clone MGC:3119, mRNA, complete cds. /FEA=mRNA /PROD=Similar to transforming growth factor, beta 1 /DB_XREF=gi:12652748 /UG=Hs.1103 transforming growth factor, beta 1 /FL=gb:NM_000660.1 gb:BC000125.1 gb:BC001180.1 gb:M38449.1 |
| 215566_x_at | 1.85 | Consensus includes gb:AK024724.1 /DEF=Homo sapiens cDNA: FLJ21071 fis, clone CAS01789, highly similar to AF098668 Homo sapiens acyl-protein thioesterase mRNA. /FEA=mRNA /DB_XREF=gi:10437080 /UG=Hs.283655 lysophospholipase II                                                                                 |
| 202207_at   | 1.85 | Consensus includes gb:BG435404 /FEA=EST /DB_XREF=gi:13341910 /DB_XREF=est:602507678F1 /CLONE=IMAGE:4605066 /UG=Hs.111554 ADP-ribosylation factor-like 7 /FL=gb:BC001051.1 gb:AB016811.1 gb:NM_005737.2                                                                                                           |
| 201976_s_at | 1.84 | gb:NM_012334.1 /DEF=Homo sapiens myosin X (MYO10), mRNA. /FEA=mRNA /GEN=MYO10 /PROD=myosin X /DB_XREF=gi:11037056 /UG=Hs.61638 myosin X /FL=gb:NM_012334.1 gb:AF234532.1 gb:AF247457.2                                                                                                                           |
| 211814_s_at | 1.82 | gb:AF112857.1 /DEF=Homo sapiens cyclin E2 splice variant 1 mRNA, complete cds. /FEA=CDS /PROD=cyclin E2 splice variant 1 /DB_XREF=gi:4092787 /UG=Hs.30464 cyclin E2 /FL=gb:AF112857.1                                                                                                                            |
| 206593_s_at | 1.79 | gb:NM_006752.1 /DEF=Homo sapiens surfeit 5 (SURF5), mRNA. /FEA=mRNA /GEN=SURF5 /PROD=surfeit 5 /DB_XREF=gi:5803182 /UG=Hs.78354 surfeit 5 /FL=gb:NM_006752.1                                                                                                                                                     |
| 221436_s_at | 1.78 | gb:NM_031299.1 /DEF=Homo sapiens hypothetical protein MGC2577 (MGC2577), mRNA. /FEA=CDS /GEN=MGC2577 /PROD=hypothetical protein MGC2577 /DB_XREF=gi:13876383 /FL=gb:NM_031299.1                                                                                                                                  |
| 201645_at   | 1.78 | gb:NM_002160.1 /DEF=Homo sapiens hexabrachion (tenascin C, cytotactin) (HXB), mRNA. /FEA=mRNA /GEN=HXB /PROD=hexabrachion (tenascin C, cytotactin) /DB_XREF=gi:4504548 /UG=Hs.289114 hexabrachion (tenascin C, cytotactin) /FL=gb:M55618.1 gb:NM_002160.1                                                        |
| 209053_s_at | 1.78 | Consensus includes gb:BE793789 /FEA=EST /DB_XREF=gi:10214987 /DB_XREF=est:601589946F1 /CLONE=IMAGE:3944195 /UG=Hs.110457 Wolf-Hirschhorn syndrome candidate 1 /FL=gb:AF083389.1                                                                                                                                  |
| 204214_s_at | 1.78 | gb:NM_006834.1 /DEF=Homo sapiens RAB32, member RAS oncogene family (RAB32), mRNA. /FEA=mRNA /GEN=RAB32 /PROD=RAB32, member RAS oncogene family /DB_XREF=gi:5803132 /UG=Hs.32217 RAB32, member RAS oncogene family /FL=gb:U71127.1 gb:NM_006834.1                                                                 |
| 215047_at   | 1.77 | Consensus includes gb:AL080170.1 /DEF=Homo sapiens mRNA; cDNA DKFZp434C091 (from clone DKFZp434C091); partial cds. /FEA=mRNA /GEN=DKFZp434C091 /PROD=hypothetical protein /DB_XREF=gi:5262639 /UG=Hs.51692 DKFZP434C091 protein                                                                                  |
| 211535_s_at | 1.77 | gb:M60485.1 /DEF=Human fibroblast growth factor receptor mRNA, complete cds. /FEA=mRNA /PROD=fibroblast growth factor receptor /DB_XREF=gi:182560 /UG=Hs.748 fibroblast growth factor receptor 1 (fms-related tyrosine kinase 2, Pfeiffer syndrome) /FL=gb:M60485.1                                              |
| 213668_s_at | 1.77 | Consensus includes gb:AI989477 /FEA=EST /DB_XREF=gi:5836358 /DB_XREF=est:ws25b11.x1 /CLONE=IMAGE:2498205 /UG=Hs.83484 SRY (sex determining region Y)-box 4                                                                                                                                                       |
| 202407_s_at | 1.77 | Consensus includes gb:BF342707 /FEA=EST /DB_XREF=gi:11289729 /DB_XREF=est:602013660F1 /CLONE=IMAGE:4149542 /UG=Hs.183438 DKFZP566J153 protein /FL=gb:AL050369.1 gb:NM_015629.1                                                                                                                                   |
| 213646_x_at | 1.77 | Consensus includes gb:BE300252 /FEA=EST /DB_XREF=gi:9184000 /DB_XREF=est:600944004T1 /CLONE=IMAGE:2960280 /UG=Hs.240615 hypothetical protein FLJ13556 similar to N-myc downstream regulated 3                                                                                                                    |
| 213147_at   | 1.77 | Consensus includes gb:AI375919 /FEA=EST /DB_XREF=gi:4175909 /DB_XREF=est:tc14d04.x1 /CLONE=IMAGE:2063815 /UG=Hs.110637 homeo box A10 /FL=gb:NM_018951.1                                                                                                                                                          |
| 222043_at   | 1.75 | Consensus includes gb:AI982754 /FEA=EST /DB_XREF=gi:5809973 /DB_XREF=est:wz28g10.x1 /CLONE=IMAGE:2559426 /UG=Hs.75106 clusterin (complement lysis inhibitor, SP-40,40, sulfated glycoprotein 2,                                                                                                                  |

|             |       |                                                                                                                                                                                                                                                                                                                    |
|-------------|-------|--------------------------------------------------------------------------------------------------------------------------------------------------------------------------------------------------------------------------------------------------------------------------------------------------------------------|
| 215537_x_at | 1.74  | testosterone-repressed prostate message 2, apolipoprotein J)<br>Consensus includes gb:AJ012008 /DEF=Homo sapiens genes encoding RNCC protein, DDAH protein, Ly6-C protein, Ly6-D protein and immunoglobulin receptor /FEA=mRNA_4 /DB_XREF=gi:5304874 /UG=Hs.247362 dimethylarginine dimethylaminohydrolase 2       |
| 203175_at   | 1.74  | gb:NM_001665.1 /DEF=Homo sapiens ras homolog gene family, member G (rho G) (ARHG), mRNA. /FEA=mRNA /GEN=ARHG /PROD=ras homolog gene family, member G (rho G) /DB_XREF=gi:4502218 /UG=Hs.75082 ras homolog gene family, member G (rho G) /FL=gb:NM_001665.1                                                         |
| 200959_at   | 1.74  | gb:NM_004960.1 /DEF=Homo sapiens fusion, derived from t(12;16) malignant liposarcoma (FUS), mRNA. /FEA=mRNA /GEN=FUS /PROD=fusion, derived from t(12;16) malignant liposarcoma /DB_XREF=gi:4826733 /UG=Hs.99969 fusion, derived from t(12;16) malignant liposarcoma /FL=gb:BC000402.1 gb:BC002459.1 gb:NM_004960.1 |
| 216228_s_at | 1.72  | Consensus includes gb:AK001538.1 /DEF=Homo sapiens cDNA FLJ10676 fis, clone NT2RP2006464, highly similar to Homo sapiens mRNA for AND-1 protein. /FEA=mRNA /DB_XREF=gi:7022855 /UG=Hs.72160 AND-1 protein                                                                                                          |
| 204998_s_at | 1.72  | gb:NM_012068.2 /DEF=Homo sapiens activating transcription factor 5 (ATF5), mRNA. /FEA=mRNA /GEN=ATF5 /PROD=activating transcription factor 5 /DB_XREF=gi:12597624 /UG=Hs.9754 activating transcription factor 5 /FL=gb:AF305687.1 gb:AB021663.2 gb:NM_012068.2 gb:BC005174.1                                       |
| 201949_x_at | 1.71  | Consensus includes gb:AL572341 /FEA=EST /DB_XREF=gi:12930514 /DB_XREF=est:AL572341 /CLONE=CS0DI007YC13 (3 prime) /UG=Hs.76368 capping protein (actin filament) muscle Z-line, beta /FL=gb:NM_004930.1 gb:U03271.1                                                                                                  |
| 218105_s_at | 1.65  | gb:NM_015956.1 /DEF=Homo sapiens CGI-28 protein (LOC51073), mRNA. /FEA=mRNA /GEN=LOC51073 /PROD=CGI-28 protein /DB_XREF=gi:7705721 /UG=Hs.279652 CGI-28 protein /FL=gb:AF132962.1 gb:NM_015956.1                                                                                                                   |
| 212203_x_at | 1.59  | Consensus includes gb:BF338947 /FEA=EST /DB_XREF=gi:11285367 /DB_XREF=est:602036012F1 /CLONE=IMAGE:4184090 /UG=Hs.182241 interferon induced transmembrane protein 3 (1-8U)                                                                                                                                         |
| 201427_s_at | 1.56  | gb:NM_005410.1 /DEF=Homo sapiens selenoprotein P, plasma, 1 (SEPP1), mRNA. /FEA=mRNA /GEN=SEPP1 /PROD=selenoprotein P precursor /DB_XREF=gi:4885590 /UG=Hs.3314 selenoprotein P, plasma, 1 /FL=gb:NM_005410.1                                                                                                      |
| 217729_s_at | 1.49  | gb:NM_001130.3 /DEF=Homo sapiens amino-terminal enhancer of split (AES), mRNA. /FEA=mRNA /GEN=AES /PROD=amino-terminal enhancer of split /DB_XREF=gi:6382065 /UG=Hs.244 amino-terminal enhancer of split /FL=gb:AF072902.1 gb:U04241.1 gb:NM_001130.3                                                              |
| 212518_at   | 1.4   | Consensus includes gb:AB011161.1 /DEF=Homo sapiens mRNA for KIAA0589 protein, partial cds. /FEA=mRNA /GEN=KIAA0589 /PROD=KIAA0589 protein /DB_XREF=gi:3043701 /UG=Hs.275182 phosphatidylinositol-4-phosphate 5-kinase, type I, gamma                                                                               |
| 206482_at   | -1.4  | gb:NM_005975.1 /DEF=Homo sapiens PTK6 protein tyrosine kinase 6 (PTK6), mRNA. /FEA=mRNA /GEN=PTK6 /PROD=PTK6 protein tyrosine kinase 6 /DB_XREF=gi:5174646 /UG=Hs.51133 PTK6 protein tyrosine kinase 6 /FL=gb:NM_005975.1                                                                                          |
| 211959_at   | -1.44 | Consensus includes gb:AW007532 /FEA=EST /DB_XREF=gi:5856310 /DB_XREF=est:ws52h07.x1 /CLONE=IMAGE:2500861 /UG=Hs.103391 Human insulin-like growth factor binding protein 5 (IGFBP5) mRNA                                                                                                                            |
| 204276_at   | -1.47 | Consensus includes gb:BE895437 /FEA=EST /DB_XREF=gi:10358829 /DB_XREF=est:601437912F1 /CLONE=IMAGE:3922971 /UG=Hs.274701 thymidine kinase 2, mitochondrial /FL=gb:NM_004614.1 gb:U77088.1                                                                                                                          |
| 209538_at   | -1.5  | gb:U69645.1 /DEF=Human zinc finger protein mRNA, complete cds. /FEA=mRNA /PROD=zinc finger protein /DB_XREF=gi:1575614 /UG=Hs.78765 zinc finger protein 32 (KOX 30) /FL=gb:U69645.1                                                                                                                                |

|             |       |                                                                                                                                                                                                                                                                                                                                                   |
|-------------|-------|---------------------------------------------------------------------------------------------------------------------------------------------------------------------------------------------------------------------------------------------------------------------------------------------------------------------------------------------------|
| 201831_s_at | -1.55 | Consensus includes gb:BE875592 /FEA=EST /DB_XREF=gi:10324368 /DB_XREF=est:601487031F1 /CLONE=IMAGE:3889710 /UG=Hs.325948 vesicle docking protein p115 /FL=gb:D86326.1 gb:NM_003715.1                                                                                                                                                              |
| 218769_s_at | -1.57 | gb:NM_023039.1 /DEF=Homo sapiens ankyrin repeat, family A (RFXANK-like), 2 (ANKRA2), mRNA. /FEA=mRNA /GEN=ANKRA2 /PROD=ankyrin repeat, family A (RFXANK-like), 2 /DB_XREF=gi:12746411 /UG=Hs.239154 ankyrin repeat, family A (RFXANK-like), 2 /FL=gb:AF314032.1 gb:NM_023039.1                                                                    |
| 206668_s_at | -1.61 | gb:NM_004866.1 /DEF=Homo sapiens secretory carrier membrane protein 1 (SCAMP1), mRNA. /FEA=mRNA /GEN=SCAMP1 /PROD=secretory carrier membrane protein 1 /DB_XREF=gi:4759063 /UG=Hs.31218 secretory carrier membrane protein 1 /FL=gb:AF005037.1 gb:AF038966.1 gb:NM_004866.1                                                                       |
| 218383_at   | -1.62 | gb:NM_017815.1 /DEF=Homo sapiens hypothetical protein FLJ20424 (FLJ20424), mRNA. /FEA=mRNA /GEN=FLJ20424 /PROD=hypothetical protein FLJ20424 /DB_XREF=gi:8923395 /UG=Hs.8886 hypothetical protein FLJ20424 /FL=gb:BC002554.1 gb:BC001916.1 gb:NM_017815.1                                                                                         |
| 203711_s_at | -1.66 | gb:NM_014362.1 /DEF=Homo sapiens 3-hydroxyisobutyryl-Coenzyme A hydrolase (HIBCH), mRNA. /FEA=mRNA /GEN=HIBCH /PROD=3-hydroxyisobutyryl-Coenzyme A hydrolase /DB_XREF=gi:7657159 /UG=Hs.236642 3-hydroxyisobutyryl-Coenzyme A hydrolase /FL=gb:BC005190.1 gb:U66669.1 gb:NM_014362.1                                                              |
| 218764_at   | -1.68 | gb:NM_024064.1 /DEF=Homo sapiens hypothetical protein MGC5363 (MGC5363), mRNA. /FEA=mRNA /GEN=MGC5363 /PROD=hypothetical protein MGC5363 /DB_XREF=gi:13129041 /UG=Hs.1880 hypothetical protein MGC5363 /FL=gb:BC001000.2 gb:NM_024064.1                                                                                                           |
| 213605_s_at | -1.7  | Consensus includes gb:AL049987.1 /DEF=Homo sapiens mRNA; cDNA DKFZp564F112 (from clone DKFZp564F112). /FEA=mRNA /DB_XREF=gi:4884238 /UG=Hs.166361 Homo sapiens mRNA; cDNA DKFZp564F112 (from clone DKFZp564F112)                                                                                                                                  |
| 211812_s_at | -1.73 | gb:AB050856.1 /DEF=Homo sapiens beta3GalNAcT-1 mRNA for globoside synthase, complete cds, clone: type 2. /FEA=CDS /GEN=beta3GalNAcT-1 /PROD=globoside synthase /DB_XREF=gi:11136456 /UG=Hs.267695 UDP-Gal:betaGlcNAc beta 1,3-galactosyltransferase, polypeptide 3 /FL=gb:AB050856.1                                                              |
| 215221_at   | -1.74 | Consensus includes gb:AK025064.1 /DEF=Homo sapiens cDNA: FLJ21411 fis, clone COL03986. /FEA=mRNA /DB_XREF=gi:10437503 /UG=Hs.306758 Homo sapiens cDNA: FLJ21411 fis, clone COL03986                                                                                                                                                               |
| 205709_s_at | -1.77 | gb:NM_001263.1 /DEF=Homo sapiens CDP-diacylglycerol synthase (phosphatidate cytidylyltransferase) 1 (CDS1), mRNA. /FEA=mRNA /GEN=CDS1 /PROD=CDP-diacylglycerol synthase (phosphatidatecytidylyltransferase) 1 /DB_XREF=gi:4502756 /UG=Hs.152981 CDP-diacylglycerol synthase (phosphatidate cytidylyltransferase) 1 /FL=gb:U65887.1 gb:NM_001263.1 |
| 203166_at   | -1.81 | gb:NM_006324.1 /DEF=Homo sapiens craniofacial development protein 1 (CFDP1), mRNA. /FEA=mRNA /GEN=CFDP1 /PROD=craniofacial development protein 1 /DB_XREF=gi:5453566 /UG=Hs.296460 craniofacial development protein 1 /FL=gb:BC000991.2 gb:AB009285.1 gb:NM_006324.1                                                                              |
| 213073_at   | -1.82 | Consensus includes gb:AB002319.1 /DEF=Human mRNA for KIAA0321 gene, partial cds. /FEA=mRNA /GEN=KIAA0321 /DB_XREF=gi:2224582 /UG=Hs.8663 KIAA0321 protein                                                                                                                                                                                         |
| 35148_at    | -1.82 | Cluster Incl. AC005954:Homo sapiens chromosome 19, cosmid R28784 /cds=(0,2858) /gb=AC005954 /gi=3851201 /ug=Hs.25527 /len=2859                                                                                                                                                                                                                    |
| 212274_at   | -1.82 | Consensus includes gb:AV705559 /FEA=EST /DB_XREF=gi:10722858 /DB_XREF=est:AV705559 /CLONE=ADBAPE04 /UG=Hs.81412 lipin 1                                                                                                                                                                                                                           |
| 213049_at   | -1.83 | Consensus includes gb:BG436400 /FEA=EST /DB_XREF=gi:13342906 /DB_XREF=est:602509062F1 /CLONE=IMAGE:4619679 /UG=Hs.167031 DKFZP566D133 protein                                                                                                                                                                                                     |
| 204203_at   | -1.83 | gb:NM_001806.1 /DEF=Homo sapiens CCAATenhancer binding protein (CEBP), gamma (CEBPG), mRNA. /FEA=mRNA /GEN=CEBPG /PROD=CCAATenhancer binding protein gamma /DB_XREF=gi:4502768 /UG=Hs.2227 CCAATenhancer binding protein (CEBP), gamma /FL=gb:NM_001806.1 gb:U20240.1                                                                             |

|             |       |                                                                                                                                                                                                                                                                                                                                                                         |
|-------------|-------|-------------------------------------------------------------------------------------------------------------------------------------------------------------------------------------------------------------------------------------------------------------------------------------------------------------------------------------------------------------------------|
| 39549_at    | -1.84 | Cluster Incl. AI743090:wg87a11.x1 Homo sapiens cDNA, 3' end /clone=IMAGE-2372060 /clone_end=3 /gb=AI743090 /gi=5111378 /ug=Hs.106705 /len=547                                                                                                                                                                                                                           |
| 212686_at   | -1.84 | Consensus includes gb:AB032983.1 /DEF=Homo sapiens mRNA for KIAA1157 protein, partial cds. /FEA=mRNA /GEN=KIAA1157 /PROD=KIAA1157 protein /DB_XREF=gi:6330128 /UG=Hs.21894 KIAA1157 protein                                                                                                                                                                             |
| 214077_x_at | -1.84 | Consensus includes gb:H15129 /FEA=EST /DB_XREF=gi:879949 /DB_XREF=est:ym30b02.s1 /CLONE=IMAGE:49680 /UG=Hs.117313 Meis (mouse) homolog 3                                                                                                                                                                                                                                |
| 200854_at   | -1.85 | Consensus includes gb:AB028970.1 /DEF=Homo sapiens mRNA for KIAA1047 protein, partial cds. /FEA=mRNA /GEN=KIAA1047 /PROD=KIAA1047 protein /DB_XREF=gi:5689430 /UG=Hs.144904 nuclear receptor co-repressor 1 /FL=gb:AF044209.1 gb:NM_006311.1                                                                                                                            |
| 206075_s_at | -1.85 | gb:NM_001895.1 /DEF=Homo sapiens casein kinase 2, alpha 1 polypeptide (CSNK2A1), mRNA. /FEA=mRNA /GEN=CSNK2A1 /PROD=casein kinase 2, alpha 1 polypeptide /DB_XREF=gi:4503094 /UG=Hs.155140 casein kinase 2, alpha 1 polypeptide /FL=gb:M55265.1 gb:NM_001895.1 gb:J02853.1                                                                                              |
| 215296_at   | -1.85 | Consensus includes gb:AK027000.1 /DEF=Homo sapiens cDNA: FLJ23347 fis, clone HEP13727. /FEA=mRNA /DB_XREF=gi:10440000 /UG=Hs.18586 KIAA0451 gene product                                                                                                                                                                                                                |
| 201860_s_at | -1.86 | gb:NM_000930.1 /DEF=Homo sapiens plasminogen activator, tissue (PLAT), mRNA. /FEA=mRNA /GEN=PLAT /PROD=plasminogen activator, tissue /DB_XREF=gi:4505860 /UG=Hs.274404 plasminogen activator, tissue /FL=gb:NM_000931.1 gb:M15518.1 gb:M18182.1 gb:NM_000930.1                                                                                                          |
| 213056_at   | -1.86 | Consensus includes gb:AU145019 /FEA=EST /DB_XREF=gi:11006540 /DB_XREF=est:AU145019 /CLONE=HEMBA1003646 /UG=Hs.96427 KIAA1013 protein                                                                                                                                                                                                                                    |
| 219166_at   | -1.87 | gb:NM_018139.1 /DEF=Homo sapiens hypothetical protein FLJ10563 (FLJ10563), mRNA. /FEA=mRNA /GEN=FLJ10563 /PROD=hypothetical protein FLJ10563 /DB_XREF=gi:8922518 /UG=Hs.265960 hypothetical protein FLJ10563 /FL=gb:NM_018139.1                                                                                                                                         |
| 220559_at   | -1.87 | gb:NM_001426.2 /DEF=Homo sapiens engrailed homolog 1 (EN1), mRNA. /FEA=mRNA /GEN=EN1 /PROD=engrailed homolog 1 /DB_XREF=gi:7710118 /UG=Hs.271977 engrailed homolog 1 /FL=gb:NM_001426.2                                                                                                                                                                                 |
| 208070_s_at | -1.87 | gb:NM_002912.1 /DEF=Homo sapiens REV3 (yeast homolog)-like, catalytic subunit of DNA polymerase zeta (REV3L), mRNA. /FEA=mRNA /GEN=REV3L /PROD=REV3 (yeast homolog)-like, catalytic subunit of DNA polymerase zeta /DB_XREF=gi:4506482 /UG=Hs.115521 REV3 (yeast homolog)-like, catalytic subunit of DNA polymerase zeta /FL=gb:AF078695.1 gb:NM_002912.1 gb:AF179428.1 |
| 213992_at   | -1.87 | Consensus includes gb:AI889941 /FEA=EST /DB_XREF=gi:5595105 /DB_XREF=est:wm65d06.x1 /CLONE=IMAGE:2440811 /UG=Hs.408 collagen, type IV, alpha 6                                                                                                                                                                                                                          |
| 214734_at   | -1.88 | Consensus includes gb:AB014524.1 /DEF=Homo sapiens mRNA for KIAA0624 protein, partial cds. /FEA=mRNA /GEN=KIAA0624 /PROD=KIAA0624 protein /DB_XREF=gi:3327061 /UG=Hs.138380 KIAA0624 protein                                                                                                                                                                            |
| 218649_x_at | -1.88 | gb:NM_004713.1 /DEF=Homo sapiens serologically defined colon cancer antigen 1 (SDCCAG1), mRNA. /FEA=mRNA /GEN=SDCCAG1 /PROD=serologically defined colon cancer antigen 1 /DB_XREF=gi:4759077 /UG=Hs.54900 serologically defined colon cancer antigen 1 /FL=gb:AF039687.1 gb:NM_004713.1                                                                                 |
| 211574_s_at | -1.88 | gb:D84105.1 /DEF=Human CD46 mRNA, complete cds. /FEA=mRNA /PROD=CD46 /DB_XREF=gi:1256700 /UG=Hs.83532 membrane cofactor protein (CD46, trophoblast-lymphocyte cross-reactive antigen) /FL=gb:D84105.1                                                                                                                                                                   |
| 218142_s_at | -1.88 | gb:NM_016302.1 /DEF=Homo sapiens protein x 0001 (LOC51185), mRNA. /FEA=mRNA /GEN=LOC51185 /PROD=protein x 0001 /DB_XREF=gi:10047097 /UG=Hs.18925 protein x 0001 /FL=gb:NM_016302.1 gb:AF117230.1                                                                                                                                                                        |
| 219822_at   | -1.88 | gb:NM_004294.1 /DEF=Homo sapiens mitochondrial translational release factor 1 (MTRF1), mRNA. /FEA=mRNA /GEN=MTRF1 /PROD=mitochondrial translational release factor 1 /DB_XREF=gi:4758743 /UG=Hs.80683                                                                                                                                                                   |

|             |       |                                                                                                                                                                                                                                                                                                                                                                     |
|-------------|-------|---------------------------------------------------------------------------------------------------------------------------------------------------------------------------------------------------------------------------------------------------------------------------------------------------------------------------------------------------------------------|
| 206654_s_at | -1.88 | mitochondrial translational release factor 1 /FL=gb:AF072934.1 gb:NM_004294.1<br>gb:NM_006467.1 /DEF=Homo sapiens polymerase (RNA) III (DNA directed) (32kD) (RPC32), mRNA.<br>/FEA=mRNA /GEN=RPC32 /PROD=polymerase (RNA) III (DNA directed) (32kD) /DB_XREF=gi:5454017<br>/UG=Hs.282387 polymerase (RNA) III (DNA directed) (32kD) /FL=gb:U93868.1 gb:NM_006467.1 |
| 218940_at   | -1.89 | gb:NM_024558.1 /DEF=Homo sapiens hypothetical protein FLJ13920 (FLJ13920), mRNA. /FEA=mRNA<br>/GEN=FLJ13920 /PROD=hypothetical protein FLJ13920 /DB_XREF=gi:13375724 /UG=Hs.13056 hypothetical<br>protein FLJ13920 /FL=gb:NM_024558.1                                                                                                                               |
| 202731_at   | -1.9  | gb:NM_014456.1 /DEF=Homo sapiens programmed cell death 4 (PDCD4), mRNA. /FEA=mRNA /GEN=PDCD4<br>/PROD=programmed cell death 4 /DB_XREF=gi:7657448 /UG=Hs.296251 programmed cell death 4<br>/FL=gb:U96628.1 gb:NM_014456.1                                                                                                                                           |
| 203786_s_at | -1.9  | gb:NM_003287.1 /DEF=Homo sapiens tumor protein D52-like 1 (TPD52L1), mRNA. /FEA=mRNA /GEN=TPD52L1<br>/PROD=tumor protein D52-like 1 /DB_XREF=gi:4507640 /UG=Hs.16611 tumor protein D52-like 1 /FL=gb:U44427.1<br>gb:NM_003287.1                                                                                                                                     |
| 205540_s_at | -1.93 | gb:NM_016656.1 /DEF=Homo sapiens GTP-binding protein ragB (RAGB), transcript variant RAGBI, mRNA.<br>/FEA=mRNA /GEN=RAGB /PROD=GTP-binding protein ragB long isoform /DB_XREF=gi:8051626 /UG=Hs.50282<br>GTP-binding protein ragB /FL=gb:NM_016656.1                                                                                                                |
| 208693_s_at | -1.94 | gb:D30658.1 /DEF=Human T-cell mRNA for glycyl tRNA synthetase, complete cds. /FEA=mRNA /PROD=glycyl<br>tRNA synthetase /DB_XREF=gi:577711 /UG=Hs.75280 glycyl-tRNA synthetase /FL=gb:D30658.1 gb:U09587.1<br>gb:NM_002047.1                                                                                                                                         |
| 219100_at   | -1.94 | gb:NM_024928.1 /DEF=Homo sapiens hypothetical protein FLJ22559 (FLJ22559), mRNA. /FEA=mRNA<br>/GEN=FLJ22559 /PROD=hypothetical protein FLJ22559 /DB_XREF=gi:13487922 /UG=Hs.273387 hypothetical<br>protein FLJ22559 /FL=gb:NM_024928.1                                                                                                                              |
| 218138_at   | -1.95 | gb:NM_018848.1 /DEF=Homo sapiens McKusick-Kaufman syndrome (MKKS), mRNA. /FEA=mRNA /GEN=MKKS<br>/PROD=McKusick-Kaufman syndrome protein /DB_XREF=gi:9055271 /UG=Hs.46743 McKusick-Kaufman<br>syndrome /FL=gb:AF275813.1 gb:AF221992.1 gb:AF221993.1 gb:NM_018848.1                                                                                                  |
| 202402_s_at | -1.95 | gb:NM_001751.1 /DEF=Homo sapiens cysteinyl-tRNA synthetase (CARS), mRNA. /FEA=mRNA /GEN=CARS<br>/PROD=cysteinyl-tRNA synthetase /DB_XREF=gi:10835050 /UG=Hs.159604 cysteinyl-tRNA synthetase<br>/FL=gb:NM_001751.1 gb:BC002880.1 gb:AF288206.1 gb:AF288207.1                                                                                                        |
| 200769_s_at | -1.96 | gb:NM_005911.1 /DEF=Homo sapiens methionine adenosyltransferase II, alpha (MAT2A), mRNA. /FEA=mRNA<br>/GEN=MAT2A /PROD=methionine adenosyltransferase II, alpha /DB_XREF=gi:5174528 /UG=Hs.77502<br>methionine adenosyltransferase II, alpha /FL=gb:BC001686.1 gb:BC001854.1 gb:NM_005911.1                                                                         |
| 212325_at   | -1.97 | Consensus includes gb:AK027231.1 /DEF=Homo sapiens cDNA: FLJ23578 fis, clone LNG12709. /FEA=mRNA<br>/DB_XREF=gi:10440313 /UG=Hs.202949 KIAA1102 protein                                                                                                                                                                                                             |
| 222282_at   | -1.97 | Consensus includes gb:AV761453 /FEA=EST /DB_XREF=gi:10919301 /DB_XREF=est:AV761453<br>/CLONE=MDSBZA03 /UG=Hs.294014 ESTs                                                                                                                                                                                                                                            |
| 203223_at   | -1.97 | gb:NM_004703.1 /DEF=Homo sapiens rabaptin-5 (RAB5EP), mRNA. /FEA=mRNA /GEN=RAB5EP<br>/PROD=rabaptin-5 /DB_XREF=gi:4759005 /UG=Hs.326056 rabaptin-5 /FL=gb:NM_004703.1                                                                                                                                                                                               |
| 208933_s_at | -1.98 | Consensus includes gb:A1659005 /FEA=EST /DB_XREF=gi:4762575 /DB_XREF=est:tu23e02.x1<br>/CLONE=IMAGE:2251898 /UG=Hs.4082 lectin, galactoside-binding, soluble, 8 (galectin 8) /FL=gb:AF342815.1<br>gb:L78132.1 gb:AF074000.1 gb:NM_006499.1                                                                                                                          |
| 218276_s_at | -1.98 | gb:NM_021818.1 /DEF=Homo sapiens WW Domain-Containing Gene (WW45), mRNA. /FEA=mRNA /GEN=WW45<br>/PROD=WW Domain-Containing Gene /DB_XREF=gi:11141888 /UG=Hs.288906 WW Domain-Containing Gene<br>/FL=gb:NM_021818.1                                                                                                                                                  |

|             |       |                                                                                                                                                                                                                                                                                                                                                                                                                       |
|-------------|-------|-----------------------------------------------------------------------------------------------------------------------------------------------------------------------------------------------------------------------------------------------------------------------------------------------------------------------------------------------------------------------------------------------------------------------|
| 215012_at   | -1.98 | Consensus includes gb:AU144775 /FEA=EST /DB_XREF=gi:11006296 /DB_XREF=est:AU144775 /CLONE=HEMBA1002935 /UG=Hs.172329 KIAA0576 protein                                                                                                                                                                                                                                                                                 |
| 203459_s_at | -1.98 | gb:NM_022575.1 /DEF=Homo sapiens vacuolar protein sorting 16 (yeast homolog) (VPS16), mRNA. /FEA=mRNA /GEN=VPS16 /PROD=vacuolar protein sorting 16 (yeast homolog) /DB_XREF=gi:12007657 /UG=Hs.302441 vacuolar protein sorting 16 (yeast homolog) /FL=gb:AF308801.1 gb:NM_022575.1                                                                                                                                    |
| 221771_s_at | -1.98 | Consensus includes gb:BC003542.1 /DEF=Homo sapiens, clone IMAGE:3611719, mRNA, partial cds. /FEA=mRNA /PROD=Unknown (protein for IMAGE:3611719) /DB_XREF=gi:13097656 /UG=Hs.244482 Homo sapiens, clone IMAGE:3611719, mRNA, partial cds                                                                                                                                                                               |
| 207564_x_at | -1.98 | gb:NM_003605.2 /DEF=Homo sapiens O-linked N-acetylglucosamine (GlcNAc) transferase (UDP-N-acetylglucosamine:polypeptide-N-acetylglucosaminyl transferase) (OGT), mRNA. /FEA=mRNA /GEN=OGT /PROD=O-linked GlcNAc transferase /DB_XREF=gi:6006036 /UG=Hs.100293 O-linked N-acetylglucosamine (GlcNAc) transferase (UDP-N-acetylglucosamine:polypeptide-N-acetylglucosaminyl transferase) /FL=gb:U77413.1 gb:NM_003605.2 |
| 205063_at   | -1.98 | gb:NM_003616.1 /DEF=Homo sapiens survival of motor neuron protein interacting protein 1 (SIP1), mRNA. /FEA=mRNA /GEN=SIP1 /PROD=survival of motor neuron protein interactingprotein 1 /DB_XREF=gi:4506960 /UG=Hs.102456 survival of motor neuron protein interacting protein 1 /FL=gb:AF027150.1 gb:NM_003616.1                                                                                                       |
| 217776_at   | -1.99 | gb:AF167438.1 /DEF=Homo sapiens androgen-regulated short-chain dehydrogenasereductase 1 (ARSDR1) mRNA, complete cds. /FEA=mRNA /GEN=ARSDR1 /PROD=androgen-regulated short-chaindehydrogenasereductase 1 /DB_XREF=gi:9622123 /UG=Hs.179817 CGI-82 protein /FL=gb:BC000112.1 gb:AF151840.1 gb:NM_016026.1 gb:AF167438.1                                                                                                 |
| 202458_at   | -1.99 | gb:NM_007173.1 /DEF=Homo sapiens protease, serine, 23 (SPUVE), mRNA. /FEA=mRNA /GEN=SPUVE /PROD=protease, serine, 23 /DB_XREF=gi:6005881 /UG=Hs.325820 protease, serine, 23 /FL=gb:AL136914.1 gb:BC001278.1 gb:AF015287.1 gb:NM_007173.1 gb:AF193611.1                                                                                                                                                                |
| 220173_at   | -1.99 | gb:NM_025057.1 /DEF=Homo sapiens hypothetical protein FLJ23189 (FLJ23189), mRNA. /FEA=mRNA /GEN=FLJ23189 /PROD=hypothetical protein FLJ23189 /DB_XREF=gi:13376590 /UG=Hs.287733 hypothetical protein FLJ23189 /FL=gb:NM_025057.1                                                                                                                                                                                      |
| 212328_at   | -2    | Consensus includes gb:AB029025.1 /DEF=Homo sapiens mRNA for KIAA1102 protein, partial cds. /FEA=mRNA /GEN=KIAA1102 /PROD=KIAA1102 protein /DB_XREF=gi:5689540 /UG=Hs.202949 KIAA1102 protein                                                                                                                                                                                                                          |
| 218251_at   | -2    | gb:NM_021242.1 /DEF=Homo sapiens hypothetical protein STRAIT11499 (STRAIT11499), mRNA. /FEA=mRNA /GEN=STRAIT11499 /PROD=hypothetical protein STRAIT11499 /DB_XREF=gi:10864050 /UG=Hs.236556 hypothetical protein STRAIT11499 /FL=gb:NM_021242.1                                                                                                                                                                       |
| 203787_at   | -2.01 | gb:NM_012446.1 /DEF=Homo sapiens single-stranded-DNA-binding protein (SSBP2), mRNA. /FEA=mRNA /GEN=SSBP2 /PROD=single-stranded-DNA-binding protein /DB_XREF=gi:7106422 /UG=Hs.169833 single-stranded-DNA-binding protein /FL=gb:AL080076.1 gb:AF161465.1 gb:NM_012446.1                                                                                                                                               |
| 211657_at   | -2.01 | gb:M18728.1 /DEF=Human nonspecific crossreacting antigen mRNA, complete cds. /FEA=mRNA /GEN=NCA; NCA; NCA /PROD=non-specific cross reacting antigen /DB_XREF=gi:189084 /FL=gb:M18728.1                                                                                                                                                                                                                                |
| 204681_s_at | -2.01 | gb:NM_012294.1 /DEF=Homo sapiens guanine nucleotide exchange factor for Rap1; M-Ras-regulated GEF (KIAA0277), mRNA. /FEA=mRNA /GEN=KIAA0277 /PROD=guanine nucleotide exchange factor for Rap1;M-Ras-regulated GEF /DB_XREF=gi:6912455 /UG=Hs.80620 guanine nucleotide exchange factor for Rap1; M-Ras-regulated GEF /FL=gb:D87467.1 gb:NM_012294.1                                                                    |
| 202430_s_at | -2.01 | gb:NM_021105.1 /DEF=Homo sapiens phospholipid scramblase 1 (PLSCR1), mRNA. /FEA=mRNA /GEN=PLSCR1 /PROD=phospholipid scramblase 1 /DB_XREF=gi:10863876 /UG=Hs.198282 phospholipid scramblase 1 /FL=gb:NM_021105.1 gb:AB006746.1 gb:AF098642.1                                                                                                                                                                          |



|             |       |                                                                                                                                                                                                                                                                                                                                          |
|-------------|-------|------------------------------------------------------------------------------------------------------------------------------------------------------------------------------------------------------------------------------------------------------------------------------------------------------------------------------------------|
| 217653_x_at | -2.02 | Consensus includes gb:AW150065 /FEA=EST /DB_XREF=gi:6197971 /DB_XREF=est:yg48a10.x1 /CLONE=IMAGE:2630778 /UG=Hs.271957 ESTs                                                                                                                                                                                                              |
| 217738_at   | -2.02 | Consensus includes gb:BF575514 /FEA=EST /DB_XREF=gi:11649318 /DB_XREF=est:602133090F1 /CLONE=IMAGE:4288079 /UG=Hs.239138 pre-B-cell colony-enhancing factor /FL=gb:U02020.1 gb:NM_005746.1                                                                                                                                               |
| 218006_s_at | -2.02 | gb:NM_006963.1 /DEF=Homo sapiens zinc finger protein 22 (KOX 15) (ZNF22), mRNA. /FEA=mRNA /GEN=ZNF22 /PROD=zinc finger protein 22 (KOX 15) /DB_XREF=gi:5902159 /UG=Hs.108642 zinc finger protein 22 (KOX 15) /FL=gb:NM_006963.1                                                                                                          |
| 217906_at   | -2.02 | gb:NM_014315.1 /DEF=Homo sapiens host cell factor homolog (LCP), mRNA. /FEA=mRNA /GEN=LCP /PROD=host cell factor homolog /DB_XREF=gi:7657300 /UG=Hs.20597 host cell factor homolog /FL=gb:BC002335.1 gb:AF113131.1 gb:NM_014315.1 gb:AF244137.1                                                                                          |
| 217807_s_at | -2.02 | gb:NM_015710.1 /DEF=Homo sapiens glioma tumor suppressor candidate region gene 2 (GLTSCR2), mRNA. /FEA=mRNA /GEN=GLTSCR2 /PROD=glioma tumor suppressor candidate region gene 2 /DB_XREF=gi:7657129 /UG=Hs.2237 glioma tumor suppressor candidate region gene 2 /FL=gb:AF182076.1 gb:NM_015710.1                                          |
| 214012_at   | -2.02 | Consensus includes gb:BE551138 /FEA=EST /DB_XREF=gi:9792830 /DB_XREF=est:7b55a07.x1 /CLONE=IMAGE:3232116 /UG=Hs.247043 type 1 tumor necrosis factor receptor shedding aminopeptidase regulator                                                                                                                                           |
| 201816_s_at | -2.03 | gb:NM_001483.1 /DEF=Homo sapiens glioblastoma amplified sequence (GBAS), mRNA. /FEA=mRNA /GEN=GBAS /PROD=glioblastoma amplified sequence /DB_XREF=gi:4503936 /UG=Hs.152707 glioblastoma amplified sequence /FL=gb:BC000732.1 gb:BC001837.1 gb:AF029786.1 gb:NM_001483.1                                                                  |
| 213703_at   | -2.04 | Consensus includes gb:W95043 /FEA=EST /DB_XREF=gi:1424182 /DB_XREF=est:zh46c11.s1 /CLONE=IMAGE:415124 /UG=Hs.79732 fibulin 1                                                                                                                                                                                                             |
| 219754_at   | -2.04 | gb:NM_018301.1 /DEF=Homo sapiens hypothetical protein FLJ11016 (FLJ11016), mRNA. /FEA=mRNA /GEN=FLJ11016 /PROD=hypothetical protein FLJ11016 /DB_XREF=gi:8922825 /UG=Hs.210859 hypothetical protein FLJ11016 /FL=gb:NM_018301.1                                                                                                          |
| 220773_s_at | -2.05 | gb:NM_020806.1 /DEF=Homo sapiens gephyrin (GPH), mRNA. /FEA=mRNA /GEN=GPH /PROD=gephyrin /DB_XREF=gi:10880982 /UG=Hs.13405 gephyrin /FL=gb:NM_020806.1                                                                                                                                                                                   |
| 213122_at   | -2.05 | Consensus includes gb:AI096375 /FEA=EST /DB_XREF=gi:3446286 /DB_XREF=est:qb91e08.x1 /CLONE=IMAGE:1707494 /UG=Hs.173094 Homo sapiens mRNA for KIAA1750 protein, partial cds                                                                                                                                                               |
| 201415_at   | -2.05 | gb:NM_000178.1 /DEF=Homo sapiens glutathione synthetase (GSS), mRNA. /FEA=mRNA /GEN=GSS /PROD=glutathione synthetase /DB_XREF=gi:4504168 /UG=Hs.82327 glutathione synthetase /FL=gb:U34683.1 gb:NM_000178.1                                                                                                                              |
| 210372_s_at | -2.05 | gb:AF208012.1 /DEF=Homo sapiens tumor protein D52-like 2 (TPD52L2) mRNA, complete cds. /FEA=mRNA /GEN=TPD52L2 /PROD=tumor protein D52-like 2 /DB_XREF=gi:12246900 /UG=Hs.16611 tumor protein D52-like 1 /FL=gb:AF208012.1                                                                                                                |
| 204278_s_at | -2.05 | gb:NM_004215.1 /DEF=Homo sapiens estrogen receptor binding site associated, antigen, 9 (EBAG9), mRNA. /FEA=mRNA /GEN=EBAG9 /PROD=estrogen receptor binding site associated,antigen, 9 /DB_XREF=gi:4758229 /UG=Hs.9222 estrogen receptor binding site associated, antigen, 9 /FL=gb:BC005249.1 gb:AF006265.1 gb:AB007619.1 gb:NM_004215.1 |
| 213737_x_at | -2.05 | Consensus includes gb:AI620911 /FEA=EST /DB_XREF=gi:4630037 /DB_XREF=est:tu05d12.x1 /CLONE=IMAGE:2250167 /UG=Hs.205125 ESTs                                                                                                                                                                                                              |
| 210425_x_at | -2.05 | gb:AF164622.1 /DEF=Homo sapiens golgin-67 (GOLGA5) mRNA, complete cds. /FEA=mRNA /GEN=GOLGA5 /PROD=golgin-67 /DB_XREF=gi:7211437 /UG=Hs.182982 golgin-67 /FL=gb:AF163441.1 gb:AF164622.1                                                                                                                                                 |
| 205531_s_at | -2.06 | gb:NM_013267.1 /DEF=Homo sapiens breast cell glutaminase (GA), mRNA. /FEA=mRNA /GEN=GA                                                                                                                                                                                                                                                   |

|             |       |                                                                                                                                                                                                                                                                                                                                                                                                                                |
|-------------|-------|--------------------------------------------------------------------------------------------------------------------------------------------------------------------------------------------------------------------------------------------------------------------------------------------------------------------------------------------------------------------------------------------------------------------------------|
|             |       | /PROD=breast cell glutaminase /DB_XREF=gi:7019388 /UG=Hs.325443 breast cell glutaminase<br>/FL=gb:AF110330.1 gb:AF110331.1 gb:AF223944.1 gb:NM_013267.1                                                                                                                                                                                                                                                                        |
| 217941_s_at | -2.06 | gb:NM_018695.1 /DEF=Homo sapiens erbb2-interacting protein ERBIN (LOC55914), mRNA. /FEA=mRNA<br>/GEN=LOC55914 /PROD=erbb2-interacting protein ERBIN /DB_XREF=gi:8923908 /UG=Hs.8117 erbb2-interacting<br>protein ERBIN /FL=gb:AF263744.1 gb:NM_018695.1                                                                                                                                                                        |
| 213283_s_at | -2.06 | Consensus includes gb:BG285616 /FEA=EST /DB_XREF=gi:13037752 /DB_XREF=est:602380622F1<br>/CLONE=IMAGE:4498325 /UG=Hs.79971 sal (Drosophila)-like 2                                                                                                                                                                                                                                                                             |
| 205173_x_at | -2.06 | gb:NM_001779.1 /DEF=Homo sapiens CD58 antigen, (lymphocyte function-associated antigen 3) (CD58), mRNA.<br>/FEA=mRNA /GEN=CD58 /PROD=CD58 antigen, (lymphocyte function-associated antigen 3)<br>/DB_XREF=gi:4502676 /UG=Hs.75626 CD58 antigen, (lymphocyte function-associated antigen 3)<br>/FL=gb:NM_001779.1                                                                                                               |
| 214212_x_at | -2.06 | Consensus includes gb:A1928241 /FEA=EST /DB_XREF=gi:5664205 /DB_XREF=est:wo95g11.x1<br>/CLONE=IMAGE:2463140 /UG=Hs.75260 mitogen inducible 2                                                                                                                                                                                                                                                                                   |
| 221081_s_at | -2.06 | gb:NM_024901.1 /DEF=Homo sapiens hypothetical protein FLJ22457 (FLJ22457), mRNA. /FEA=mRNA<br>/GEN=FLJ22457 /PROD=hypothetical protein FLJ22457 /DB_XREF=gi:13376358 /UG=Hs.238707 hypothetical<br>protein FLJ22457 /FL=gb:NM_024901.1                                                                                                                                                                                         |
| 219767_s_at | -2.07 | gb:NM_005111.1 /DEF=Homo sapiens crystallin, zeta (quinone reductase)-like 1 (CRYZL1), mRNA. /FEA=mRNA<br>/GEN=CRYZL1 /PROD=crystallin, zeta (quinone reductase)-like 1 /DB_XREF=gi:4826679 /UG=Hs.330208<br>crystallin, zeta (quinone reductase)-like 1 /FL=gb:AF029689.1 gb:NM_005111.1                                                                                                                                      |
| 219513_s_at | -2.07 | gb:NM_005490.1 /DEF=Homo sapiens novel SH2-containing protein 1 (NSP1), mRNA. /FEA=mRNA /GEN=NSP1<br>/PROD=novel SH2-containing protein 1 /DB_XREF=gi:4885524 /UG=Hs.268541 novel SH2-containing protein 1<br>/FL=gb:AF124249.1 gb:NM_005490.1                                                                                                                                                                                 |
| 218637_at   | -2.07 | gb:NM_018439.1 /DEF=Homo sapiens hypothetical protein IMPACT (IMPACT), mRNA. /FEA=mRNA<br>/GEN=IMPACT /PROD=hypothetical protein IMPACT /DB_XREF=gi:8923818 /UG=Hs.284245 hypothetical protein<br>IMPACT /FL=gb:AF208694.1 gb:AB026264.1 gb:NM_018439.1                                                                                                                                                                        |
| 215208_x_at | -2.08 | Consensus includes gb:AK021571.1 /DEF=Homo sapiens cDNA FLJ11509 fis, clone HEMBA1002166.<br>/FEA=mRNA /DB_XREF=gi:10432777 /UG=Hs.289093 Homo sapiens cDNA FLJ11509 fis, clone HEMBA1002166                                                                                                                                                                                                                                   |
| 212177_at   | -2.08 | Consensus includes gb:AW081113 /FEA=EST /DB_XREF=gi:6036265 /DB_XREF=est:xc29c08.x1<br>/CLONE=IMAGE:2585678 /UG=Hs.18368 DKFZP564B0769 protein                                                                                                                                                                                                                                                                                 |
| 201685_s_at | -2.08 | gb:NM_014828.1 /DEF=Homo sapiens KIAA0737 gene product (KIAA0737), mRNA. /FEA=mRNA /GEN=KIAA0737<br>/PROD=KIAA0737 gene product /DB_XREF=gi:7662273 /UG=Hs.194035 KIAA0737 gene product<br>/FL=gb:AB018280.1 gb:NM_014828.1                                                                                                                                                                                                    |
| 212971_at   | -2.09 | Consensus includes gb:A1769685 /FEA=EST /DB_XREF=gi:5236194 /DB_XREF=est:wj25f08.x1<br>/CLONE=IMAGE:2403879 /UG=Hs.159604 cysteinyl-tRNA synthetase                                                                                                                                                                                                                                                                            |
| 218204_s_at | -2.09 | gb:NM_024513.1 /DEF=Homo sapiens FYVE and coiled-coil domain containing 1 (FYCO1), mRNA. /FEA=mRNA<br>/GEN=FYCO1 /PROD=FYVE and coiled-coil domain containing 1 /DB_XREF=gi:13470091 /UG=Hs.257267 FYVE<br>and coiled-coil domain containing 1 /FL=gb:NM_024513.1                                                                                                                                                              |
| 202990_at   | -2.09 | gb:NM_002863.1 /DEF=Homo sapiens phosphorylase, glycogen; liver (Hers disease, glycogen storage disease<br>type VI) (PYGL), mRNA. /FEA=mRNA /GEN=PYGL /PROD=phosphorylase, glycogen; liver (Hers<br>disease, glycogen storage disease type VI) /DB_XREF=gi:4506352 /UG=Hs.771 phosphorylase, glycogen; liver<br>(Hers disease, glycogen storage disease type VI) /FL=gb:M14636.1 gb:AF066858.1 gb:AF046785.1<br>gb:NM_002863.1 |
| 202536_at   | -2.09 | Consensus includes gb:AK002165.1 /DEF=Homo sapiens cDNA FLJ11303 fis, clone PLACE1009995, highly                                                                                                                                                                                                                                                                                                                               |

similar to Homo sapiens mRNA; cDNA DKFZp564O123. /FEA=mRNA /DB\_XREF=gi:7023876 /UG=Hs.11449  
DKFZP564O123 protein /FL=gb:AF151842.1 gb:AL080122.1 gb:NM\_014043.1

209481\_at -2.09 gb:AF226044.1 /DEF=Homo sapiens HSNFRK (HSNFRK) mRNA, complete cds. /FEA=mRNA /GEN=HSNFRK  
/PROD=HSNFRK /DB\_XREF=gi:9295326 /UG=Hs.79025 KIAA0096 protein /FL=gb:AF226044.1

206059\_at -2.1 gb:NM\_003430.1 /DEF=Homo sapiens zinc finger protein 91 (HPF7, HTF10) (ZNF91), mRNA. /FEA=mRNA  
/GEN=ZNF91 /PROD=zinc finger protein 91 (HPF7, HTF10) /DB\_XREF=gi:4508040 /UG=Hs.8597 zinc finger  
protein 91 (HPF7, HTF10) /FL=gb:L11672.1 gb:NM\_003430.1

209610\_s\_at -2.1 Consensus includes gb:BF340083 /FEA=EST /DB\_XREF=gi:11286545 /DB\_XREF=est:602037236F1  
/CLONE=IMAGE:4185248 /UG=Hs.323878 solute carrier family 1 (glutamate neutral amino acid transporter),  
member 4 /FL=gb:L14595.1 gb:NM\_003038.1 gb:L19444.1 gb:AB026689.1

218323\_at -2.1 gb:NM\_018307.1 /DEF=Homo sapiens hypothetical protein FLJ11040 (FLJ11040), mRNA. /FEA=mRNA  
/GEN=FLJ11040 /PROD=hypothetical protein FLJ11040 /DB\_XREF=gi:8922837 /UG=Hs.14202 hypothetical  
protein FLJ11040 /FL=gb:NM\_018307.1

207231\_at -2.1 gb:NM\_014648.1 /DEF=Homo sapiens KIAA0675 gene product (KIAA0675), mRNA. /FEA=mRNA /GEN=KIAA0675  
/PROD=KIAA0675 gene product /DB\_XREF=gi:7662243 /UG=Hs.165662 KIAA0675 gene product  
/FL=gb:AB014575.1 gb:NM\_014648.1

203140\_at -2.11 gb:NM\_001706.1 /DEF=Homo sapiens B-cell CLL lymphoma 6 (zinc finger protein 51) (BCL6), mRNA.  
/FEA=mRNA /GEN=BCL6 /PROD=B-cell CLL lymphoma 6 (zinc finger protein 51) /DB\_XREF=gi:4502382  
/UG=Hs.155024 B-cell CLL lymphoma 6 (zinc finger protein 51) /FL=gb:U00115.1 gb:NM\_001706.1

209098\_s\_at -2.11 gb:U61276.1 /DEF=Human transmembrane protein Jagged 1 (HJ1) mRNA, complete cds. /FEA=mRNA /GEN=HJ1  
/PROD=transmembrane protein Jagged 1 /DB\_XREF=gi:1438936 /UG=Hs.91143 jagged 1 (Alagille syndrome)  
/FL=gb:U61276.1 gb:U73936.1 gb:AF003837.1 gb:AF028593.1 gb:NM\_000214.1

218924\_s\_at -2.11 gb:NM\_004388.1 /DEF=Homo sapiens chitinase, di-N-acetyl- (CTBS), mRNA. /FEA=mRNA /GEN=CTBS  
/PROD=chitinase, di-N-acetyl- /DB\_XREF=gi:4758091 /UG=Hs.135578 chitinase, di-N-acetyl- /FL=gb:M95767.1  
gb:NM\_004388.1

203762\_s\_at -2.12 gb:NM\_016008.1 /DEF=Homo sapiens CGI-60 protein (LOC51626), mRNA. /FEA=mRNA /GEN=LOC51626  
/PROD=CGI-60 protein /DB\_XREF=gi:7706299 /UG=Hs.7627 CGI-60 protein /FL=gb:AF151818.1  
gb:NM\_016008.1

212675\_s\_at -2.12 Consensus includes gb:AB011154.1 /DEF=Homo sapiens mRNA for KIAA0582 protein, partial cds. /FEA=mRNA  
/GEN=KIAA0582 /PROD=KIAA0582 protein /DB\_XREF=gi:3043687 /UG=Hs.79507 KIAA0582 protein

203552\_at -2.12 Consensus includes gb:AW298170 /FEA=EST /DB\_XREF=gi:6704806 /DB\_XREF=est:UI-H-BW0-ajt-a-06-0-UI.s1  
/CLONE=IMAGE:2732819 /UG=Hs.246970 mitogen-activated protein kinase kinase kinase 5  
/FL=gb:U77129.1 gb:NM\_006575.1

212072\_s\_at -2.12 Consensus includes gb:AL049761 /DEF=Human DNA sequence from clone RP5-863C7 on chromosome 20p12.3-  
13. Contains the CSNK2A1 gene for casein kinase 2 alpha 1 polypeptide (EC 2.7.1.37), ESTs, STSs and GSSs  
/FEA=mRNA\_2 /DB\_XREF=gi:5738437 /UG=Hs.155140 casein kinase 2, alpha 1 polypeptide

211776\_s\_at -2.13 gb:BC006141.1 /DEF=Homo sapiens, Similar to erythrocyte protein band 4.1-like 3, clone MGC:13087, mRNA,  
complete cds. /FEA=mRNA /PROD=Similar to erythrocyte protein band 4.1-like 3 /DB\_XREF=gi:13544008  
/FL=gb:BC006141.1

211744\_s\_at -2.13 gb:BC005930.1 /DEF=Homo sapiens, Similar to CD58 antigen, (lymphocyte function-associated antigen 3), clone  
MGC:14538, mRNA, complete cds. /FEA=mRNA /PROD=Similar to CD58 antigen, (lymphocyte function-associated  
antigen 3) /DB\_XREF=gi:13543544 /FL=gb:BC005930.1

214544\_s\_at -2.13 Consensus includes gb:NM\_003825.1 /DEF=Homo sapiens synaptosomal-associated protein, 23kD (SNAP23),

|             |       |                                                                                                                                                                                                                                                                                                                                                                                                                                                                                  |
|-------------|-------|----------------------------------------------------------------------------------------------------------------------------------------------------------------------------------------------------------------------------------------------------------------------------------------------------------------------------------------------------------------------------------------------------------------------------------------------------------------------------------|
|             |       | mRNA. /FEA=CDS /GEN=SNAP23 /PROD=synaptosomal-associated protein, 23kD /DB_XREF=gi:4507096 /UG=Hs.184376 synaptosomal-associated protein, 23kD /FL=gb:Y09568.1 gb:NM_003825.1                                                                                                                                                                                                                                                                                                    |
| 219276_x_at | -2.13 | gb:NM_024828.1 /DEF=Homo sapiens hypothetical protein FLJ13657 (FLJ13657), mRNA. /FEA=mRNA /GEN=FLJ13657 /PROD=hypothetical protein FLJ13657 /DB_XREF=gi:13376229 /UG=Hs.178357 hypothetical protein FLJ13657 /FL=gb:NM_024828.1                                                                                                                                                                                                                                                 |
| 201810_s_at | -2.13 | Consensus includes gb:AL562152 /FEA=EST /DB_XREF=gi:12910291 /DB_XREF=est:AL562152 /CLONE=CS0DC001YK23 (3 prime) /UG=Hs.109150 SH3-domain binding protein 5 (BTK-associated) /FL=gb:AB005047.1 gb:NM_004844.1                                                                                                                                                                                                                                                                    |
| 209311_at   | -2.13 | gb:D87461.1 /DEF=Human mRNA for KIAA0271 gene, complete cds. /FEA=mRNA /GEN=KIAA0271 /DB_XREF=gi:1944417 /UG=Hs.75244 BCL2-like 2 /FL=gb:U59747.1 gb:D87461.1 gb:NM_004050.1                                                                                                                                                                                                                                                                                                     |
| 60794_f_at  | -2.13 | Cluster Incl. AI400621:tg49g02.x1 Homo sapiens cDNA, 3 end /clone=IMAGE-2112146 /clone_end=3 /gb=AI400621 /gi=4243708 /ug=Hs.213640 /len=529                                                                                                                                                                                                                                                                                                                                     |
| 203757_s_at | -2.13 | gb:BC005008.1 /DEF=Homo sapiens, carcinoembryonic antigen-related cell adhesion molecule 6 (non-specific cross reacting antigen), clone MGC:10467, mRNA, complete cds. /FEA=mRNA /PROD=carcinoembryonic antigen-related cell adhesionmolecule 6 (non-specific cross reacting antigen) /DB_XREF=gi:13477106 /UG=Hs.73848 carcinoembryonic antigen-related cell adhesion molecule 6 (non-specific cross reacting antigen) /FL=gb:BC005008.1 gb:M18216.1 gb:M29541.1 gb:NM_002483.1 |
| 215304_at   | -2.14 | Consensus includes gb:U79293.1 /DEF=Human clone 23948 mRNA sequence. /FEA=mRNA /DB_XREF=gi:1710274 /UG=Hs.159264 Human clone 23948 mRNA sequence                                                                                                                                                                                                                                                                                                                                 |
| 201941_at   | -2.14 | Consensus includes gb:BE349147 /FEA=EST /DB_XREF=gi:9261086 /DB_XREF=est:ht51f05.x1 /CLONE=IMAGE:3150273 /UG=Hs.5057 carboxypeptidase D /FL=gb:U65090.1 gb:D85390.1 gb:NM_001304.2                                                                                                                                                                                                                                                                                               |
| 215079_at   | -2.15 | Consensus includes gb:AK026723.1 /DEF=Homo sapiens cDNA: FLJ23070 fis, clone LNG05629. /FEA=mRNA /DB_XREF=gi:10439641 /UG=Hs.30579 Homo sapiens cDNA: FLJ23070 fis, clone LNG05629                                                                                                                                                                                                                                                                                               |
| 205891_at   | -2.15 | gb:NM_000676.1 /DEF=Homo sapiens adenosine A2b receptor (ADORA2B), mRNA. /FEA=mRNA /GEN=ADORA2B /PROD=adenosine A2b receptor /DB_XREF=gi:4501950 /UG=Hs.45743 adenosine A2b receptor /FL=gb:M97759.1 gb:NM_000676.1                                                                                                                                                                                                                                                              |
| 207267_s_at | -2.16 | gb:NM_018962.1 /DEF=Homo sapiens Down syndrome critical region gene 6 (DSCR6), mRNA. /FEA=mRNA /GEN=DSCR6 /PROD=Down syndrome critical region protein 6 /DB_XREF=gi:9506556 /UG=Hs.254560 Down syndrome critical region gene 6 /FL=gb:AB037158.1 gb:NM_018962.1                                                                                                                                                                                                                  |
| 203355_s_at | -2.16 | gb:NM_015310.1 /DEF=Homo sapiens KIAA0942 protein (KIAA0942), mRNA. /FEA=mRNA /GEN=KIAA0942 /PROD=KIAA0942 protein /DB_XREF=gi:7662395 /UG=Hs.6763 KIAA0942 protein /FL=gb:AF243495.2 gb:NM_015310.1                                                                                                                                                                                                                                                                             |
| 203553_s_at | -2.16 | gb:NM_006575.1 /DEF=Homo sapiens mitogen-activated protein kinase kinase kinase kinase 5 (MAP4K5), mRNA. /FEA=mRNA /GEN=MAP4K5 /PROD=mitogen-activated protein kinase kinase kinasekinase /DB_XREF=gi:5729890 /UG=Hs.246970 mitogen-activated protein kinase kinase kinase kinase 5 /FL=gb:U77129.1 gb:NM_006575.1                                                                                                                                                               |
| 216858_x_at | -2.16 | Consensus includes gb:AL080112.1 /DEF=Homo sapiens mRNA; cDNA DKFZp586H0722 (from clone DKFZp586H0722). /FEA=mRNA /DB_XREF=gi:5262539 /UG=Hs.332731 Homo sapiens mRNA; cDNA DKFZp586H0722 (from clone DKFZp586H0722)                                                                                                                                                                                                                                                             |
| 218307_at   | -2.16 | gb:NM_018346.1 /DEF=Homo sapiens hypothetical protein FLJ11164 (FLJ11164), mRNA. /FEA=mRNA /GEN=FLJ11164 /PROD=hypothetical protein FLJ11164 /DB_XREF=gi:8922910 /UG=Hs.8033 hypothetical protein FLJ11164 /FL=gb:NM_018346.1                                                                                                                                                                                                                                                    |
| 204350_s_at | -2.17 | gb:NM_004270.1 /DEF=Homo sapiens cofactor required for Sp1 transcriptional activation, subunit 9 (33kD)                                                                                                                                                                                                                                                                                                                                                                          |

(CRSP9), mRNA. /FEA=mRNA /GEN=CRSP9 /PROD=cofactor required for Sp1 transcriptional activation, subunit 9 (33kD) /DB\_XREF=gi:4758063 /UG=Hs.279902 cofactor required for Sp1 transcriptional activation, subunit 9 (33kD) /FL=gb:BC005250.1 gb:AF031383.1 gb:AF104251.1 gb:NM\_004270.1

213273\_at -2.17 Consensus includes gb:BF112171 /FEA=EST /DB\_XREF=gi:10941861 /DB\_XREF=est:7148d06.x1 /CLONE=IMAGE:3524770 /UG=Hs.5028 DKFZP564O0423 protein

212634\_at -2.17 Consensus includes gb:AW298092 /FEA=EST /DB\_XREF=gi:6704728 /DB\_XREF=est:UI-H-BW0-ajs-b-03-0-UI.s1 /CLONE=IMAGE:2732860 /UG=Hs.5460 KIAA0776 protein

219973\_at -2.17 gb:NM\_024590.1 /DEF=Homo sapiens hypothetical protein FLJ23548 (FLJ23548), mRNA. /FEA=mRNA /GEN=FLJ23548 /PROD=hypothetical protein FLJ23548 /DB\_XREF=gi:13375780 /UG=Hs.22895 hypothetical protein FLJ23548 /FL=gb:NM\_024590.1

212183\_at -2.18 Consensus includes gb:AW511135 /FEA=EST /DB\_XREF=gi:7149213 /DB\_XREF=est:hd43g08.x1 /CLONE=IMAGE:2912318 /UG=Hs.92381 nudix (nucleoside diphosphate linked moiety X)-type motif 4

203765\_at -2.18 gb:NM\_012198.1 /DEF=Homo sapiens grancalcin (GCL), mRNA. /FEA=mRNA /GEN=GCL /PROD=grancalcin /DB\_XREF=gi:6912387 /UG=Hs.79381 grancalcin /FL=gb:BC005214.1 gb:M81637.1 gb:NM\_012198.1

217988\_at -2.18 gb:NM\_021178.1 /DEF=Homo sapiens enhancer of invasion 10 (HEI10), mRNA. /FEA=mRNA /GEN=HEI10 /PROD=enhancer of invasion 10 /DB\_XREF=gi:10863978 /UG=Hs.107003 enhancer of invasion 10 /FL=gb:NM\_021178.1 gb:BC000369.1 gb:BC001218.1 gb:BC004435.1 gb:AF216381.1

204682\_at -2.18 gb:NM\_000428.1 /DEF=Homo sapiens latent transforming growth factor beta binding protein 2 (LTBP2), mRNA. /FEA=mRNA /GEN=LTBP2 /PROD=latent transforming growth factor beta binding protein 2 /DB\_XREF=gi:4557732 /UG=Hs.83337 latent transforming growth factor beta binding protein 2 /FL=gb:NM\_000428.1

209442\_x\_at -2.19 gb:AL136710.1 /DEF=Homo sapiens mRNA; cDNA DKFZp566P0524 (from clone DKFZp566P0524); complete cds. /FEA=mRNA /GEN=DKFZp566P0524 /PROD=hypothetical protein /DB\_XREF=gi:12052939 /UG=Hs.75893 ankyrin 3, node of Ranvier (ankyrin G) /FL=gb:AL136710.1

221729\_at -2.19 Consensus includes gb:AL575735 /FEA=EST /DB\_XREF=gi:12937190 /DB\_XREF=est:AL575735 /CLONE=CS0DI070YK23 (3 prime) /UG=Hs.82985 collagen, type V, alpha 2 /FL=gb:NM\_000393.1

203538\_at -2.19 gb:NM\_001745.1 /DEF=Homo sapiens calcium modulating ligand (CAMLG), mRNA. /FEA=mRNA /GEN=CAMLG /PROD=calcium modulating ligand /DB\_XREF=gi:4502558 /UG=Hs.13572 calcium modulating ligand /FL=gb:NM\_001745.1 gb:U18242.1

220266\_s\_at -2.19 gb:NM\_004235.1 /DEF=Homo sapiens Kruppel-like factor 4 (gut) (KLF4), mRNA. /FEA=mRNA /GEN=KLF4 /PROD=Kruppel-like factor 4 (gut) /DB\_XREF=gi:4758321 /UG=Hs.7934 Kruppel-like factor 4 (gut) /FL=gb:U70663.1 gb:AF022184.1 gb:NM\_004235.1 gb:AF105036.1

212976\_at -2.19 Consensus includes gb:R41498 /FEA=EST /DB\_XREF=gi:816800 /DB\_XREF=est:yf86h08.s1 /CLONE=IMAGE:29486 /UG=Hs.199243 KIAA0231 protein

213929\_at -2.19 Consensus includes gb:AL050204.1 /DEF=Homo sapiens mRNA; cDNA DKFZp586F1223 (from clone DKFZp586F1223). /FEA=mRNA /DB\_XREF=gi:4884443 /UG=Hs.28540 Homo sapiens mRNA; cDNA DKFZp586F1223 (from clone DKFZp586F1223)

218446\_s\_at -2.2 gb:NM\_016078.1 /DEF=Homo sapiens CGI-148 protein (LOC51030), mRNA. /FEA=mRNA /GEN=LOC51030 /PROD=CGI-148 protein /DB\_XREF=gi:7705643 /UG=Hs.6776 CGI-148 protein /FL=gb:AF151906.1 gb:AF223467.1 gb:NM\_016078.1

209004\_s\_at -2.2 gb:AF142481.1 /DEF=Homo sapiens F-box protein FLR1 (FLR1) mRNA, complete cds. /FEA=mRNA /GEN=FLR1 /PROD=F-box protein FLR1 /DB\_XREF=gi:7672733 /UG=Hs.5548 f-box and leucine-rich repeat protein 5 /FL=gb:AF199420.1 gb:AF142481.1 gb:AF157323.1

206652\_at -2.2 gb:NM\_016384.1 /DEF=Homo sapiens hypothetical protein (HSPC050), mRNA. /FEA=mRNA /GEN=HSPC050

|             |       |                                                                                                                                                                                                                                                                                                                                                                                                                                                                                                     |
|-------------|-------|-----------------------------------------------------------------------------------------------------------------------------------------------------------------------------------------------------------------------------------------------------------------------------------------------------------------------------------------------------------------------------------------------------------------------------------------------------------------------------------------------------|
|             |       | /PROD=hypothetical protein /DB_XREF=gi:7705438 /UG=Hs.278985 hypothetical protein /FL=gb:AF161535.1 gb:NM_016384.1                                                                                                                                                                                                                                                                                                                                                                                  |
| 217106_x_at | -2.21 | Consensus includes gb:AF091078.1 /DEF=Homo sapiens clone 559 unknown mRNA, complete sequence. /FEA=mRNA /PROD=unknown /DB_XREF=gi:3859993 /UG=Hs.125819 putative dimethyladenosine transferase                                                                                                                                                                                                                                                                                                      |
| 213995_at   | -2.21 | Consensus includes gb:AW195882 /FEA=EST /DB_XREF=gi:6475112 /DB_XREF=est:xn86c10.x1 /CLONE=IMAGE:2701362 /UG=Hs.56155 hypothetical protein                                                                                                                                                                                                                                                                                                                                                          |
| 201761_at   | -2.21 | gb:NM_006636.2 /DEF=Homo sapiens methylene tetrahydrofolate dehydrogenase (NAD+ dependent), methenyltetrahydrofolate cyclohydrolase (MTHFD2), nuclear gene encoding mitochondrial protein, mRNA. /FEA=mRNA /GEN=MTHFD2 /PROD=methylene tetrahydrofolate dehydrogenase (NAD+ dependent), methenyltetrahydrofolate cyclohydrolase, precursor /DB_XREF=gi:13699869 /UG=Hs.154672 methylene tetrahydrofolate dehydrogenase (NAD+ dependent), methenyltetrahydrofolate cyclohydrolase /FL=gb:NM_006636.2 |
| 204388_s_at | -2.21 | gb:NM_000240.1 /DEF=Homo sapiens monoamine oxidase A (MAOA), nuclear gene encoding mitochondrial protein, mRNA. /FEA=mRNA /GEN=MAOA /PROD=monoamine oxidase A /DB_XREF=gi:4557734 /UG=Hs.183109 monoamine oxidase A /FL=gb:M68840.1 gb:M69226.1 gb:NM_000240.1                                                                                                                                                                                                                                      |
| 216028_at   | -2.21 | Consensus includes gb:AL049980.1 /DEF=Homo sapiens mRNA; cDNA DKFZp564C152 (from clone DKFZp564C152). /FEA=mRNA /GEN=DKFZp564C152 /PROD=hypothetical protein /DB_XREF=gi:4884230 /UG=Hs.184216 DKFZP564C152 protein                                                                                                                                                                                                                                                                                 |
| 217999_s_at | -2.21 | Consensus includes gb:NM_007350.1 /DEF=Homo sapiens pleckstrin homology-like domain, family A, member 1 (PHLDA1), mRNA. /FEA=mRNA /GEN=PHLDA1 /PROD=pleckstrin homology-like domain, family A, member 1 /DB_XREF=gi:6679302 /UG=Hs.82101 pleckstrin homology-like domain, family A, member 1 /FL=gb:NM_007350.1                                                                                                                                                                                     |
| 219572_at   | -2.22 | gb:NM_017954.1 /DEF=Homo sapiens hypothetical protein FLJ20761 (FLJ20761), mRNA. /FEA=mRNA /GEN=FLJ20761 /PROD=hypothetical protein FLJ20761 /DB_XREF=gi:8923671 /UG=Hs.107872 hypothetical protein FLJ20761 /FL=gb:NM_017954.1                                                                                                                                                                                                                                                                     |
| 203565_s_at | -2.22 | gb:NM_002431.1 /DEF=Homo sapiens menage a trois 1 (CAK assembly factor) (MNAT1), mRNA. /FEA=mRNA /GEN=MNAT1 /PROD=menage a trois 1 (CAK assembly factor) /DB_XREF=gi:4505224 /UG=Hs.82380 menage a trois 1 (CAK assembly factor) /FL=gb:BC000820.1 gb:NM_002431.1                                                                                                                                                                                                                                   |
| 218789_s_at | -2.22 | gb:NM_019021.1 /DEF=Homo sapiens hypothetical protein (FLJ20010), mRNA. /FEA=mRNA /GEN=FLJ20010 /PROD=hypothetical protein /DB_XREF=gi:9506646 /UG=Hs.91816 hypothetical protein /FL=gb:NM_019021.1                                                                                                                                                                                                                                                                                                 |
| 204791_at   | -2.22 | gb:NM_003297.1 /DEF=Homo sapiens nuclear receptor subfamily 2, group C, member 1 (NR2C1), mRNA. /FEA=mRNA /GEN=NR2C1 /PROD=nuclear receptor subfamily 2, group C, member 1 /DB_XREF=gi:4507672 /UG=Hs.108301 nuclear receptor subfamily 2, group C, member 1 /FL=gb:M29960.1 gb:NM_003297.1                                                                                                                                                                                                         |
| 218859_s_at | -2.22 | gb:NM_016649.1 /DEF=Homo sapiens HDCMC28P protein (HDCMC28P), mRNA. /FEA=mRNA /GEN=HDCMC28P /PROD=HDCMC28P protein /DB_XREF=gi:7705402 /UG=Hs.88820 HDCMC28P protein /FL=gb:AF068285.1 gb:NM_016649.1                                                                                                                                                                                                                                                                                               |
| 218352_at   | -2.22 | gb:NM_018191.1 /DEF=Homo sapiens hypothetical protein FLJ10716 (FLJ10716), mRNA. /FEA=mRNA /GEN=FLJ10716 /PROD=hypothetical protein FLJ10716 /DB_XREF=gi:8922616 /UG=Hs.24129 hypothetical protein FLJ10716 /FL=gb:NM_018191.1                                                                                                                                                                                                                                                                      |
| 213320_at   | -2.22 | Consensus includes gb:AL551971 /FEA=EST /DB_XREF=gi:12890422 /DB_XREF=est:AL551971 /CLONE=CS0DI060YG02 (3 prime) /UG=Hs.152337 protein arginine N-methyltransferase 3(hnRNP methyltransferase S. cerevisiae)-like 3                                                                                                                                                                                                                                                                                 |
| 210621_s_at | -2.22 | gb:M23612.1 /DEF=Human GTPase-activating protein (GAP) mRNA, complete cds. /FEA=mRNA /GEN=GAP /PROD=GTPase-activating protein /DB_XREF=gi:182973 /UG=Hs.758 RAS p21 protein activator (GTPase                                                                                                                                                                                                                                                                                                       |

|             |       |                                                                                                                                                                                                                                                                                                                                                                                                               |
|-------------|-------|---------------------------------------------------------------------------------------------------------------------------------------------------------------------------------------------------------------------------------------------------------------------------------------------------------------------------------------------------------------------------------------------------------------|
| 219976_at   | -2.23 | activating protein) 1 /FL=gb:NM_022650.1 gb:M23612.1<br>gb:NM_015888.1 /DEF=Homo sapiens hook1 protein (HOOK1), mRNA. /FEA=mRNA /GEN=HOOK1 /PROD=hook1 protein /DB_XREF=gi:7705414 /UG=Hs.250752 hook1 protein /FL=gb:AF044923.1 gb:NM_015888.1                                                                                                                                                               |
| 218706_s_at | -2.23 | Consensus includes gb:AW575493 /FEA=EST /DB_XREF=gi:7247032 /DB_XREF=est:UI-HF-BM0-adp-a-04-0-UI.s1 /CLONE=IMAGE:3062287 /UG=Hs.235445 hypothetical protein FLJ21313 /FL=gb:NM_023927.1                                                                                                                                                                                                                       |
| 220936_s_at | -2.23 | gb:NM_018267.1 /DEF=Homo sapiens hypothetical protein FLJ10903 (FLJ10903), mRNA. /FEA=mRNA /GEN=FLJ10903 /PROD=hypothetical protein FLJ10903 /DB_XREF=gi:8922757 /UG=Hs.36727 hypothetical protein FLJ10903 /FL=gb:NM_018267.1                                                                                                                                                                                |
| 213425_at   | -2.23 | Consensus includes gb:AI968085 /FEA=EST /DB_XREF=gi:5764903 /DB_XREF=est:wu12h08.x1 /CLONE=IMAGE:2516799 /UG=Hs.152213 wingless-type MMTV integration site family, member 5A                                                                                                                                                                                                                                  |
| 205768_s_at | -2.24 | gb:NM_003645.1 /DEF=Homo sapiens fatty-acid-Coenzyme A ligase, very long-chain 1 (FACVL1), mRNA. /FEA=mRNA /GEN=FACVL1 /PROD=very long-chain fatty-acid-Coenzyme A ligase 1 /DB_XREF=gi:4503652 /UG=Hs.11729 fatty-acid-Coenzyme A ligase, very long-chain 1 /FL=gb:D88308.1 gb:AF096290.1 gb:NM_003645.1                                                                                                     |
| 207326_at   | -2.24 | gb:NM_001729.1 /DEF=Homo sapiens betacellulin (BTC), mRNA. /FEA=mRNA /GEN=BTC /PROD=betacellulin /DB_XREF=gi:4502460 /UG=Hs.73105 betacellulin /FL=gb:NM_001729.1                                                                                                                                                                                                                                             |
| 219957_at   | -2.24 | gb:NM_017987.1 /DEF=Homo sapiens hypothetical protein FLJ10063 (FLJ10063), mRNA. /FEA=mRNA /GEN=FLJ10063 /PROD=hypothetical protein FLJ10063 /DB_XREF=gi:8922215 /UG=Hs.154091 hypothetical protein FLJ10063 /FL=gb:NM_017987.1                                                                                                                                                                               |
| 218371_s_at | -2.25 | gb:NM_018282.1 /DEF=Homo sapiens hypothetical protein FLJ10955 (FLJ10955), mRNA. /FEA=mRNA /GEN=FLJ10955 /PROD=hypothetical protein FLJ10955 /DB_XREF=gi:8922788 /UG=Hs.16364 hypothetical protein FLJ10955 /FL=gb:NM_018282.1                                                                                                                                                                                |
| 205194_at   | -2.25 | gb:NM_004577.1 /DEF=Homo sapiens phosphoserine phosphatase (PSPH), mRNA. /FEA=mRNA /GEN=PSPH /PROD=phosphoserine phosphatase /DB_XREF=gi:4758971 /UG=Hs.56407 phosphoserine phosphatase /FL=gb:NM_004577.1                                                                                                                                                                                                    |
| 212327_at   | -2.25 | Consensus includes gb:AK026815.1 /DEF=Homo sapiens cDNA: FLJ23162 fis, clone LNG09734. /FEA=mRNA /DB_XREF=gi:10439759 /UG=Hs.202949 KIAA1102 protein                                                                                                                                                                                                                                                          |
| 213540_at   | -2.26 | Consensus includes gb:AL031228 /DEF=Human DNA sequence from clone 1033B10 on chromosome 6p21.2-21.31. Contains the BING5 gene, exons 11 to 15 of the BING4 gene, the gene for GalT3 (beta3-Galactosyltransferase), the RPS18 (40S ribosomal protein S18) gene, the SACM2L (suppressor of ac... /FEA=mRNA_1 /DB_XREF=gi:3646023 /UG=Hs.288354 FabG (beta-ketoacyl-acyl-carrier-protein reductase, E coli) like |
| 203169_at   | -2.26 | gb:NM_014785.1 /DEF=Homo sapiens KIAA0258 gene product (KIAA0258), mRNA. /FEA=mRNA /GEN=KIAA0258 /PROD=KIAA0258 gene product /DB_XREF=gi:7662029 /UG=Hs.47313 KIAA0258 gene product /FL=gb:BC001725.1 gb:D87447.1 gb:NM_014785.1                                                                                                                                                                              |
| 214440_at   | -2.26 | Consensus includes gb:NM_000662.1 /DEF=Homo sapiens N-acetyltransferase 1 (arylamine N-acetyltransferase) (NAT1), mRNA. /FEA=CDS /GEN=NAT1 /PROD=N-acetyltransferase 1 /DB_XREF=gi:4505334 /UG=Hs.155956 N-acetyltransferase 1 (arylamine N-acetyltransferase) /FL=gb:NM_000662.1                                                                                                                             |
| 218804_at   | -2.26 | gb:NM_018043.1 /DEF=Homo sapiens hypothetical protein FLJ10261 (FLJ10261), mRNA. /FEA=mRNA /GEN=FLJ10261 /PROD=hypothetical protein FLJ10261 /DB_XREF=gi:8922319 /UG=Hs.26176 hypothetical protein FLJ10261 /FL=gb:NM_018043.1                                                                                                                                                                                |
| 203232_s_at | -2.26 | gb:NM_000332.1 /DEF=Homo sapiens spinocerebellar ataxia 1 (olivopontocerebellar ataxia 1, autosomal                                                                                                                                                                                                                                                                                                           |

dominant, ataxin 1) (SCA1), mRNA. /FEA=mRNA /GEN=SCA1 /PROD=ataxin 1 /DB\_XREF=gi:4506792 /UG=Hs.74520 spinocerebellar ataxia 1 (olivopontocerebellar ataxia 1, autosomal dominant, ataxin 1) /FL=gb:NM\_000332.1

213110\_s\_at -2.26 Consensus includes gb:AW052179 /FEA=EST /DB\_XREF=gi:5914538 /DB\_XREF=est:wx26h09.x1 /CLONE=IMAGE:2544833 /UG=Hs.169825 collagen, type IV, alpha 5 (Alport syndrome) /FL=gb:NM\_000495.2

204838\_s\_at -2.26 gb:NM\_014381.1 /DEF=Homo sapiens mutL (E. coli) homolog 3 (MLH3), mRNA. /FEA=mRNA /GEN=MLH3 /PROD=mutL (E. coli) homolog 3 /DB\_XREF=gi:7657336 /UG=Hs.279843 mutL (E. coli) homolog 3 /FL=gb:AF195657.1 gb:NM\_014381.1

216805\_at -2.26 Consensus includes gb:AK027254.1 /DEF=Homo sapiens cDNA: FLJ23601 fis, clone LNG15501. /FEA=mRNA /DB\_XREF=gi:10440343 /UG=Hs.306918 Homo sapiens cDNA: FLJ23601 fis, clone LNG15501

208181\_at -2.27 gb:NM\_003543.2 /DEF=Homo sapiens H4 histone family, member H (H4FH), mRNA. /FEA=mRNA /GEN=H4FH /PROD=H4 histone family, member H /DB\_XREF=gi:5579466 /UG=Hs.93758 H4 histone family, member H /FL=gb:NM\_003543.2

200704\_at -2.27 gb:AB034747.1 /DEF=Homo sapiens SIMPLE mRNA for small integral membrane protein of lysosomelate endosome, complete cds. /FEA=mRNA /GEN=SIMPLE /PROD=small integral membrane protein of lysosomelateendosome /DB\_XREF=gi:12862475 /UG=Hs.76507 LPS-induced TNF-alpha factor /FL=gb:AB034747.1 gb:U77396.1 gb:AF010312.1 gb:NM\_004862.1

209112\_at -2.27 gb:BC001971.1 /DEF=Homo sapiens, Similar to cyclin-dependent kinase inhibitor 1B (p27, Kip1), clone MGC:5304, mRNA, complete cds. /FEA=mRNA /PROD=Similar to cyclin-dependent kinase inhibitor 1B(p27, Kip1) /DB\_XREF=gi:12805034 /UG=Hs.238990 cyclin-dependent kinase inhibitor 1B (p27, Kip1) /FL=gb:BC001971.1 gb:NM\_004064.1 gb:U10906.1 gb:AF247551.1 gb:AY004255.1

203439\_s\_at -2.27 gb:BC000658.1 /DEF=Homo sapiens, stanniocalcin 2, clone MGC:1881, mRNA, complete cds. /FEA=mRNA /PROD=stanniocalcin 2 /DB\_XREF=gi:12653744 /UG=Hs.155223 stanniocalcin 2 /FL=gb:BC000658.1 gb:AF055460.1 gb:AB012664.1 gb:AF098462.1 gb:AF031036.1 gb:NM\_003714.1

214007\_s\_at -2.27 Consensus includes gb:AW665024 /FEA=EST /DB\_XREF=gi:7457569 /DB\_XREF=est:hi86c09.x1 /CLONE=IMAGE:2979184 /UG=Hs.82643 protein tyrosine kinase 9

206113\_s\_at -2.27 gb:NM\_004162.1 /DEF=Homo sapiens RAB5A, member RAS oncogene family (RAB5A), mRNA. /FEA=mRNA /GEN=RAB5A /PROD=RAB5A, member RAS oncogene family /DB\_XREF=gi:4759003 /UG=Hs.73957 RAB5A, member RAS oncogene family /FL=gb:NM\_004162.1 gb:M28215.1

209099\_x\_at -2.28 gb:U73936.1 /DEF=Homo sapiens Jagged 1 (HJ1) mRNA, complete cds. /FEA=mRNA /GEN=HJ1 /PROD=Jagged 1 /DB\_XREF=gi:1695273 /UG=Hs.91143 jagged 1 (Alagille syndrome) /FL=gb:U61276.1 gb:U73936.1 gb:AF003837.1 gb:AF028593.1 gb:NM\_000214.1

215175\_at -2.29 Consensus includes gb:AB023212.1 /DEF=Homo sapiens mRNA for KIAA0995 protein, partial cds. /FEA=mRNA /GEN=KIAA0995 /PROD=KIAA0995 protein /DB\_XREF=gi:4589633 /UG=Hs.225967 KIAA0995 protein

219608\_s\_at -2.3 gb:NM\_024862.1 /DEF=Homo sapiens hypothetical protein FLJ13962 (FLJ13962), mRNA. /FEA=mRNA /GEN=FLJ13962 /PROD=hypothetical protein FLJ13962 /DB\_XREF=gi:13376291 /UG=Hs.330407 hypothetical protein FLJ13962 /FL=gb:NM\_024862.1

214096\_s\_at -2.31 Consensus includes gb:AW190316 /FEA=EST /DB\_XREF=gi:6464796 /DB\_XREF=est:x113g08.x1 /CLONE=IMAGE:2676158 /UG=Hs.2186 eukaryotic translation elongation factor 1 gamma

202956\_at -2.31 gb:NM\_006421.2 /DEF=Homo sapiens brefeldin A-inhibited guanine nucleotide-exchange protein 1 (BIG1), mRNA. /FEA=mRNA /GEN=BIG1 /PROD=brefeldin A-inhibited guaninenucleotide-exchange protein 1 /DB\_XREF=gi:6715588 /UG=Hs.94631 brefeldin A-inhibited guanine nucleotide-exchange protein 1 /FL=gb:AF084520.1 gb:AF111162.1 gb:NM\_006421.2



|             |       |                                                                                                                                                                                                                                                                                                                                                                                        |
|-------------|-------|----------------------------------------------------------------------------------------------------------------------------------------------------------------------------------------------------------------------------------------------------------------------------------------------------------------------------------------------------------------------------------------|
| 203227_s_at | -2.31 | gb:NM_005981.1 /DEF=Homo sapiens sarcoma amplified sequence (SAS), mRNA. /FEA=mRNA /GEN=SAS /PROD=sarcoma amplified sequence /DB_XREF=gi:5174666 /UG=Hs.50984 sarcoma amplified sequence /FL=gb:U01160.1 gb:NM_005981.1                                                                                                                                                                |
| 203895_at   | -2.31 | Consensus includes gb:AL535113 /FEA=EST /DB_XREF=gi:12798606 /DB_XREF=est:AL535113 /CLONE=CS0DF008YC23 (3 prime) /UG=Hs.283006 phospholipase C, beta 4 /FL=gb:NM_000933.1 gb:L41349.1                                                                                                                                                                                                  |
| 214831_at   | -2.31 | Consensus includes gb:AK024944.1 /DEF=Homo sapiens cDNA: FLJ21291 fis, clone COL01963. /FEA=mRNA /DB_XREF=gi:10437366 /UG=Hs.287657 Homo sapiens cDNA: FLJ21291 fis, clone COL01963                                                                                                                                                                                                    |
| 209210_s_at | -2.32 | gb:Z24725.1 /DEF=H.sapiens mitogen inducible gene mig-2, complete CDS. /FEA=mRNA /PROD=mitogen inducible gene mig-2 /DB_XREF=gi:505032 /UG=Hs.75260 mitogen inducible 2 /FL=gb:Z24725.1                                                                                                                                                                                                |
| 219581_at   | -2.32 | gb:NM_025265.1 /DEF=Homo sapiens hypothetical protein MGC2776 (MGC2776), mRNA. /FEA=mRNA /GEN=MGC2776 /PROD=hypothetical protein MGC2776 /DB_XREF=gi:13376881 /UG=Hs.15713 hypothetical protein MGC2776 /FL=gb:BC004178.1 gb:BC004211.1 gb:NM_025265.1                                                                                                                                 |
| 205219_s_at | -2.33 | gb:NM_002044.1 /DEF=Homo sapiens galactokinase 2 (GALK2), mRNA. /FEA=mRNA /GEN=GALK2 /PROD=galactokinase 2 /DB_XREF=gi:4503896 /UG=Hs.129228 galactokinase 2 /FL=gb:BC005141.1 gb:M84443.1 gb:NM_002044.1                                                                                                                                                                              |
| 204672_s_at | -2.33 | gb:NM_014942.1 /DEF=Homo sapiens KIAA0957 protein (KIAA0957), mRNA. /FEA=mRNA /GEN=KIAA0957 /PROD=KIAA0957 protein /DB_XREF=gi:7662405 /UG=Hs.30991 KIAA0957 protein /FL=gb:AB023174.1 gb:NM_014942.1                                                                                                                                                                                  |
| 202342_s_at | -2.33 | gb:NM_015271.1 /DEF=Homo sapiens tripartite motif protein TRIM2 (KIAA0517), mRNA. /FEA=mRNA /GEN=KIAA0517 /PROD=tripartite motif protein TRIM2 /DB_XREF=gi:13446226 /UG=Hs.12372 tripartite motif protein TRIM2 /FL=gb:AF220018.1 gb:NM_015271.1                                                                                                                                       |
| 216942_s_at | -2.33 | Consensus includes gb:D28586.1 /DEF=Human mRNA for LFA-3(delta D2), partial cds. /FEA=mRNA /PROD=LFA-3(delta D2) /DB_XREF=gi:466540 /UG=Hs.75626 CD58 antigen, (lymphocyte function-associated antigen 3)                                                                                                                                                                              |
| 215723_s_at | -2.34 | Consensus includes gb:AJ276230.1 /DEF=Homo sapiens mRNA for partial phospholipase D1, splice variant PLD1ab2. /FEA=mRNA /GEN=PLD1 /PROD=phospholipase D1 /DB_XREF=gi:7161182 /UG=Hs.82587 phospholipase D1, phophatidylcholine-specific                                                                                                                                                |
| 213501_at   | -2.34 | Consensus includes gb:T62985 /FEA=EST /DB_XREF=gi:666642 /DB_XREF=est:yc15d05.s1 /CLONE=IMAGE:80745 /UG=Hs.167835 acyl-Coenzyme A oxidase 1, palmitoyl                                                                                                                                                                                                                                 |
| 207416_s_at | -2.34 | gb:NM_004555.1 /DEF=Homo sapiens nuclear factor of activated T-cells, cytoplasmic, calcineurin-dependent 3 (NFATC3), mRNA. /FEA=mRNA /GEN=NFATC3 /PROD=nuclear factor of activated T-cells,cytoplasmic, calcineurin-dependent 3 /DB_XREF=gi:4758803 /UG=Hs.172674 nuclear factor of activated T-cells, cytoplasmic, calcineurin-dependent 3 /FL=gb:U85428.1 gb:NM_004555.1 gb:L41067.1 |
| 203570_at   | -2.34 | gb:NM_005576.1 /DEF=Homo sapiens lysyl oxidase-like 1 (LOXL1), mRNA. /FEA=mRNA /GEN=LOXL1 /PROD=lysyl oxidase-like 1 /DB_XREF=gi:5031882 /UG=Hs.65436 lysyl oxidase-like 1 /FL=gb:L21186.1 gb:NM_005576.1                                                                                                                                                                              |
| 218877_s_at | -2.35 | gb:NM_021820.1 /DEF=Homo sapiens MDS024 protein (MDS024), mRNA. /FEA=mRNA /GEN=MDS024 /PROD=MDS024 protein /DB_XREF=gi:11141892 /UG=Hs.286122 MDS024 protein /FL=gb:AF182423.1 gb:NM_021820.1                                                                                                                                                                                          |
| 220122_at   | -2.35 | gb:NM_024717.1 /DEF=Homo sapiens hypothetical protein FLJ22344 (FLJ22344), mRNA. /FEA=mRNA /GEN=FLJ22344 /PROD=hypothetical protein FLJ22344 /DB_XREF=gi:13376020 /UG=Hs.107716 hypothetical protein FLJ22344 /FL=gb:NM_024717.1                                                                                                                                                       |
| 220089_at   | -2.35 | gb:NM_024884.1 /DEF=Homo sapiens hypothetical protein FLJ12618 (FLJ12618), mRNA. /FEA=mRNA /GEN=FLJ12618 /PROD=hypothetical protein FLJ12618 /DB_XREF=gi:13376330 /UG=Hs.222021 hypothetical                                                                                                                                                                                           |

|             |       |                                                                                                                                                                                                                                                                                                                                                                          |
|-------------|-------|--------------------------------------------------------------------------------------------------------------------------------------------------------------------------------------------------------------------------------------------------------------------------------------------------------------------------------------------------------------------------|
| 218701_at   | -2.36 | protein FLJ12618 /FL=gb:NM_024884.1<br>gb:NM_016027.1 /DEF=Homo sapiens CGI-83 protein (LOC51110), mRNA. /FEA=mRNA /GEN=LOC51110<br>/PROD=CGI-83 protein /DB_XREF=gi:7705792 /UG=Hs.118554 CGI-83 protein /FL=gb:BC000878.1<br>gb:AF151841.1 gb:NM_016027.1                                                                                                              |
| 218545_at   | -2.37 | gb:NM_018318.1 /DEF=Homo sapiens hypothetical protein FLJ11088 (FLJ11088), mRNA. /FEA=mRNA<br>/GEN=FLJ11088 /PROD=hypothetical protein FLJ11088 /DB_XREF=gi:8922858 /UG=Hs.49282 hypothetical<br>protein FLJ11088 /FL=gb:NM_018318.1                                                                                                                                     |
| 207713_s_at | -2.37 | gb:NM_006462.1 /DEF=Homo sapiens HBV associated factor (XAP4), mRNA. /FEA=mRNA /GEN=XAP4<br>/PROD=HBV associated factor /DB_XREF=gi:5454167 /UG=Hs.247280 HBV associated factor<br>/FL=gb:NM_006462.1                                                                                                                                                                    |
| 202149_at   | -2.37 | Consensus includes gb:AL136139 /DEF=Human DNA sequence from clone RP4-76112 on chromosome 6 Contains<br>3 part of the gene for enhancer of filamentation (HEF1), ESTs, STSs and CpG islands /FEA=mRNA<br>/DB_XREF=gi:8217463 /UG=Hs.80261 enhancer of filamentation 1 (cas-like docking; Crk-associated substrate<br>related) /FL=gb:L43821.1 gb:U64317.1 gb:NM_006403.1 |
| 206101_at   | -2.37 | gb:NM_001393.1 /DEF=Homo sapiens extracellular matrix protein 2, female organ and adipocyte specific (ECM2),<br>mRNA. /FEA=mRNA /GEN=ECM2 /PROD=extracellular matrix protein 2 /DB_XREF=gi:4557542 /UG=Hs.35094<br>extracellular matrix protein 2, female organ and adipocyte specific /FL=gb:AB011792.1 gb:NM_001393.1                                                  |
| 205087_at   | -2.38 | gb:NM_015485.1 /DEF=Homo sapiens DKFZP566K023 protein (DKFZP566K023), mRNA. /FEA=mRNA<br>/GEN=DKFZP566K023 /PROD=DKFZP566K023 protein /DB_XREF=gi:7661655 /UG=Hs.19999 DKFZP566K023<br>protein /FL=gb:NM_015485.1                                                                                                                                                        |
| 204040_at   | -2.39 | gb:NM_014746.1 /DEF=Homo sapiens KIAA0161 gene product (KIAA0161), mRNA. /FEA=mRNA /GEN=KIAA0161<br>/PROD=KIAA0161 gene product /DB_XREF=gi:7661955 /UG=Hs.78894 KIAA0161 gene product /FL=gb:D79983.1<br>gb:NM_014746.1                                                                                                                                                 |
| 210510_s_at | -2.39 | gb:AF145712.1 /DEF=Homo sapiens soluble neuropilin-1 mRNA, complete cds. /FEA=mRNA /PROD=soluble<br>neuropilin-1 /DB_XREF=gi:7271464 /UG=Hs.69285 neuropilin 1 /FL=gb:AF145712.1                                                                                                                                                                                         |
| 220072_at   | -2.39 | gb:NM_024790.1 /DEF=Homo sapiens hypothetical protein FLJ22490 (FLJ22490), mRNA. /FEA=mRNA<br>/GEN=FLJ22490 /PROD=hypothetical protein FLJ22490 /DB_XREF=gi:13376157 /UG=Hs.153746 hypothetical<br>protein FLJ22490 /FL=gb:NM_024790.1                                                                                                                                   |
| 218197_s_at | -2.39 | gb:NM_018002.1 /DEF=Homo sapiens oxidation resistance 1 (OXR1), mRNA. /FEA=mRNA /GEN=OXR1<br>/PROD=oxidation resistance 1 /DB_XREF=gi:8922240 /UG=Hs.169111 oxidation resistance 1<br>/FL=gb:NM_018002.1                                                                                                                                                                 |
| 219109_at   | -2.4  | gb:NM_024532.1 /DEF=Homo sapiens hypothetical protein FLJ22724 (FLJ22724), mRNA. /FEA=mRNA<br>/GEN=FLJ22724 /PROD=hypothetical protein FLJ22724 /DB_XREF=gi:13375683 /UG=Hs.6783 hypothetical<br>protein FLJ22724 /FL=gb:NM_024532.1                                                                                                                                     |
| 216411_s_at | -2.4  | Consensus includes gb:AK023699.1 /DEF=Homo sapiens cDNA FLJ13637 fis, clone PLACE1011165.<br>/FEA=mRNA /DB_XREF=gi:10435704 /UG=Hs.287584 Homo sapiens cDNA FLJ13637 fis, clone PLACE1011165                                                                                                                                                                             |
| 213419_at   | -2.41 | Consensus includes gb:U62325.1 /DEF=Human FE65-like protein (hFE65L) mRNA, partial cds. /FEA=mRNA<br>/GEN=hFE65L /PROD=FE65-like protein /DB_XREF=gi:1657751 /UG=Hs.324125 amyloid beta (A4) precursor<br>protein-binding, family B, member 2 (Fe65-like)                                                                                                                |
| 212338_at   | -2.41 | Consensus includes gb:AA621962 /FEA=EST /DB_XREF=gi:2525838 /DB_XREF=est:nq24b02.s1<br>/CLONE=IMAGE:1144779 /UG=Hs.39871 KIAA0727 protein                                                                                                                                                                                                                                |
| 212870_at   | -2.41 | Consensus includes gb:AI628605 /FEA=EST /DB_XREF=gi:4665405 /DB_XREF=est:ty77a08.x1<br>/CLONE=IMAGE:2285078 /UG=Hs.326392 son of sevenless (Drosophila) homolog 1 /FL=gb:L13858.1                                                                                                                                                                                        |

|             |       |                                                                                                                                                                                                                                                                                                                          |
|-------------|-------|--------------------------------------------------------------------------------------------------------------------------------------------------------------------------------------------------------------------------------------------------------------------------------------------------------------------------|
| 213839_at   | -2.41 | gb:NM_005633.1<br>Consensus includes gb:AW028110 /FEA=EST /DB_XREF=gi:5886866 /DB_XREF=est:wv26a10.x1 /CLONE=IMAGE:2530650 /UG=Hs.301478 KIAA0500 protein                                                                                                                                                                |
| 219280_at   | -2.41 | gb:NM_018963.1 /DEF=Homo sapiens WD repeat domain 9 (WDR9), mRNA. /FEA=mRNA /GEN=WDR9 /PROD=WD repeat domain 9 /DB_XREF=gi:11321643 /UG=Hs.225674 WD repeat domain 9 /FL=gb:NM_018963.1                                                                                                                                  |
| 221730_at   | -2.41 | Consensus includes gb:NM_000393.1 /DEF=Homo sapiens collagen, type V, alpha 2 (COL5A2), mRNA. /FEA=CDS /GEN=COL5A2 /PROD=collagen, type V, alpha 2 /DB_XREF=gi:4502958 /UG=Hs.82985 collagen, type V, alpha 2 /FL=gb:NM_000393.1                                                                                         |
| 209189_at   | -2.43 | gb:BC004490.1 /DEF=Homo sapiens, v-fos FBJ murine osteosarcoma viral oncogene homolog, clone MGC:11074, mRNA, complete cds. /FEA=mRNA /PROD=v-fos FBJ murine osteosarcoma viral oncogene homolog /DB_XREF=gi:13325363 /UG=Hs.25647 v-fos FBJ murine osteosarcoma viral oncogene homolog /FL=gb:BC004490.1 gb:NM_005252.2 |
| 203513_at   | -2.43 | gb:NM_025137.1 /DEF=Homo sapiens hypothetical protein FLJ21439 (FLJ21439), mRNA. /FEA=mRNA /GEN=FLJ21439 /PROD=hypothetical protein FLJ21439 /DB_XREF=gi:13376718 /UG=Hs.288872 hypothetical protein FLJ21439 /FL=gb:NM_025137.1                                                                                         |
| 221824_s_at | -2.43 | Consensus includes gb:AA770170 /FEA=EST /DB_XREF=gi:2821408 /DB_XREF=est:ah84d09.s1 /CLONE=1322321 /UG=Hs.288156 Homo sapiens cDNA: FLJ21819 fis, clone HEP01185                                                                                                                                                         |
| 203780_at   | -2.44 | gb:AF275945.1 /DEF=Homo sapiens epithelial V-like antigen 1 (EVA1) mRNA, complete cds. /FEA=mRNA /GEN=EVA1 /PROD=epithelial V-like antigen 1 /DB_XREF=gi:9392652 /UG=Hs.116651 epithelial V-like antigen 1 /FL=gb:AF304447.1 gb:AF030455.1 gb:NM_005797.1 gb:AF275945.1                                                  |
| 220945_x_at | -2.44 | gb:NM_018050.1 /DEF=Homo sapiens hypothetical protein FLJ10298 (FLJ10298), mRNA. /FEA=mRNA /GEN=FLJ10298 /PROD=hypothetical protein FLJ10298 /DB_XREF=gi:8922334 /UG=Hs.5999 hypothetical protein FLJ10298 /FL=gb:NM_018050.1                                                                                            |
| 207219_at   | -2.44 | gb:NM_023070.1 /DEF=Homo sapiens hypothetical protein (LOC65243), mRNA. /FEA=mRNA /GEN=LOC65243 /PROD=hypothetical protein /DB_XREF=gi:12751478 /UG=Hs.133034 hypothetical protein /FL=gb:NM_023070.1                                                                                                                    |
| 217627_at   | -2.45 | Consensus includes gb:BE515346 /FEA=EST /DB_XREF=gi:9722561 /DB_XREF=est:601235986F1 /CLONE=IMAGE:3608205 /UG=Hs.278871 ESTs, Weakly similar to S4702 finger protein HZF10, Krueppel-related H.sapiens                                                                                                                   |
| 61732_r_at  | -2.46 | Cluster Incl. Al610355:tp18g08.x1 Homo sapiens cDNA, 3' end /clone=IMAGE-2188190 /clone_end=3 /gb=Al610355 /gi=4619522 /ug=Hs.39328 /len=463                                                                                                                                                                             |
| 209457_at   | -2.46 | gb:U16996.1 /DEF=Human protein tyrosine phosphatase mRNA, complete cds. /FEA=mRNA /PROD=protein tyrosine phosphatase /DB_XREF=gi:642012 /UG=Hs.2128 dual specificity phosphatase 5 /FL=gb:NM_004419.2 gb:U16996.1 gb:U15932.2                                                                                            |
| 213308_at   | -2.46 | Consensus includes gb:BF435773 /FEA=EST /DB_XREF=gi:11448088 /DB_XREF=est:nab41f03.x1 /CLONE=IMAGE:3268373 /UG=Hs.12696 cortactin SH3 domain-binding protein                                                                                                                                                             |
| 220176_at   | -2.46 | gb:NM_025152.1 /DEF=Homo sapiens hypothetical protein FLJ12660 (FLJ12660), mRNA. /FEA=mRNA /GEN=FLJ12660 /PROD=hypothetical protein FLJ12660 /DB_XREF=gi:13376746 /UG=Hs.288981 hypothetical protein FLJ12660 /FL=gb:NM_025152.1                                                                                         |
| 205594_at   | -2.46 | gb:NM_014897.1 /DEF=Homo sapiens KIAA0924 protein (KIAA0924), mRNA. /FEA=mRNA /GEN=KIAA0924 /PROD=KIAA0924 protein /DB_XREF=gi:7662383 /UG=Hs.190386 KIAA0924 protein /FL=gb:AB023141.1 gb:NM_014897.1                                                                                                                   |
| 215022_x_at | -2.47 | Consensus includes gb:BG429214 /FEA=EST /DB_XREF=gi:13335720 /DB_XREF=est:602498083F1 /CLONE=IMAGE:4611836 /UG=Hs.258144 zinc finger protein 33b (KOX 31)                                                                                                                                                                |

|             |       |                                                                                                                                                                                                                                                                                                                                                                                                                 |
|-------------|-------|-----------------------------------------------------------------------------------------------------------------------------------------------------------------------------------------------------------------------------------------------------------------------------------------------------------------------------------------------------------------------------------------------------------------|
| 215610_at   | -2.48 | Consensus includes gb:AK022038.1 /DEF=Homo sapiens cDNA FLJ11976 fis, clone HEMBB1001253. /FEA=mRNA /DB_XREF=gi:10433356 /UG=Hs.296679 Homo sapiens cDNA FLJ11976 fis, clone HEMBB1001253                                                                                                                                                                                                                       |
| 218043_s_at | -2.48 | gb:NM_022461.1 /DEF=Homo sapiens hypothetical protein FLJ21939 similar to 5-azacytidine induced gene 2 (FLJ21939), mRNA. /FEA=mRNA /GEN=FLJ21939 /PROD=hypothetical protein FLJ21939 similar to 5-azacytidine induced gene 2 /DB_XREF=gi:11968002 /UG=Hs.164478 hypothetical protein FLJ21939 similar to 5-azacytidine induced gene 2 /FL=gb:NM_022461.1                                                        |
| 209551_at   | -2.48 | gb:BC004875.1 /DEF=Homo sapiens, Similar to RIKEN cDNA 2310034L04 gene, clone MGC:11061, mRNA, complete cds. /FEA=mRNA /PROD=Similar to RIKEN cDNA 2310034L04 gene /DB_XREF=gi:13436109 /UG=Hs.66309 Homo sapiens, Similar to RIKEN cDNA 2310034L04 gene, clone MGC:11061, mRNA, complete cds /FL=gb:BC004875.1                                                                                                 |
| 213212_x_at | -2.48 | Consensus includes gb:AI632181 /FEA=EST /DB_XREF=gi:4683511 /DB_XREF=est:ts85h05.x1 /CLONE=IMAGE:2238105 /UG=Hs.182982 golgin-67                                                                                                                                                                                                                                                                                |
| 206506_s_at | -2.48 | gb:NM_003599.1 /DEF=Homo sapiens suppressor of Ty (S.cerevisiae) 3 homolog (SUPT3H), mRNA. /FEA=mRNA /GEN=SUPT3H /PROD=suppressor of Ty (S.cerevisiae) 3 homolog /DB_XREF=gi:4507308 /UG=Hs.96757 suppressor of Ty (S.cerevisiae) 3 homolog /FL=gb:AF073930.1 gb:AF069734.1 gb:NM_003599.1                                                                                                                      |
| 204671_s_at | -2.48 | Consensus includes gb:BE677131 /FEA=EST /DB_XREF=gi:10037672 /DB_XREF=est:7d80g06.x1 /CLONE=IMAGE:3279322 /UG=Hs.30991 KIAA0957 protein /FL=gb:AB023174.1 gb:NM_014942.1                                                                                                                                                                                                                                        |
| 205042_at   | -2.48 | gb:NM_005476.2 /DEF=Homo sapiens UDP-N-acetylglucosamine-2-epimeraseN-acetylmannosamine kinase (GNE), mRNA. /FEA=mRNA /GEN=GNE /PROD=UDP-N-acetylglucosamine-2-epimeraseN-acetylmannosamine kinase /DB_XREF=gi:6382074 /UG=Hs.5920 UDP-N-acetylglucosamine-2-epimeraseN-acetylmannosamine kinase /FL=gb:AF051852.1 gb:AF155663.1 gb:NM_005476.2                                                                 |
| 217915_s_at | -2.49 | gb:NM_016304.1 /DEF=Homo sapiens 60S ribosomal protein L30 isolog (LOC51187), mRNA. /FEA=mRNA /GEN=LOC51187 /PROD=60S ribosomal protein L30 isolog /DB_XREF=gi:10047101 /UG=Hs.284162 60S ribosomal protein L30 isolog /FL=gb:NM_016304.1 gb:AF060926.1 gb:AF212226.1 gb:BC005344.1 gb:AF201949.1 gb:AF165521.1                                                                                                 |
| 204554_at   | -2.49 | Consensus includes gb:AL109928 /DEF=Human DNA sequence from clone RP4-551D2 on chromosome 20q13.2-13.33. Contains the gene for a novel Cadherin domain protein, a novel gene, the PPP1R6 gene for protein phosphatase 1 regulatory subunit 6, the 5 end of the SYCP2 gene for synaptonemal... /FEA=mRNA_6 /DB_XREF=gi:7981303 /UG=Hs.42215 protein phosphatase 1, regulatory subunit 6 /FL=gb:NM_006242.2       |
| 204205_at   | -2.49 | gb:NM_021822.1 /DEF=Homo sapiens phorbolin-like protein MDS019 (MDS019), mRNA. /FEA=mRNA /GEN=MDS019 /PROD=phorbolin-like protein MDS019 /DB_XREF=gi:13399303 /UG=Hs.250619 phorbolin-like protein MDS019 /FL=gb:AF182420.1 gb:NM_021822.1                                                                                                                                                                      |
| 215163_at   | -2.5  | Consensus includes gb:AK022211.1 /DEF=Homo sapiens cDNA FLJ12149 fis, clone MAMMA1000421. /FEA=mRNA /DB_XREF=gi:10433557 /UG=Hs.203349 Homo sapiens cDNA FLJ12149 fis, clone MAMMA1000421                                                                                                                                                                                                                       |
| 206667_s_at | -2.5  | gb:AF005037.1 /DEF=Homo sapiens secretory carrier membrane protein (SCAMP1) mRNA, complete cds. /FEA=mRNA /GEN=SCAMP1 /PROD=secretory carrier membrane protein /DB_XREF=gi:2232238 /UG=Hs.31218 secretory carrier membrane protein 1 /FL=gb:AF005037.1 gb:AF038966.1 gb:NM_004866.1                                                                                                                             |
| 203186_s_at | -2.5  | gb:NM_002961.2 /DEF=Homo sapiens S100 calcium-binding protein A4 (calcium protein, calvasculin, metastasin, murine placental homolog) (S100A4), transcript variant 1, mRNA. /FEA=mRNA /GEN=S100A4 /PROD=S100 calcium-binding protein A4 /DB_XREF=gi:9845514 /UG=Hs.81256 S100 calcium-binding protein A4 (calcium protein, calvasculin, metastasin, murine placental homolog) /FL=gb:NM_002961.2 gb:NM_019554.1 |
| 216470_x_at | -2.5  | Consensus includes gb:AF009664 /DEF=Homo sapiens T cell receptor beta locus, 3 trypsinogen repeats /FEA=CDS_1 /DB_XREF=gi:2275594 /UG=Hs.303157 T cell receptor beta locus                                                                                                                                                                                                                                      |

|             |       |                                                                                                                                                                                                                                                                                                                                                                                                                                      |
|-------------|-------|--------------------------------------------------------------------------------------------------------------------------------------------------------------------------------------------------------------------------------------------------------------------------------------------------------------------------------------------------------------------------------------------------------------------------------------|
| 205280_at   | -2.51 | gb:NM_000824.1 /DEF=Homo sapiens glycine receptor, beta (GLRB), mRNA. /FEA=mRNA /GEN=GLRB /PROD=glycine receptor, beta /DB_XREF=gi:4504022 /UG=Hs.32973 glycine receptor, beta /FL=gb:AF094754.1 gb:NM_000824.1 gb:U33267.1                                                                                                                                                                                                          |
| 202538_s_at | -2.51 | gb:NM_014043.1 /DEF=Homo sapiens DKFZP564O123 protein (DKFZP564O123), mRNA. /FEA=mRNA /GEN=DKFZP564O123 /PROD=DKFZP564O123 protein /DB_XREF=gi:7661633 /UG=Hs.11449 DKFZP564O123 protein /FL=gb:AF151842.1 gb:AL080122.1 gb:NM_014043.1                                                                                                                                                                                              |
| 207836_s_at | -2.53 | gb:NM_006867.1 /DEF=Homo sapiens RNA-binding protein gene with multiple splicing (RBPMS), mRNA. /FEA=mRNA /GEN=RBPMS /PROD=RNA-binding protein gene with multiple splicing /DB_XREF=gi:5803140 /UG=Hs.80248 RNA-binding protein gene with multiple splicing /FL=gb:D84110.1 gb:NM_006867.1                                                                                                                                           |
| 203917_at   | -2.53 | gb:NM_001338.1 /DEF=Homo sapiens coxsackie virus and adenovirus receptor (CXADR), mRNA. /FEA=mRNA /GEN=CXADR /PROD=coxsackie virus and adenovirus receptor /DB_XREF=gi:4503172 /UG=Hs.79187 coxsackie virus and adenovirus receptor /FL=gb:BC003684.1 gb:U90716.1 gb:NM_001338.1                                                                                                                                                     |
| 221986_s_at | -2.53 | Consensus includes gb:AW006750 /FEA=EST /DB_XREF=gi:5855528 /DB_XREF=est:wr28h09.x1 /CLONE=IMAGE:2489057 /UG=Hs.246875 hypothetical protein FLJ20059                                                                                                                                                                                                                                                                                 |
| 218176_at   | -2.53 | gb:NM_022149.1 /DEF=Homo sapiens MAGEF1 protein (MAGEF1), mRNA. /FEA=mRNA /GEN=MAGEF1 /PROD=MAGEF1 protein /DB_XREF=gi:11545891 /UG=Hs.306123 MAGEF1 protein /FL=gb:AF295378.1 gb:NM_022149.1                                                                                                                                                                                                                                        |
| 218919_at   | -2.54 | gb:NM_024699.1 /DEF=Homo sapiens hypothetical protein FLJ14007 (FLJ14007), mRNA. /FEA=mRNA /GEN=FLJ14007 /PROD=hypothetical protein FLJ14007 /DB_XREF=gi:13375984 /UG=Hs.99519 hypothetical protein FLJ14007 /FL=gb:NM_024699.1                                                                                                                                                                                                      |
| 211555_s_at | -2.54 | gb:AF020340.1 /DEF=Homo sapiens soluble guanylate cyclase beta-1 subunit (GC-S-beta-1) mRNA, alternatively spliced, complete cds. /FEA=mRNA /GEN=GC-S-beta-1 /PROD=soluble guanylate cyclase beta-1 subunit /DB_XREF=gi:2746082 /UG=Hs.77890 guanylate cyclase 1, soluble, beta 3 /FL=gb:AF020340.1                                                                                                                                  |
| 222148_s_at | -2.54 | Consensus includes gb:BF688108 /FEA=EST /DB_XREF=gi:11973516 /DB_XREF=est:602067332F1 /CLONE=IMAGE:4066422 /UG=Hs.14202 hypothetical protein FLJ11040                                                                                                                                                                                                                                                                                |
| 213376_at   | -2.54 | Consensus includes gb:AI656706 /FEA=EST /DB_XREF=gi:4740685 /DB_XREF=est:tt53e01.x1 /CLONE=IMAGE:2244504 /UG=Hs.24083 KIAA0997 protein                                                                                                                                                                                                                                                                                               |
| 201811_x_at | -2.54 | gb:NM_004844.1 /DEF=Homo sapiens SH3-domain binding protein 5 (BTK-associated) (SH3BP5), mRNA. /FEA=mRNA /GEN=SH3BP5 /PROD=SH3-domain binding protein 5 (BTK-associated) /DB_XREF=gi:4759057 /UG=Hs.109150 SH3-domain binding protein 5 (BTK-associated) /FL=gb:AB005047.1 gb:NM_004844.1                                                                                                                                            |
| 218035_s_at | -2.55 | gb:NM_019027.1 /DEF=Homo sapiens hypothetical protein (FLJ20273), mRNA. /FEA=mRNA /GEN=FLJ20273 /PROD=hypothetical protein /DB_XREF=gi:9506670 /UG=Hs.95549 hypothetical protein /FL=gb:NM_019027.1                                                                                                                                                                                                                                  |
| 210480_s_at | -2.55 | gb:U90236.2 /DEF=Homo sapiens myosin VI (MYO6) mRNA, complete cds. /FEA=mRNA /GEN=MYO6 /PROD=myosin VI /DB_XREF=gi:9280815 /UG=Hs.22564 myosin VI /FL=gb:U90236.2                                                                                                                                                                                                                                                                    |
| 203408_s_at | -2.55 | gb:NM_002971.1 /DEF=Homo sapiens special AT-rich sequence binding protein 1 (binds to nuclear matrixscaffold-associating DNAs) (SATB1), mRNA. /FEA=mRNA /GEN=SATB1 /PROD=special AT-rich sequence binding protein 1 (binds to nuclear matrixscaffold-associating DNAs) /DB_XREF=gi:4506790 /UG=Hs.74592 special AT-rich sequence binding protein 1 (binds to nuclear matrixscaffold-associating DNAs) /FL=gb:M97287.1 gb:NM_002971.1 |
| 215707_s_at | -2.55 | Consensus includes gb:AV725328 /FEA=EST /DB_XREF=gi:10830606 /DB_XREF=est:AV725328 /CLONE=HTCAVD03 /UG=Hs.74621 prion protein (p27-30) (Creutzfeld-Jakob disease, Gerstmann-Strausler-Scheinker syndrome, fatal familial insomnia)                                                                                                                                                                                                   |
| 204068_at   | -2.55 | gb:NM_006281.1 /DEF=Homo sapiens serinethreonine kinase 3 (Ste20, yeast homolog) (STK3), mRNA. /FEA=mRNA /GEN=STK3 /PROD=serinethreonine kinase 3 (Ste20, yeasthomolog) /DB_XREF=gi:5454093                                                                                                                                                                                                                                          |

|             |       |                                                                                                                                                                                                                                                                                                                                                                                                                                                |
|-------------|-------|------------------------------------------------------------------------------------------------------------------------------------------------------------------------------------------------------------------------------------------------------------------------------------------------------------------------------------------------------------------------------------------------------------------------------------------------|
| 203988_s_at | -2.55 | /UG=Hs.166684 serinethreonine kinase 3 (Ste20, yeast homolog) /FL=gb:U26424.1 gb:U60206.1 gb:NM_006281.1 gb:NM_004480.1 /DEF=Homo sapiens fucosyltransferase 8 (alpha (1,6) fucosyltransferase) (FUT8), mRNA. /FEA=mRNA /GEN=FUT8 /PROD=fucosyltransferase 8 (alpha (1,6)fucosyltransferase) /DB_XREF=gi:4758407                                                                                                                               |
| 222266_at   | -2.55 | /UG=Hs.118722 fucosyltransferase 8 (alpha (1,6) fucosyltransferase) /FL=gb:D89289.1 gb:NM_004480.1 Consensus includes gb:BF796940 /FEA=EST /DB_XREF=gi:12101994 /DB_XREF=est:602258153F1 /CLONE=IMAGE:4341588 /UG=Hs.294100 ESTs                                                                                                                                                                                                               |
| 203608_at   | -2.56 | Consensus includes gb:AL031230 /DEF=Human DNA sequence from clone 73M23 on chromosome 6p22.2-22.3. Contains the 5 part of the possibly alternatively spliced gene for Phosphatidylinositol-glycan-specific Phospholipase D 1 precursor (EC 3.1.4.50, PIGPLD1, Glycoprotein Phospholipase D... /FEA=mRNA_5 /DB_XREF=gi:3947845 /UG=Hs.5299 aldehyde dehydrogenase 5 family, member A1 (succinate-semialdehyde dehydrogenase) /FL=gb:NM_001080.1 |
| 211937_at   | -2.56 | Consensus includes gb:NM_001417.1 /DEF=Homo sapiens eukaryotic translation initiation factor 4B (EIF4B), mRNA. /FEA=CDS /GEN=EIF4B /PROD=eukaryotic translation initiation factor 4B /DB_XREF=gi:4503532 /UG=Hs.93379 eukaryotic translation initiation factor 4B /FL=gb:NM_001417.1                                                                                                                                                           |
| 212633_at   | -2.56 | Consensus includes gb:AL132776 /DEF=Human DNA sequence from clone RP3-393D12 on chromosome 6q16.1-16.3. Contains the 3 end of the gene KIAA0776, the gene for a novel LIM domain protein, ESTs, STSs and GSSs /FEA=mRNA_2 /DB_XREF=gi:6706246 /UG=Hs.5460 KIAA0776 protein                                                                                                                                                                     |
| 220169_at   | -2.56 | gb:NM_024943.1 /DEF=Homo sapiens hypothetical protein FLJ23235 (FLJ23235), mRNA. /FEA=mRNA /GEN=FLJ23235 /PROD=hypothetical protein FLJ23235 /DB_XREF=gi:13376422 /UG=Hs.283578 hypothetical protein FLJ23235 /FL=gb:NM_024943.1                                                                                                                                                                                                               |
| 221085_at   | -2.56 | gb:NM_005118.1 /DEF=Homo sapiens tumor necrosis factor (ligand) superfamily, member 15 (TNFSF15), mRNA. /FEA=mRNA /GEN=TNFSF15 /PROD=tumor necrosis factor (ligand) superfamily,member 15 /DB_XREF=gi:4827031 /UG=Hs.241382 tumor necrosis factor (ligand) superfamily, member 15 /FL=gb:NM_005118.1                                                                                                                                           |
| 203989_x_at | -2.57 | gb:NM_001992.2 /DEF=Homo sapiens coagulation factor II (thrombin) receptor (F2R), mRNA. /FEA=mRNA /GEN=F2R /PROD=coagulation factor II receptor precursor /DB_XREF=gi:6031164 /UG=Hs.128087 coagulation factor II (thrombin) receptor /FL=gb:BC002464.1 gb:M62424.1 gb:NM_001992.2                                                                                                                                                             |
| 211277_x_at | -2.57 | gb:BC004369.1 /DEF=Homo sapiens, Similar to amyloid beta (A4) precursor protein (protease nexin-II, Alzheimer disease), clone MGC:10403, mRNA, complete cds. /FEA=mRNA /PROD=Similar to amyloid beta (A4) precursor protein(protease nexin-II, Alzheimer disease) /DB_XREF=gi:13325111 /UG=Hs.177486 amyloid beta (A4) precursor protein (protease nexin-II, Alzheimer disease) /FL=gb:BC004369.1                                              |
| 218645_at   | -2.58 | gb:NM_021994.1 /DEF=Homo sapiens zinc finger protein 277 (ZNF277), mRNA. /FEA=mRNA /GEN=ZNF277 /PROD=zinc finger protein 277 /DB_XREF=gi:11496268 /UG=Hs.42636 zinc finger protein 277 /FL=gb:NM_021994.1 gb:AF209198.1                                                                                                                                                                                                                        |
| 215785_s_at | -2.58 | Consensus includes gb:AL161999.1 /DEF=Homo sapiens mRNA; cDNA DKFZp761H087 (from clone DKFZp761H087); partial cds. /FEA=mRNA /GEN=DKFZp761H087 /PROD=hypothetical protein /DB_XREF=gi:7328000 /UG=Hs.258503 p53 inducible protein                                                                                                                                                                                                              |
| 214182_at   | -2.58 | Consensus includes gb:AA243143 /FEA=EST /DB_XREF=gi:1874138 /DB_XREF=est:zs13h04.s1 /CLONE=IMAGE:685111 /UG=Hs.89474 ADP-ribosylation factor 6                                                                                                                                                                                                                                                                                                 |
| 209212_s_at | -2.58 | gb:AB030824.1 /DEF=Homo sapiens mRNA for transcription factor BTEB2, complete cds. /FEA=mRNA /GEN=bteb2 /PROD=transcription factor BTEB2 /DB_XREF=gi:8272417 /UG=Hs.84728 Kruppel-like factor 5 (intestinal) /FL=gb:D14520.1 gb:NM_001730.1 gb:AF132818.1 gb:AB030824.1 gb:AF287272.1                                                                                                                                                          |
| 215294_s_at | -2.58 | Consensus includes gb:AK026426.1 /DEF=Homo sapiens cDNA: FLJ22773 fis, clone KAIA1473, highly similar to                                                                                                                                                                                                                                                                                                                                       |

HUMSNF2L Human global transcription activator homologous sequence mRNA. /FEA=mRNA /DB\_XREF=gi:10439287 /UG=Hs.152292 SWISNF related, matrix associated, actin dependent regulator of chromatin, subfamily a, member 1

218311\_at -2.58 gb:NM\_003618.1 /DEF=Homo sapiens mitogen-activated protein kinase kinase kinase 3 (MAP4K3), mRNA. /FEA=mRNA /GEN=MAP4K3 /PROD=mitogen-activated protein kinase kinase kinase 3 /DB\_XREF=gi:4506376 /UG=Hs.227400 mitogen-activated protein kinase kinase kinase 3 /FL=gb:AF000145.1 gb:NM\_003618.1

209625\_at -2.59 gb:BC004100.1 /DEF=Homo sapiens, phosphatidylinositol glycan, class H, clone MGC:10360, mRNA, complete cds. /FEA=mRNA /PROD=phosphatidylinositol glycan, class H /DB\_XREF=gi:13278629 /UG=Hs.177 phosphatidylinositol glycan, class H /FL=gb:BC004100.1 gb:L19783.1 gb:NM\_004569.1

212299\_at -2.59 Consensus includes gb:AL117502.1 /DEF=Homo sapiens mRNA; cDNA DKFZp434D0935 (from clone DKFZp434D0935). /FEA=mRNA /DB\_XREF=gi:5912009 /UG=Hs.7200 Homo sapiens mRNA; cDNA DKFZp434D0935 (from clone DKFZp434D0935)

212593\_s\_at -2.61 Consensus includes gb:N92498 /FEA=EST /DB\_XREF=gi:1264807 /DB\_XREF=est:zb28a04.s1 /CLONE=IMAGE:304878 /UG=Hs.326248 Homo sapiens cDNA: FLJ22071 fis, clone HEP11691

215395\_x\_at -2.61 Consensus includes gb:U66061 /DEF=Human germline T-cell receptor beta chain TCRBV17S1A1T, TCRBV2S1, TCRBV10S1P, TCRBV29S1P, TCRBV19S1P, TCRBV15S1, TCRBV11S1A1T, HVB relic, TCRBV28S1P, TCRBV34S1, TCRBV14S1, TCRBV3S1, TCRBV4S1A1T, TRY4, TRY5, TRY6, TRY7, TRY8, TCRBD1, TCRBJ1S1, TCRB... /FEA=CDS\_1 /DB\_XREF=gi:1552511 /UG=Hs.302180 Human germline T-cell receptor beta chain TCRBV17S1A1T, TCRBV2S1, TCRBV10S1P, TCRBV29S1P, TCRBV19S1P, TCRBV15S1, TCRBV11S1A1T, HVB relic, TCRBV28S1P, TCRBV34S1, TCRBV14S1, TCRBV3S1, TCRBV4S1A1T, TRY4, TRY5, TRY6, TRY7, TRY8, TCRBD1, TCRBJ1S1, TCRBJ1S2, TC

221268\_s\_at -2.61 gb:NM\_030791.1 /DEF=Homo sapiens sphingosine-1-phosphatase (LOC81537), mRNA. /FEA=mRNA /GEN=LOC81537 /PROD=sphingosine-1-phosphatase /DB\_XREF=gi:13540568 /FL=gb:NM\_030791.1

211760\_s\_at -2.62 gb:BC005974.1 /DEF=Homo sapiens, vesicle-associated membrane protein 4, clone MGC:14658, mRNA, complete cds. /FEA=mRNA /PROD=vesicle-associated membrane protein 4 /DB\_XREF=gi:13543647 /FL=gb:BC005974.1

203265\_s\_at -2.62 Consensus includes gb:AA810268 /FEA=EST /DB\_XREF=gi:2879627 /DB\_XREF=est:od14f07.s1 /CLONE=IMAGE:1367941 /UG=Hs.75217 mitogen-activated protein kinase kinase 4 /FL=gb:NM\_003010.1 gb:L36870.1 gb:U17743.1

218665\_at -2.62 gb:NM\_012193.1 /DEF=Homo sapiens frizzled (Drosophila) homolog 4 (FZD4), mRNA. /FEA=mRNA /GEN=FZD4 /PROD=frizzled (Drosophila) homolog 4 /DB\_XREF=gi:6912383 /UG=Hs.19545 frizzled (Drosophila) homolog 4 /FL=gb:AB032417.1 gb:NM\_012193.1

206417\_at -2.65 gb:NM\_000087.1 /DEF=Homo sapiens cyclic nucleotide gated channel alpha 1 (CNGA1), mRNA. /FEA=mRNA /GEN=CNGA1 /PROD=cyclic nucleotide gated channel alpha 1 /DB\_XREF=gi:4502914 /UG=Hs.1323 cyclic nucleotide gated channel alpha 1 /FL=gb:M84741.1 gb:NM\_000087.1

213704\_at -2.66 Consensus includes gb:AA129753 /FEA=EST /DB\_XREF=gi:1690163 /DB\_XREF=est:zl16a12.s1 /CLONE=IMAGE:502078 /UG=Hs.78948 Rab geranylgeranyltransferase, beta subunit

204351\_at -2.67 gb:NM\_005980.1 /DEF=Homo sapiens S100 calcium-binding protein P (S100P), mRNA. /FEA=mRNA /GEN=S100P /PROD=S100 calcium-binding protein P /DB\_XREF=gi:5174662 /UG=Hs.2962 S100 calcium-binding protein P /FL=gb:NM\_005980.1

205402\_x\_at -2.68 gb:NM\_002770.1 /DEF=Homo sapiens protease, serine, 2 (trypsin 2) (PRSS2), mRNA. /FEA=mRNA /GEN=PRSS2 /PROD=protease, serine, 2 (trypsin 2) /DB\_XREF=gi:4506146 /UG=Hs.241561 protease, serine, 2 (trypsin 2) /FL=gb:NM\_002770.1 gb:M27602.1

|             |       |                                                                                                                                                                                                                                                                                                                                                |
|-------------|-------|------------------------------------------------------------------------------------------------------------------------------------------------------------------------------------------------------------------------------------------------------------------------------------------------------------------------------------------------|
| 65517_at    | -2.68 | Cluster Incl. AA910946:ok85g06.s1 Homo sapiens cDNA, 3 end /clone=IMAGE-1520794 /clone_end=3 /gb=AA910946 /gi=3050236 /ug=Hs.18894 /len=982                                                                                                                                                                                                    |
| 213672_at   | -2.7  | Consensus includes gb:AA621558 /FEA=EST /DB_XREF=gi:2525497 /DB_XREF=est:af53a09.s1 /CLONE=IMAGE:1035352 /UG=Hs.279946 methionine-tRNA synthetase                                                                                                                                                                                              |
| 210802_s_at | -2.7  | gb:BC002841.1 /DEF=Homo sapiens, Similar to putative dimethyladenosine transferase, clone MGC:3382, mRNA, complete cds. /FEA=mRNA /PROD=Similar to putative dimethyladenosinetransferase /DB_XREF=gi:12803982 /UG=Hs.125819 putative dimethyladenosine transferase /FL=gb:BC002841.1                                                           |
| 219270_at   | -2.71 | gb:NM_024111.1 /DEF=Homo sapiens hypothetical protein MGC4504 (MGC4504), mRNA. /FEA=mRNA /GEN=MGC4504 /PROD=hypothetical protein MGC4504 /DB_XREF=gi:13129125 /UG=Hs.155569 hypothetical protein MGC4504 /FL=gb:BC001847.1 gb:NM_024111.1                                                                                                      |
| 206354_at   | -2.71 | gb:NM_019844.1 /DEF=Homo sapiens solute carrier family 21 (organic anion transporter), member 8 (SLC21A8), mRNA. /FEA=mRNA /GEN=SLC21A8 /PROD=solute carrier family 21 (organic anion transporter), member 8 /DB_XREF=gi:9790232 /UG=Hs.274981 solute carrier family 21 (organic anion transporter), member 8 /FL=gb:AF187815.1 gb:NM_019844.1 |
| 213421_x_at | -2.71 | Consensus includes gb:AW007273 /FEA=EST /DB_XREF=gi:5856051 /DB_XREF=est:wt54d10.x1 /CLONE=IMAGE:2511283 /UG=Hs.58247 protease, serine, 4 (trypsin 4, brain)                                                                                                                                                                                   |
| 219429_at   | -2.72 | gb:NM_024306.1 /DEF=Homo sapiens fatty acid hydroxylase (FAAH), mRNA. /FEA=mRNA /GEN=FAAH /PROD=fatty acid hydroxylase /DB_XREF=gi:13236537 /UG=Hs.249163 fatty acid hydroxylase /FL=gb:BC002679.1 gb:NM_024306.1 gb:BC004263.1                                                                                                                |
| 217564_s_at | -2.72 | Consensus includes gb:W80357 /FEA=EST /DB_XREF=gi:1391394 /DB_XREF=est:zh49a06.s1 /CLONE=IMAGE:415378 /UG=Hs.326685 Homo sapiens carbamoyl-phosphate synthetase 1, mitochondrial (CPS1), mRNA                                                                                                                                                  |
| 220728_at   | -2.72 | gb:NM_025120.1 /DEF=Homo sapiens hypothetical protein FLJ13480 (FLJ13480), mRNA. /FEA=mRNA /GEN=FLJ13480 /PROD=hypothetical protein FLJ13480 /DB_XREF=gi:13376698 /UG=Hs.288734 hypothetical protein FLJ13480 /FL=gb:NM_025120.1                                                                                                               |
| 218779_x_at | -2.73 | gb:NM_017729.1 /DEF=Homo sapiens hypothetical protein FLJ20258 (FLJ20258), mRNA. /FEA=mRNA /GEN=FLJ20258 /PROD=hypothetical protein FLJ20258 /DB_XREF=gi:8923231 /UG=Hs.28907 hypothetical protein FLJ20258 /FL=gb:NM_017729.1                                                                                                                 |
| 206385_s_at | -2.73 | gb:NM_020987.1 /DEF=Homo sapiens ankyrin 3, node of Ranvier (ankyrin G) (ANK3), transcript variant 1, mRNA. /FEA=mRNA /GEN=ANK3 /PROD=ankyrin 3, isoform 1 /DB_XREF=gi:10947055 /UG=Hs.75893 ankyrin 3, node of Ranvier (ankyrin G) /FL=gb:NM_020987.1 gb:U13616.1                                                                             |
| 222209_s_at | -2.75 | Consensus includes gb:AK000684.1 /DEF=Homo sapiens cDNA FLJ20677 fis, clone KAIA4183. /FEA=mRNA /DB_XREF=gi:7020930 /UG=Hs.183887 hypothetical protein FLJ22104                                                                                                                                                                                |
| 206633_at   | -2.75 | gb:NM_000079.1 /DEF=Homo sapiens cholinergic receptor, nicotinic, alpha polypeptide 1 (muscle) (CHRNA1), mRNA. /FEA=mRNA /GEN=CHRNA1 /PROD=cholinergic receptor, nicotinic, alphapolypeptide 1 (muscle) precursor /DB_XREF=gi:4557456 /UG=Hs.2266 cholinergic receptor, nicotinic, alpha polypeptide 1 (muscle) /FL=gb:NM_000079.1             |
| 212307_s_at | -2.75 | Consensus includes gb:BF001665 /FEA=EST /DB_XREF=gi:10701940 /DB_XREF=est:7g91d11.x1 /CLONE=IMAGE:3313845 /UG=Hs.100293 O-linked N-acetylglucosamine (GlcNAc) transferase (UDP-N-acetylglucosamine:polypeptide-N-acetylglucosaminyl transferase)                                                                                               |
| 215504_x_at | -2.77 | Consensus includes gb:AF131777.1 /DEF=Homo sapiens clone 25061 mRNA sequence. /FEA=mRNA /DB_XREF=gi:4406602 /UG=Hs.183475 Homo sapiens clone 25061 mRNA sequence                                                                                                                                                                               |
| 205355_at   | -2.77 | gb:NM_001609.1 /DEF=Homo sapiens acyl-Coenzyme A dehydrogenase, shortbranched chain (ACADSB), nuclear                                                                                                                                                                                                                                          |



gene encoding mitochondrial protein, mRNA. /FEA=mRNA /GEN=ACADSB /PROD=acyl-Coenzyme A dehydrogenase, shortbranchedchain precursor /DB\_XREF=gi:4501858 /UG=Hs.81934 acyl-Coenzyme A dehydrogenase, shortbranched chain /FL=gb:NM\_001609.1 gb:U12778.1

64900\_at -2.78 Cluster Incl. AA401703:zt60f09.r1 Homo sapiens cDNA, 5 end /clone=IMAGE-726761 /clone\_end=5 /gb=AA401703 /gi=2057294 /ug=Hs.6853 /len=580

219317\_at -2.79 gb:NM\_007195.1 /DEF=Homo sapiens polymerase (DNA directed) iota (POLI), mRNA. /FEA=mRNA /GEN=POLI /PROD=polymerase (DNA directed) iota /DB\_XREF=gi:6005847 /UG=Hs.271699 polymerase (DNA directed) iota /FL=gb:AL136670.1 gb:AF140501.1 gb:NM\_007195.1 gb:AF245438.1

219080\_s\_at -2.8 gb:NM\_019857.1 /DEF=Homo sapiens CTP synthase II (CTPS2), mRNA. /FEA=mRNA /GEN=CTPS2 /PROD=CTP synthase II /DB\_XREF=gi:9789918 /UG=Hs.58553 CTP synthase II /FL=gb:AF226667.1 gb:NM\_019857.1

201940\_at -2.8 Consensus includes gb:AA897514 /FEA=EST /DB\_XREF=gi:3034134 /DB\_XREF=est:aj62b12.s1 /CLONE=IMAGE:1394879 /UG=Hs.5057 carboxypeptidase D /FL=gb:U65090.1 gb:D85390.1 gb:NM\_001304.2

218736\_s\_at -2.8 gb:NM\_017734.1 /DEF=Homo sapiens hypothetical protein FLJ20271 (FLJ20271), mRNA. /FEA=mRNA /GEN=FLJ20271 /PROD=hypothetical protein FLJ20271 /DB\_XREF=gi:8923242 /UG=Hs.14606 hypothetical protein FLJ20271 /FL=gb:NM\_017734.1

215577\_at -2.81 Consensus includes gb:AU146791 /FEA=EST /DB\_XREF=gi:11008312 /DB\_XREF=est:AU146791 /CLONE=HEM BB1001531 /UG=Hs.287474 Homo sapiens cDNA FLJ12000 fis, clone HEM BB1001531

205569\_at -2.82 gb:NM\_014398.1 /DEF=Homo sapiens similar to lysosome-associated membrane glycoprotein (TSC403), mRNA. /FEA=mRNA /GEN=TSC403 /PROD=similar to lysosome-associated membraneglycoprotein /DB\_XREF=gi:7657660 /UG=Hs.10887 similar to lysosome-associated membrane glycoprotein /FL=gb:AB013924.1 gb:NM\_014398.1

217028\_at -2.82 Consensus includes gb:AJ224869 /DEF=Homo sapiens CXCR4 gene encoding receptor CXCR4 /FEA=mRNA /DB\_XREF=gi:3059119 /UG=Hs.89414 chemokine (C-X-C motif), receptor 4 (fusin)

201943\_s\_at -2.83 gb:NM\_001304.2 /DEF=Homo sapiens carboxypeptidase D (CPD), mRNA. /FEA=mRNA /GEN=CPD /PROD=carboxypeptidase D precursor /DB\_XREF=gi:8051580 /UG=Hs.5057 carboxypeptidase D /FL=gb:U65090.1 gb:D85390.1 gb:NM\_001304.2

213186\_at -2.83 Consensus includes gb:BG502305 /FEA=EST /DB\_XREF=gi:13463822 /DB\_XREF=est:602550583F1 /CLONE=IMAGE:4657940 /UG=Hs.165662 KIAA0675 gene product

203845\_at -2.83 Consensus includes gb:AV727449 /FEA=EST /DB\_XREF=gi:10836870 /DB\_XREF=est:AV727449 /CLONE=HTCAYG01 /UG=Hs.199061 p300CBP-associated factor /FL=gb:U57317.2 gb:NM\_003884.2

219343\_at -2.84 gb:NM\_017913.1 /DEF=Homo sapiens hypothetical protein FLJ20639 (FLJ20639), mRNA. /FEA=mRNA /GEN=FLJ20639 /PROD=hypothetical protein FLJ20639 /DB\_XREF=gi:8923591 /UG=Hs.128646 hypothetical protein FLJ20639 /FL=gb:NM\_017913.1

218923\_at -2.84 Consensus includes gb:AW304174 /FEA=EST /DB\_XREF=gi:6713863 /DB\_XREF=est:xv61d01.x1 /CLONE=IMAGE:2817601 /UG=Hs.135578 chitobiase, di-N-acetyl- /FL=gb:M95767.1 gb:NM\_004388.1

207463\_x\_at -2.86 gb:NM\_002771.1 /DEF=Homo sapiens protease, serine, 3 (trypsin 3) (PRSS3), mRNA. /FEA=mRNA /GEN=PRSS3 /PROD=protease, serine, 3 (trypsin 3) /DB\_XREF=gi:4506148 /UG=Hs.278310 protease, serine, 3 (trypsin 3) /FL=gb:NM\_002771.1

205571\_at -2.86 gb:NM\_015929.1 /DEF=Homo sapiens lipoyltransferase (LOC51601), mRNA. /FEA=mRNA /GEN=LOC51601 /PROD=lipoyltransferase /DB\_XREF=gi:7706251 /UG=Hs.112356 lipoyltransferase /FL=gb:AB017566.1 gb:NM\_015929.1

221841\_s\_at -2.89 Consensus includes gb:BF514079 /FEA=EST /DB\_XREF=gi:11599258 /DB\_XREF=est:UI-H-BW1-amw-b-08-0-UI.s1 /CLONE=IMAGE:3071198 /UG=Hs.7934 Kruppel-like factor 4 (gut)

|             |       |                                                                                                                                                                                                                                                                                                                                                                             |
|-------------|-------|-----------------------------------------------------------------------------------------------------------------------------------------------------------------------------------------------------------------------------------------------------------------------------------------------------------------------------------------------------------------------------|
| 214373_at   | -2.89 | Consensus includes gb:A1582773 /FEA=EST /DB_XREF=gi:4568670 /DB_XREF=est:tn17d08.x1 /CLONE=IMAGE:2167887 /UG=Hs.125682 protein phosphatase 4 regulatory subunit 2                                                                                                                                                                                                           |
| 205479_s_at | -2.89 | gb:NM_002658.1 /DEF=Homo sapiens plasminogen activator, urokinase (PLAU), mRNA. /FEA=mRNA /GEN=PLAU /PROD=plasminogen activator, urokinase /DB_XREF=gi:4505862 /UG=Hs.77274 plasminogen activator, urokinase /FL=gb:M15476.1 gb:NM_002658.1                                                                                                                                 |
| 213359_at   | -2.9  | Consensus includes gb:W74620 /FEA=EST /DB_XREF=gi:1384833 /DB_XREF=est:zd77e04.s1 /CLONE=IMAGE:346686 /UG=Hs.303627 heterogeneous nuclear ribonucleoprotein D (AU-rich element RNA-binding protein 1, 37kD)                                                                                                                                                                 |
| 208608_s_at | -2.9  | gb:NM_021021.1 /DEF=Homo sapiens syntrophin, beta 1 (dystrophin-associated protein A1, 59kD, basic component 1) (SNTB1), mRNA. /FEA=CDS /GEN=SNTB1 /PROD=syntrophin, beta 1 (dystrophin-associated protein A1, 59kD, basic component 1) /DB_XREF=gi:11321639 /UG=Hs.95011 syntrophin, beta 1 (dystrophin-associated protein A1, 59kD, basic component 1) /FL=gb:NM_021021.1 |
| 218087_s_at | -2.9  | gb:NM_015385.1 /DEF=Homo sapiens SH3-domain protein 5 (ponsin) (SH3D5), mRNA. /FEA=mRNA /GEN=SH3D5 /PROD=ponsin /DB_XREF=gi:7661699 /UG=Hs.108924 SH3-domain protein 5 (ponsin) /FL=gb:AL117472.1 gb:NM_015385.1                                                                                                                                                            |
| 221586_s_at | -2.91 | gb:U15642.1 /DEF=Human transcription factor E2F-5 mRNA, complete cds. /FEA=mRNA /PROD=E2F-5 /DB_XREF=gi:758415 /UG=Hs.2331 E2F transcription factor 5, p130-binding /FL=gb:NM_001951.2 gb:U15642.1 gb:U31556.1                                                                                                                                                              |
| 215578_at   | -2.91 | Consensus includes gb:AU145365 /FEA=EST /DB_XREF=gi:11006886 /DB_XREF=est:AU145365 /CLONE=HEMBA1004629 /UG=Hs.287437 Homo sapiens cDNA FLJ11662 fis, clone HEMBA1004629                                                                                                                                                                                                     |
| 205633_s_at | -2.92 | gb:NM_000688.1 /DEF=Homo sapiens aminolevulinate, delta-, synthase 1 (ALAS1), nuclear gene encoding mitochondrial protein, mRNA. /FEA=mRNA /GEN=ALAS1 /PROD=aminolevulinate, delta-, synthase 1 /DB_XREF=gi:4502024 /UG=Hs.78712 aminolevulinate, delta-, synthase 1 /FL=gb:NM_000688.1                                                                                     |
| 212942_s_at | -2.92 | Consensus includes gb:AB033025.1 /DEF=Homo sapiens mRNA for KIAA1199 protein, partial cds. /FEA=mRNA /GEN=KIAA1199 /PROD=KIAA1199 protein /DB_XREF=gi:6330400 /UG=Hs.50081 KIAA1199 protein                                                                                                                                                                                 |
| 209114_at   | -2.93 | gb:AF133425.1 /DEF=Homo sapiens tetraspanin TM4-C mRNA, complete cds. /FEA=mRNA /PROD=tetraspanin TM4-C /DB_XREF=gi:6434903 /UG=Hs.38972 tetraspan 1 /FL=gb:AF054838.1 gb:AF065388.1 gb:NM_005727.1 gb:AF133425.1                                                                                                                                                           |
| 202259_s_at | -2.93 | gb:NM_014887.1 /DEF=Homo sapiens hypothetical protein from BCRA2 region (CG005), mRNA. /FEA=mRNA /GEN=CG005 /PROD=hypothetical protein from BCRA2 region /DB_XREF=gi:7656970 /UG=Hs.23518 hypothetical protein from BCRA2 region /FL=gb:NM_014887.1                                                                                                                         |
| 213017_at   | -2.94 | Consensus includes gb:AL534702 /FEA=EST /DB_XREF=gi:12798195 /DB_XREF=est:AL534702 /CLONE=CS0DF006YN17 (3 prime) /UG=Hs.13377 Homo sapiens clone 23649 and 23755 unknown mRNA, partial cds                                                                                                                                                                                  |
| 202202_s_at | -2.95 | gb:NM_002290.2 /DEF=Homo sapiens laminin, alpha 4 (LAMA4), mRNA. /FEA=mRNA /GEN=LAMA4 /PROD=laminin, alpha 4 precursor /DB_XREF=gi:9845494 /UG=Hs.78672 laminin, alpha 4 /FL=gb:NM_002290.2                                                                                                                                                                                 |
| 219880_at   | -2.95 | gb:NM_022907.1 /DEF=Homo sapiens hypothetical protein FLJ23053 (FLJ23053), mRNA. /FEA=mRNA /GEN=FLJ23053 /PROD=hypothetical protein FLJ23053 /DB_XREF=gi:12597650 /UG=Hs.94037 hypothetical protein FLJ23053 /FL=gb:NM_022907.1                                                                                                                                             |
| 203407_at   | -2.95 | gb:NM_002705.1 /DEF=Homo sapiens periplakin (PPL), mRNA. /FEA=mRNA /GEN=PPL /PROD=periplakin /DB_XREF=gi:4505992 /UG=Hs.74304 periplakin /FL=gb:AF001691.1 gb:NM_002705.1                                                                                                                                                                                                   |
| 200841_s_at | -2.96 | Consensus includes gb:A1142677 /FEA=EST /DB_XREF=gi:3659036 /DB_XREF=est:ok33h03.s1 /CLONE=IMAGE:1509653 /UG=Hs.55921 glutamyl-prolyl-tRNA synthetase /FL=gb:NM_004446.1                                                                                                                                                                                                    |

|             |       |                                                                                                                                                                                                                                                                                                                                                                                                                                                 |
|-------------|-------|-------------------------------------------------------------------------------------------------------------------------------------------------------------------------------------------------------------------------------------------------------------------------------------------------------------------------------------------------------------------------------------------------------------------------------------------------|
| 212459_x_at | -2.96 | Consensus includes gb:BF593940 /FEA=EST /DB_XREF=gi:11686264 /DB_XREF=est:nab48f10.x1 /CLONE=IMAGE:3269154 /UG=Hs.247309 succinate-CoA ligase, GDP-forming, beta subunit                                                                                                                                                                                                                                                                        |
| 216268_s_at | -2.97 | Consensus includes gb:U77914.1 /DEF=Human soluble protein Jagged mRNA, partial cds. /FEA=mRNA /PROD=soluble protein Jagged /DB_XREF=gi:1684889 /UG=Hs.91143 jagged 1 (Alagille syndrome)                                                                                                                                                                                                                                                        |
| 202454_s_at | -2.97 | gb:NM_001982.1 /DEF=Homo sapiens v-erb-b2 avian erythroblastic leukemia viral oncogene homolog 3 (ERBB3), mRNA. /FEA=mRNA /GEN=ERBB3 /PROD=v-erb-b2 avian erythroblastic leukemia viral oncogene homolog 3 /DB_XREF=gi:4503596 /UG=Hs.199067 v-erb-b2 avian erythroblastic leukemia viral oncogene homolog 3 /FL=gb:M29366.1 gb:M34309.1 gb:NM_001982.1                                                                                         |
| 203830_at   | -2.99 | gb:NM_022344.1 /DEF=Homo sapiens protein kinase Njmu-R1 (NJMU-R1), mRNA. /FEA=mRNA /GEN=NJMU-R1 /PROD=protein kinase Njmu-R1 /DB_XREF=gi:11641248 /UG=Hs.9800 protein kinase Njmu-R1 /FL=gb:AF305686.1 gb:NM_022344.1                                                                                                                                                                                                                           |
| 202769_at   | -3    | Consensus includes gb:AW134535 /FEA=EST /DB_XREF=gi:6138088 /DB_XREF=est:UI-H-B11-abv-g-06-0-UI.s1 /CLONE=IMAGE:2713163 /UG=Hs.79069 cyclin G2 /FL=gb:U47414.1 gb:NM_004354.1                                                                                                                                                                                                                                                                   |
| 205239_at   | -3    | gb:NM_001657.1 /DEF=Homo sapiens amphiregulin (schwannoma-derived growth factor) (AREG), mRNA. /FEA=mRNA /GEN=AREG /PROD=amphiregulin (schwannoma-derived growth factor) /DB_XREF=gi:4502198 /UG=Hs.270833 amphiregulin (schwannoma-derived growth factor) /FL=gb:M30704.1 gb:NM_001657.1                                                                                                                                                       |
| 207563_s_at | -3    | gb:U77413.1 /DEF=Human O-linked GlcNAc transferase mRNA, complete cds. /FEA=mRNA /PROD=O-linked GlcNAc transferase /DB_XREF=gi:2266993 /UG=Hs.100293 O-linked N-acetylglucosamine (GlcNAc) transferase (UDP-N-acetylglucosamine:polypeptide-N-acetylglucosaminyl transferase) /FL=gb:U77413.1 gb:NM_003605.2                                                                                                                                    |
| 210078_s_at | -3.02 | gb:L39833.1 /DEF=Homo sapiens (clone hKvBeta3) K+ channel beta subunit mRNA, complete cds. /FEA=mRNA /PROD=K+ channel beta-subunit /DB_XREF=gi:666896 /UG=Hs.172471 potassium voltage-gated channel, shaker-related subfamily, beta member 1 /FL=gb:L39833.1 gb:U16953.1                                                                                                                                                                        |
| 202800_at   | -3.02 | gb:NM_004172.1 /DEF=Homo sapiens solute carrier family 1 (glial high affinity glutamate transporter), member 3 (SLC1A3), nuclear gene encoding mitochondrial protein, mRNA. /FEA=mRNA /GEN=SLC1A3 /PROD=solute carrier family 1 (glial high affinity glutamate transporter), member 3 /DB_XREF=gi:4759125 /UG=Hs.75379 solute carrier family 1 (glial high affinity glutamate transporter), member 3 /FL=gb:D26443.1 gb:NM_004172.1 gb:U03504.1 |
| 203763_at   | -3.03 | gb:NM_016008.1 /DEF=Homo sapiens CGI-60 protein (LOC51626), mRNA. /FEA=mRNA /GEN=LOC51626 /PROD=CGI-60 protein /DB_XREF=gi:7706299 /UG=Hs.7627 CGI-60 protein /FL=gb:AF151818.1 gb:NM_016008.1                                                                                                                                                                                                                                                  |
| 207761_s_at | -3.04 | gb:NM_014033.1 /DEF=Homo sapiens DKFZP586A0522 protein (DKFZP586A0522), mRNA. /FEA=mRNA /GEN=DKFZP586A0522 /PROD=DKFZP586A0522 protein /DB_XREF=gi:13378140 /UG=Hs.288771 DKFZP586A0522 protein /FL=gb:NM_014033.1                                                                                                                                                                                                                              |
| 214835_s_at | -3.04 | Consensus includes gb:AF131748.1 /DEF=Homo sapiens clone 25191 GTP-specific succinyl-CoA synthetase beta subunit (SCS) mRNA sequence, partial cds. /FEA=mRNA /PROD=GTP-specific succinyl-CoA synthetase betasubunit /DB_XREF=gi:4406563 /UG=Hs.247309 succinate-CoA ligase, GDP-forming, beta subunit                                                                                                                                           |
| 207604_s_at | -3.04 | gb:NM_003615.1 /DEF=Homo sapiens solute carrier family 4, sodium bicarbonate cotransporter, member 7 (SLC4A7), mRNA. /FEA=mRNA /GEN=SLC4A7 /PROD=solute carrier family 4, sodium bicarbonate cotransporter, member 7 /DB_XREF=gi:4507028 /UG=Hs.132904 solute carrier family 4, sodium bicarbonate cotransporter, member 7 /FL=gb:AB012130.1 gb:NM_003615.1                                                                                     |
| 206043_s_at | -3.05 | gb:NM_014861.1 /DEF=Homo sapiens KIAA0703 gene product (KIAA0703), mRNA. /FEA=mRNA /GEN=KIAA0703 /PROD=KIAA0703 gene product /DB_XREF=gi:7662255 /UG=Hs.6168 KIAA0703 gene product /FL=gb:AB014603.1 gb:NM_014861.1                                                                                                                                                                                                                             |

|             |       |                                                                                                                                                                                                                                                                                                       |
|-------------|-------|-------------------------------------------------------------------------------------------------------------------------------------------------------------------------------------------------------------------------------------------------------------------------------------------------------|
| 204485_s_at | -3.06 | gb:NM_005486.1 /DEF=Homo sapiens target of myb1 (chicken) homolog-like 1 (TOM1L1), mRNA. /FEA=mRNA /GEN=TOM1L1 /PROD=target of myb1 (chicken) homolog-like 1 /DB_XREF=gi:4885638 /UG=Hs.153504 target of myb1 (chicken) homolog-like 1 /FL=gb:NM_005486.1                                             |
| 203779_s_at | -3.06 | gb:NM_005797.1 /DEF=Homo sapiens epithelial V-like antigen 1 (EVA1), mRNA. /FEA=mRNA /GEN=EVA1 /PROD=epithelial V-like antigen 1 precursor /DB_XREF=gi:5032246 /UG=Hs.116651 epithelial V-like antigen 1 /FL=gb:AF304447.1 gb:AF030455.1 gb:NM_005797.1 gb:AF275945.1                                 |
| 219388_at   | -3.08 | gb:NM_024915.1 /DEF=Homo sapiens hypothetical protein FLJ13782 (FLJ13782), mRNA. /FEA=mRNA /GEN=FLJ13782 /PROD=hypothetical protein FLJ13782 /DB_XREF=gi:13376381 /UG=Hs.257924 hypothetical protein FLJ13782 /FL=gb:NM_024915.1                                                                      |
| 210306_at   | -3.08 | gb:U89358.1 /DEF=Human I(3)mbt protein homolog mRNA, complete cds. /FEA=mRNA /PROD=I(3)mbt protein homolog /DB_XREF=gi:3811110 /UG=Hs.300863 lethal (3) malignant brain tumor I(3)mbt protein (Drosophila) homolog /FL=gb:U89358.1                                                                    |
| 209209_s_at | -3.08 | Consensus includes gb:AW469573 /FEA=EST /DB_XREF=gi:7039679 /DB_XREF=est:hd29e09.x1 /CLONE=IMAGE:2910952 /UG=Hs.75260 mitogen inducible 2 /FL=gb:Z24725.1                                                                                                                                             |
| 205842_s_at | -3.1  | gb:AF001362.1 /DEF=Homo sapiens Jak2 kinase (JAK2) mRNA, complete cds. /FEA=mRNA /GEN=JAK2 /PROD=Jak2 kinase /DB_XREF=gi:3236321 /UG=Hs.115541 Janus kinase 2 (a protein tyrosine kinase) /FL=gb:NM_004972.2 gb:AF005216.1 gb:AF058925.1 gb:AF001362.1                                                |
| 205229_s_at | -3.11 | Consensus includes gb:AA669336 /FEA=EST /DB_XREF=gi:2630835 /DB_XREF=est:ad47a02.s1 /CLONE=IMAGE:884810 /UG=Hs.21016 coagulation factor C (Limulus polyphemus) homology (cochlin) /FL=gb:AF006740.1 gb:NM_004086.1                                                                                    |
| 214437_s_at | -3.13 | Consensus includes gb:NM_005412.1 /DEF=Homo sapiens serine hydroxymethyltransferase 2 (mitochondrial) (SHMT2), mRNA. /FEA=CDS /GEN=SHMT2 /PROD=serine hydroxymethyltransferase 2(mitochondrial) /DB_XREF=gi:4885594 /UG=Hs.75069 serine hydroxymethyltransferase 2 (mitochondrial) /FL=gb:NM_005412.1 |
| 205808_at   | -3.14 | gb:NM_004318.1 /DEF=Homo sapiens aspartate beta-hydroxylase (ASPH), mRNA. /FEA=mRNA /GEN=ASPH /PROD=aspartate beta-hydroxylase /DB_XREF=gi:4757799 /UG=Hs.283664 aspartate beta-hydroxylase /FL=gb:U03109.1 gb:NM_004318.1                                                                            |
| 209122_at   | -3.19 | gb:BC005127.1 /DEF=Homo sapiens, adipose differentiation-related protein, clone MGC:10598, mRNA, complete cds. /FEA=mRNA /PROD=adipose differentiation-related protein /DB_XREF=gi:13477306 /UG=Hs.3416 adipose differentiation-related protein /FL=gb:BC005127.1 gb:NM_001122.1                      |
| 218858_at   | -3.21 | gb:NM_022783.1 /DEF=Homo sapiens hypothetical protein FLJ12428 (FLJ12428), mRNA. /FEA=mRNA /GEN=FLJ12428 /PROD=hypothetical protein FLJ12428 /DB_XREF=gi:12232472 /UG=Hs.87729 hypothetical protein FLJ12428 /FL=gb:AL136678.1 gb:NM_022783.1                                                         |
| 209884_s_at | -3.21 | gb:AF047033.1 /DEF=Homo sapiens sodium bicarbonate cotransporter 3 (SLC4A7) mRNA, complete cds. /FEA=mRNA /GEN=SLC4A7 /PROD=sodium bicarbonate cotransporter 3 /DB_XREF=gi:5051627 /UG=Hs.132904 solute carrier family 4, sodium bicarbonate cotransporter, member 7 /FL=gb:AF047033.1                |
| 221899_at   | -3.24 | Consensus includes gb:A1809961 /FEA=EST /DB_XREF=gi:5396527 /DB_XREF=est:wf64b09.x1 /CLONE=IMAGE:2360345 /UG=Hs.23518 hypothetical protein from BCRA2 region                                                                                                                                          |
| 215772_x_at | -3.25 | Consensus includes gb:AL050226.1 /DEF=Homo sapiens mRNA; cDNA DKFZp586M2023 (from clone DKFZp586M2023); partial cds. /FEA=mRNA /GEN=DKFZp586M2023 /PROD=hypothetical protein /DB_XREF=gi:4884469 /UG=Hs.247309 succinate-CoA ligase, GDP-forming, beta subunit                                        |
| 221218_s_at | -3.25 | gb:NM_022445.1 /DEF=Homo sapiens mouse thiamin pyrophosphokinase homolog (TPK1), mRNA. /FEA=mRNA /GEN=TPK1 /PROD=mouse thiamin pyrophosphokinase homolog /DB_XREF=gi:11990617 /UG=Hs.58715 thiamine pyrophosphokinase /FL=gb:NM_022445.1                                                              |

|             |       |                                                                                                                                                                                                                                                                                                        |
|-------------|-------|--------------------------------------------------------------------------------------------------------------------------------------------------------------------------------------------------------------------------------------------------------------------------------------------------------|
| 219443_at   | -3.25 | gb:NM_017714.1 /DEF=Homo sapiens hypothetical protein FLJ20212 (FLJ20212), mRNA. /FEA=mRNA /GEN=FLJ20212 /PROD=hypothetical protein FLJ20212 /DB_XREF=gi:8923201 /UG=Hs.88367 hypothetical protein FLJ20212 /FL=gb:NM_017714.1                                                                         |
| 209131_s_at | -3.3  | gb:U55936.1 /DEF=Human SNAP-23 mRNA, complete cds. /FEA=mRNA /PROD=SNAP-23 /DB_XREF=gi:1374812 /UG=Hs.184376 synaptosomal-associated protein, 23kD /FL=gb:BC000148.2<br>gb:BC003686.1 gb:U55936.1 gb:Y09567.1                                                                                          |
| 202887_s_at | -3.31 | gb:NM_019058.1 /DEF=Homo sapiens hypothetical protein (FLJ20500), mRNA. /FEA=mRNA /GEN=FLJ20500 /PROD=hypothetical protein /DB_XREF=gi:9506686 /UG=Hs.111244 hypothetical protein /FL=gb:AL136668.1<br>gb:NM_019058.1                                                                                  |
| 203817_at   | -3.31 | Consensus includes gb:W93728 /FEA=EST /DB_XREF=gi:1422918 /DB_XREF=est:zd96a11.s1 /CLONE=IMAGE:357308 /UG=Hs.77890 guanylate cyclase 1, soluble, beta 3 /FL=gb:NM_000857.1                                                                                                                             |
| 91826_at    | -3.35 | Cluster Incl. AI219073:qg16e08.x1 Homo sapiens cDNA, 3' end /clone=IMAGE-1759718 /clone_end=3 /gb=AI219073 /gi=3801276 /ug=Hs.126062 /len=555                                                                                                                                                          |
| 201942_s_at | -3.35 | gb:D85390.1 /DEF=Homo sapiens mRNA for gp180-carboxypeptidase D-like enzyme, complete cds. /FEA=mRNA /PROD=gp180-carboxypeptidase D-like enzyme /DB_XREF=gi:3641620 /UG=Hs.5057 carboxypeptidase D /FL=gb:U65090.1 gb:D85390.1 gb:NM_001304.2                                                          |
| 219014_at   | -3.37 | gb:NM_016619.1 /DEF=Homo sapiens hypothetical protein (LOC51316), mRNA. /FEA=mRNA /GEN=LOC51316 /PROD=hypothetical protein /DB_XREF=gi:7706157 /UG=Hs.107139 hypothetical protein /FL=gb:AF208846.1<br>gb:NM_016619.1                                                                                  |
| 204199_at   | -3.39 | gb:NM_014636.1 /DEF=Homo sapiens Ral guanine nucleotide exchange factor RalGPS1A (RalGPS1A), mRNA. /FEA=mRNA /GEN=RalGPS1A /PROD=Ral guanine nucleotide exchange factor RalGPS1A /DB_XREF=gi:7662069 /UG=Hs.170307 Ral guanine nucleotide exchange factor RalGPS1A /FL=gb:AB002349.1<br>gb:NM_014636.1 |
| 210377_at   | -3.42 | gb:D16350.1 /DEF=Human SA mRNA for SA gene product, complete cds. /FEA=mRNA /GEN=SA /DB_XREF=gi:4711131 /UG=Hs.181345 SA (rat hypertension-associated) homolog /FL=gb:D16350.1                                                                                                                         |
| 215203_at   | -3.43 | Consensus includes gb:AW438464 /FEA=EST /DB_XREF=gi:6973770 /DB_XREF=est:xu43g07.x1 /CLONE=IMAGE:2804508 /UG=Hs.288760 Homo sapiens cDNA FLJ12327 fis, clone MAMMA1002140                                                                                                                              |
| 201131_s_at | -3.44 | gb:NM_004360.1 /DEF=Homo sapiens cadherin 1, type 1, E-cadherin (epithelial) (CDH1), mRNA. /FEA=mRNA /GEN=CDH1 /PROD=cadherin 1, type 1, E-cadherin (epithelial) /DB_XREF=gi:4757959 /UG=Hs.194657 cadherin 1, type 1, E-cadherin (epithelial) /FL=gb:L08599.1 gb:NM_004360.1                          |
| 222358_x_at | -3.44 | Consensus includes gb:AI523613 /FEA=EST /DB_XREF=gi:4437748 /DB_XREF=est:tg95a07.x1 /CLONE=IMAGE:2116500 /UG=Hs.293495 ESTs, Weakly similar to ALU1_HUMAN ALU SUBFAMILY J SEQUENCE CONTAMINATION WARNING ENTRY H.sapiens                                                                               |
| 214705_at   | -3.44 | Consensus includes gb:AJ001306.1 /DEF=Homo sapiens mRNA for PDZ domain protein. /FEA=mRNA /PROD=PDZ domain protein /DB_XREF=gi:2370148 /UG=Hs.321197 PDZ domain protein (Drosophila inaD-like)                                                                                                         |
| 206548_at   | -3.44 | gb:NM_024880.1 /DEF=Homo sapiens hypothetical protein FLJ23556 (FLJ23556), mRNA. /FEA=mRNA /GEN=FLJ23556 /PROD=hypothetical protein FLJ23556 /DB_XREF=gi:13376321 /UG=Hs.214039 hypothetical protein FLJ23556 /FL=gb:NM_024880.1                                                                       |
| 205841_at   | -3.47 | gb:NM_004972.2 /DEF=Homo sapiens Janus kinase 2 (a protein tyrosine kinase) (JAK2), mRNA. /FEA=mRNA /GEN=JAK2 /PROD=Janus kinase 2 /DB_XREF=gi:13325062 /UG=Hs.115541 Janus kinase 2 (a protein tyrosine kinase) /FL=gb:NM_004972.2 gb:AF005216.1 gb:AF058925.1 gb:AF001362.1                          |
| 219115_s_at | -3.48 | gb:NM_014432.1 /DEF=Homo sapiens interleukin 20 receptor, alpha (IL20RA), mRNA. /FEA=mRNA /GEN=IL20RA /PROD=interleukin 20 receptor, alpha /DB_XREF=gi:7657690 /UG=Hs.21814 interleukin 20 receptor, alpha                                                                                             |

|             |       |                                                                                                                                                                                                                                                                                                                                                                |
|-------------|-------|----------------------------------------------------------------------------------------------------------------------------------------------------------------------------------------------------------------------------------------------------------------------------------------------------------------------------------------------------------------|
| 203896_s_at | -3.49 | /FL=gb:AF184971.1 gb:NM_014432.1<br>gb:NM_000933.1 /DEF=Homo sapiens phospholipase C, beta 4 (PLCB4), mRNA. /FEA=mRNA /GEN=PLCB4<br>/PROD=phospholipase C, beta 4 /DB_XREF=gi:4505866 /UG=Hs.283006 phospholipase C, beta 4<br>/FL=gb:NM_000933.1 gb:L41349.1                                                                                                  |
| 209498_at   | -3.5  | Consensus includes gb:X16354.1 /DEF=Human mRNA for transmembrane carcinoembryonic antigen BGPa<br>(formerly TM1-CEA). /FEA=mRNA /PROD=TM1-CEA preprotein /DB_XREF=gi:37197 /UG=Hs.50964<br>carcinoembryonic antigen-related cell adhesion molecule 1 (biliary glycoprotein) /FL=gb:J03858.1                                                                    |
| 212406_s_at | -3.52 | Consensus includes gb:AB028973.1 /DEF=Homo sapiens mRNA for KIAA1050 protein, partial cds. /FEA=mRNA<br>/GEN=KIAA1050 /PROD=KIAA1050 protein /DB_XREF=gi:5689436 /UG=Hs.184628 hypothetical protein<br>FLJ10883                                                                                                                                                |
| 218677_at   | -3.53 | gb:NM_020672.1 /DEF=Homo sapiens S100-type calcium binding protein A14 (LOC57402), mRNA. /FEA=mRNA<br>/GEN=LOC57402 /PROD=S100-type calcium binding protein A14 /DB_XREF=gi:10190711 /UG=Hs.288998 S100-<br>type calcium binding protein A14 /FL=gb:NM_020672.1 gb:BC005019.1 gb:AY007220.1                                                                    |
| 215314_at   | -3.54 | Consensus includes gb:AU146646 /FEA=EST /DB_XREF=gi:11008167 /DB_XREF=est:AU146646<br>/CLONE=HEMBB1001096 /UG=Hs.179752 Homo sapiens cDNA FLJ10270 fis, clone HEMBB1001096                                                                                                                                                                                     |
| 214823_at   | -3.58 | Consensus includes gb:AF033199.1 /DEF=Homo sapiens C2H2 zinc finger protein pseudogene, mRNA sequence.<br>/FEA=mRNA /DB_XREF=gi:3252864 /UG=Hs.8198 zinc finger protein 204                                                                                                                                                                                    |
| 220622_at   | -3.6  | gb:NM_024727.1 /DEF=Homo sapiens hypothetical protein FLJ23259 (FLJ23259), mRNA. /FEA=mRNA<br>/GEN=FLJ23259 /PROD=hypothetical protein FLJ23259 /DB_XREF=gi:13376039 /UG=Hs.114005 hypothetical<br>protein FLJ23259 /FL=gb:NM_024727.1                                                                                                                         |
| 217513_at   | -3.62 | Consensus includes gb:BG334495 /FEA=EST /DB_XREF=gi:13140933 /DB_XREF=est:602461128F1<br>/CLONE=IMAGE:4577718 /UG=Hs.228201 ESTs, Moderately similar to AF118094 25 PRO1992 H.sapiens                                                                                                                                                                          |
| 203509_at   | -3.64 | gb:NM_003105.2 /DEF=Homo sapiens sortilin-related receptor, L(DLR class) A repeats-containing (SORL1),<br>mRNA. /FEA=mRNA /GEN=SORL1 /PROD=sortilin-related receptor, L(DLR class) Arepeats-containing<br>/DB_XREF=gi:6325473 /UG=Hs.278571 sortilin-related receptor, L(DLR class) A repeats-containing<br>/FL=gb:U60975.2 gb:NM_003105.2                     |
| 218839_at   | -3.7  | gb:NM_012258.1 /DEF=Homo sapiens hairyenhancer-of-split related with YRPW motif 1 (HEY1), mRNA.<br>/FEA=mRNA /GEN=HEY1 /PROD=hairyenhancer-of-split related with YRPW motif1 /DB_XREF=gi:6912411<br>/UG=Hs.234434 hairyenhancer-of-split related with YRPW motif 1 /FL=gb:AF311883.1 gb:BC001873.1<br>gb:AF151522.1 gb:AF176422.1 gb:NM_012258.1 gb:AF232239.1 |
| 205500_at   | -3.72 | gb:NM_001735.1 /DEF=Homo sapiens complement component 5 (C5), mRNA. /FEA=mRNA /GEN=C5<br>/PROD=complement component 5 /DB_XREF=gi:4502506 /UG=Hs.1281 complement component 5<br>/FL=gb:M57729.1 gb:NM_001735.1                                                                                                                                                 |
| 221827_at   | -3.73 | Consensus includes gb:BE788439 /FEA=EST /DB_XREF=gi:10209637 /DB_XREF=est:601475616F1<br>/CLONE=IMAGE:3878643 /UG=Hs.247280 HBV associated factor                                                                                                                                                                                                              |
| 218976_at   | -3.73 | gb:NM_021800.1 /DEF=Homo sapiens J domain containing protein 1 (JDP1), mRNA. /FEA=mRNA /GEN=JDP1<br>/PROD=J domain containing protein 1 /DB_XREF=gi:11141870 /UG=Hs.260720 J domain containing protein 1<br>/FL=gb:NM_021800.1 gb:AF176012.1                                                                                                                   |
| 207781_s_at | -3.75 | gb:NM_021998.1 /DEF=Homo sapiens zinc finger protein 6 (CMPX1) (ZNF6), mRNA. /FEA=mRNA /GEN=ZNF6<br>/PROD=zinc finger protein 6 (CMPX1) /DB_XREF=gi:11527399 /UG=Hs.323950 zinc finger protein 6 (CMPX1)<br>/FL=gb:NM_021998.1                                                                                                                                 |
| 211559_s_at | -3.81 | gb:L49506.1 /DEF=Homo sapiens cyclin G2 mRNA, complete cds. /FEA=mRNA /PROD=cyclin G2<br>/DB_XREF=gi:1236234 /UG=Hs.79069 cyclin G2 /FL=gb:L49506.1                                                                                                                                                                                                            |

|             |       |                                                                                                                                                                                                                                                                                                                                                                                                        |
|-------------|-------|--------------------------------------------------------------------------------------------------------------------------------------------------------------------------------------------------------------------------------------------------------------------------------------------------------------------------------------------------------------------------------------------------------|
| 44783_s_at  | -3.81 | Cluster Incl. R61374:yh15e02.s1 Homo sapiens cDNA, 3 end /clone=IMAGE-37665 /clone_end=3 /gb=R61374 /gi=832069 /ug=Hs.234434 /len=434                                                                                                                                                                                                                                                                  |
| 208161_s_at | -3.82 | gb:NM_020037.1 /DEF=Homo sapiens ATP-binding cassette, sub-family C (CFTRMRP), member 3 (ABCC3), transcript variant MRP3A, mRNA. /FEA=mRNA /GEN=ABCC3 /PROD=ATP-binding cassette, sub-family C, member 3, isoform MRP3A /DB_XREF=gi:9955971 /UG=Hs.90786 ATP-binding cassette, sub-family C (CFTRMRP), member 3 /FL=gb:AF085691.1 gb:NM_020037.1                                                       |
| 205968_at   | -3.84 | gb:NM_002252.1 /DEF=Homo sapiens potassium voltage-gated channel, delayed-rectifier, subfamily S, member 3 (KCNS3), mRNA. /FEA=mRNA /GEN=KCNS3 /PROD=potassium voltage-gated channel, delayed-rectifier, subfamily S, member 3 /DB_XREF=gi:4504862 /UG=Hs.47584 potassium voltage-gated channel, delayed-rectifier, subfamily S, member 3 /FL=gb:BC004148.1 gb:BC004987.1 gb:AF043472.1 gb:NM_002252.1 |
| 218145_at   | -3.85 | gb:NM_021158.1 /DEF=Homo sapiens protein kinase domains containing protein similar to phosphoprotein C8FW (LOC57761), mRNA. /FEA=mRNA /GEN=LOC57761 /PROD=protein kinase domains containing proteins similar to phosphoprotein C8FW /DB_XREF=gi:11056039 /UG=Hs.26802 protein kinase domains containing protein similar to phosphoprotein C8FW /FL=gb:NM_021158.1                                      |
| 221698_s_at | -3.85 | gb:AF313468.1 /DEF=Homo sapiens dendritic cell-associated C-type lectin-1 mRNA, complete cds. /FEA=mRNA /PROD=dendritic cell-associated C-type lectin-1 /DB_XREF=gi:13649707 /FL=gb:AF313468.1                                                                                                                                                                                                         |
| 215250_at   | -3.86 | Consensus includes gb:AU147317 /FEA=EST /DB_XREF=gi:11008838 /DB_XREF=est:AU147317 /CLONE=MAMMA1000340 /UG=Hs.287491 Homo sapiens cDNA FLJ12140 fis, clone MAMMA1000340                                                                                                                                                                                                                                |
| 211668_s_at | -3.87 | gb:K03226.1 /DEF=Human preprourokinase mRNA, complete cds. /FEA=mRNA /GEN=PLAU /DB_XREF=gi:340155 /FL=gb:K03226.1                                                                                                                                                                                                                                                                                      |
| 220484_at   | -3.88 | gb:NM_018298.1 /DEF=Homo sapiens hypothetical protein FLJ11006 (FLJ11006), mRNA. /FEA=mRNA /GEN=FLJ11006 /PROD=hypothetical protein FLJ11006 /DB_XREF=gi:8922819 /UG=Hs.49344 hypothetical protein FLJ11006 /FL=gb:NM_018298.1                                                                                                                                                                         |
| 206546_at   | -3.9  | gb:NM_014258.1 /DEF=Homo sapiens synaptonemal complex protein 2 (SYCP2), mRNA. /FEA=mRNA /GEN=SYCP2 /PROD=synaptonemal complex protein 2 /DB_XREF=gi:7657634 /UG=Hs.202676 synaptonemal complex protein 2 /FL=gb:NM_014258.1                                                                                                                                                                           |
| 205583_s_at | -3.9  | gb:NM_024810.1 /DEF=Homo sapiens hypothetical protein FLJ23018 (FLJ23018), mRNA. /FEA=mRNA /GEN=FLJ23018 /PROD=hypothetical protein FLJ23018 /DB_XREF=gi:13376194 /UG=Hs.169078 hypothetical protein FLJ23018 /FL=gb:NM_024810.1                                                                                                                                                                       |
| 204466_s_at | -3.9  | Consensus includes gb:BG260394 /FEA=EST /DB_XREF=gi:12770210 /DB_XREF=est:602371523F1 /CLONE=IMAGE:4479556 /UG=Hs.76930 synuclein, alpha (non A4 component of amyloid precursor) /FL=gb:L08850.1 gb:NM_000345.2                                                                                                                                                                                        |
| 204389_at   | -3.91 | gb:NM_000240.1 /DEF=Homo sapiens monoamine oxidase A (MAOA), nuclear gene encoding mitochondrial protein, mRNA. /FEA=mRNA /GEN=MAOA /PROD=monoamine oxidase A /DB_XREF=gi:4557734 /UG=Hs.183109 monoamine oxidase A /FL=gb:M68840.1 gb:M69226.1 gb:NM_000240.1                                                                                                                                         |
| 215392_at   | -3.95 | Consensus includes gb:AU148154 /FEA=EST /DB_XREF=gi:11009675 /DB_XREF=est:AU148154 /CLONE=MAMMA1002744 /UG=Hs.298014 Homo sapiens cDNA FLJ14136 fis, clone MAMMA1002744                                                                                                                                                                                                                                |
| 205376_at   | -4    | gb:NM_003866.1 /DEF=Homo sapiens inositol polyphosphate-4-phosphatase, type II, 105kD (INPP4B), mRNA. /FEA=mRNA /GEN=INPP4B /PROD=inositol polyphosphate-4-phosphatase, type II, 105kD /DB_XREF=gi:4504706 /UG=Hs.153687 inositol polyphosphate-4-phosphatase, type II, 105kD /FL=gb:U96922.1 gb:NM_003866.1                                                                                           |
| 204268_at   | -4.04 | gb:NM_005978.2 /DEF=Homo sapiens S100 calcium-binding protein A2 (S100A2), mRNA. /FEA=mRNA /GEN=S100A2 /PROD=S100 calcium-binding protein A2 /DB_XREF=gi:9845513 /UG=Hs.38991 S100 calcium-binding protein A2 /FL=gb:BC002829.1 gb:NM_005978.2                                                                                                                                                         |

|             |       |                                                                                                                                                                                                                                                                                                                                                                                                                  |
|-------------|-------|------------------------------------------------------------------------------------------------------------------------------------------------------------------------------------------------------------------------------------------------------------------------------------------------------------------------------------------------------------------------------------------------------------------|
| 211429_s_at | -4.05 | gb:AF119873.1 /DEF=Homo sapiens PRO2275 mRNA, complete cds. /FEA=mRNA /PROD=PRO2275 /DB_XREF=gi:7770182 /UG=Hs.297681 serine (or cysteine) proteinase inhibitor, clade A (alpha-1 antitrypsin), member 1 /FL=gb:AF119873.1                                                                                                                                                                                       |
| 214790_at   | -4.05 | Consensus includes gb:AK001406.1 /DEF=Homo sapiens cDNA FLJ10544 fis, clone NT2RP2001601, highly similar to Homo sapiens mRNA for KIAA0797 protein. /FEA=mRNA /DB_XREF=gi:7022642 /UG=Hs.27197 SUMO-1-specific protease                                                                                                                                                                                          |
| 205769_at   | -4.07 | gb:NM_003645.1 /DEF=Homo sapiens fatty-acid-Coenzyme A ligase, very long-chain 1 (FACVL1), mRNA. /FEA=mRNA /GEN=FACVL1 /PROD=very long-chain fatty-acid-Coenzyme A ligase 1 /DB_XREF=gi:4503652 /UG=Hs.11729 fatty-acid-Coenzyme A ligase, very long-chain 1 /FL=gb:D88308.1 gb:AF096290.1 gb:NM_003645.1                                                                                                        |
| 216129_at   | -4.11 | Consensus includes gb:AL117659.1 /DEF=Homo sapiens mRNA; cDNA DKFZp586I0624 (from clone DKFZp586I0624). /FEA=mRNA /DB_XREF=gi:5912252 /UG=Hs.306353 Homo sapiens mRNA; cDNA DKFZp586I0624 (from clone DKFZp586I0624)                                                                                                                                                                                             |
| 202770_s_at | -4.19 | gb:NM_004354.1 /DEF=Homo sapiens cyclin G2 (CCNG2), mRNA. /FEA=mRNA /GEN=CCNG2 /PROD=cyclin G2 /DB_XREF=gi:4757935 /UG=Hs.79069 cyclin G2 /FL=gb:U47414.1 gb:NM_004354.1                                                                                                                                                                                                                                         |
| 210652_s_at | -4.24 | gb:BC004399.1 /DEF=Homo sapiens, clone MGC:10985, mRNA, complete cds. /FEA=mRNA /PROD=Unknown (protein for MGC:10985) /DB_XREF=gi:13325163 /UG=Hs.125783 DEME-6 protein /FL=gb:BC004399.1                                                                                                                                                                                                                        |
| 208966_x_at | -4.24 | gb:AF208043.1 /DEF=Homo sapiens IFI16b (IFI16b) mRNA, complete cds. /FEA=mRNA /GEN=IFI16b /PROD=IFI16b /DB_XREF=gi:6644296 /UG=Hs.155530 interferon, gamma-inducible protein 16 /FL=gb:AF208043.1                                                                                                                                                                                                                |
| 207078_at   | -4.3  | gb:NM_005466.1 /DEF=Homo sapiens RNA polymerase II transcriptional regulation mediator (Med6, S. cerevisiae, homolog of) (MED6), mRNA. /FEA=mRNA /GEN=MED6 /PROD=RNA polymerase II transcriptional regulationmediator (Med6, S. cerevisiae, homolog of) /DB_XREF=gi:4885480 /UG=Hs.167738 RNA polymerase II transcriptional regulation mediator (Med6, S. cerevisiae, homolog of) /FL=gb:U78082.1 gb:NM_005466.1 |
| 202847_at   | -4.35 | gb:NM_004563.1 /DEF=Homo sapiens phosphoenolpyruvate carboxykinase 2 (mitochondrial) (PCK2), mRNA. /FEA=mRNA /GEN=PCK2 /PROD=phosphoenolpyruvate carboxykinase 2(mitochondrial) /DB_XREF=gi:4758885 /UG=Hs.75812 phosphoenolpyruvate carboxykinase 2 (mitochondrial) /FL=gb:BC001454.1 gb:NM_004563.1                                                                                                            |
| 219734_at   | -4.36 | gb:NM_017699.1 /DEF=Homo sapiens hypothetical protein FLJ20174 (FLJ20174), mRNA. /FEA=mRNA /GEN=FLJ20174 /PROD=hypothetical protein FLJ20174 /DB_XREF=gi:8923170 /UG=Hs.114556 hypothetical protein FLJ20174 /FL=gb:NM_017699.1                                                                                                                                                                                  |
| 205009_at   | -4.36 | gb:NM_003225.1 /DEF=Homo sapiens trefoil factor 1 (breast cancer, estrogen-inducible sequence expressed in) (TFF1), mRNA. /FEA=mRNA /GEN=TFF1 /PROD=trefoil factor 1 (breast cancer,estrogen-inducible sequence expressed in) /DB_XREF=gi:4507450 /UG=Hs.1406 trefoil factor 1 (breast cancer, estrogen-inducible sequence expressed in) /FL=gb:NM_003225.1                                                      |
| 211094_s_at | -4.41 | gb:D12625.1 /DEF=Human mRNA for NF1 protein isoform (neurofibromin isoform), complete cds. /FEA=mRNA /GEN=NF1 /PROD=NF1 protein isoform /DB_XREF=gi:219939 /UG=Hs.93207 neurofibromin 1 (neurofibromatosis, von Recklinghausen disease, Watson disease) /FL=gb:D12625.1                                                                                                                                          |
| 213307_at   | -4.44 | Consensus includes gb:AF131790.1 /DEF=Homo sapiens clone 24903 mRNA sequence. /FEA=mRNA /DB_XREF=gi:4406618 /UG=Hs.12696 cortactin SH3 domain-binding protein                                                                                                                                                                                                                                                    |
| 204734_at   | -4.45 | gb:NM_002275.1 /DEF=Homo sapiens keratin 15 (KRT15), mRNA. /FEA=mRNA /GEN=KRT15 /PROD=keratin 15 /DB_XREF=gi:4504914 /UG=Hs.80342 keratin 15 /FL=gb:BC002641.1 gb:NM_002275.1                                                                                                                                                                                                                                    |
| 214078_at   | -4.48 | Consensus includes gb:AF070581.1 /DEF=Homo sapiens clone 24540 mRNA sequence. /FEA=mRNA /DB_XREF=gi:3387953 /UG=Hs.153529 Homo sapiens clone 24540 mRNA sequence                                                                                                                                                                                                                                                 |



|             |       |                                                                                                                                                                                                                                                                                                                                               |
|-------------|-------|-----------------------------------------------------------------------------------------------------------------------------------------------------------------------------------------------------------------------------------------------------------------------------------------------------------------------------------------------|
| 204019_s_at | -4.52 | gb:NM_015677.1 /DEF=Homo sapiens hypothetical protein (DKFZP586F1318), mRNA. /FEA=mRNA /GEN=DKFZP586F1318 /PROD=hypothetical protein /DB_XREF=gi:7661669 /UG=Hs.25213 hypothetical protein /FL=gb:NM_015677.1                                                                                                                                 |
| 204891_s_at | -4.53 | gb:NM_005356.1 /DEF=Homo sapiens lymphocyte-specific protein tyrosine kinase (LCK), mRNA. /FEA=mRNA /GEN=LCK /PROD=lymphocyte-specific protein tyrosine kinase /DB_XREF=gi:4885448 /UG=Hs.1765 lymphocyte-specific protein tyrosine kinase /FL=gb:M36881.1 gb:U07236.1 gb:NM_005356.1                                                         |
| 205576_at   | -4.54 | gb:NM_000185.2 /DEF=Homo sapiens serine (or cysteine) proteinase inhibitor, clade D (heparin cofactor), member 1 (SERPIND1), mRNA. /FEA=mRNA /GEN=SERPIND1 /PROD=heparin cofactor II precursor /DB_XREF=gi:7262380 /UG=Hs.1478 serine (or cysteine) proteinase inhibitor, clade D (heparin cofactor), member 1 /FL=gb:M12849.1 gb:NM_000185.2 |
| 218983_at   | -4.56 | gb:NM_016546.1 /DEF=Homo sapiens complement C1r-like proteinase precursor, (LOC51279), mRNA. /FEA=mRNA /GEN=LOC51279 /PROD=complement C1r-like proteinase precursor, /DB_XREF=gi:7706082 /UG=Hs.98571 complement C1r-like proteinase precursor, /FL=gb:AF178985.1 gb:NM_016546.1                                                              |
| 217678_at   | -4.68 | Consensus includes gb:AA488687 /FEA=EST /DB_XREF=gi:2216118 /DB_XREF=est:ab38f03.s1 /CLONE=IMAGE:843101 /UG=Hs.284235 ESTs                                                                                                                                                                                                                    |
| 214753_at   | -4.7  | Consensus includes gb:AW084068 /FEA=EST /DB_XREF=gi:6039220 /DB_XREF=est:xc26c06.x1 /CLONE=IMAGE:2585386 /UG=Hs.110630 Human BRCA2 region, mRNA sequence CG006                                                                                                                                                                                |
| 219288_at   | -4.81 | gb:NM_020685.1 /DEF=Homo sapiens HT021 (HT021), mRNA. /FEA=mRNA /GEN=HT021 /PROD=HT021 /DB_XREF=gi:10190735 /UG=Hs.47166 HT021 /FL=gb:NM_020685.1 gb:AF236158.1                                                                                                                                                                               |
| 220892_s_at | -4.88 | gb:NM_021154.1 /DEF=Homo sapiens phosphoserine aminotransferase (PSA), mRNA. /FEA=mRNA /GEN=PSA /PROD=phosphoserine aminotransferase /DB_XREF=gi:10863954 /UG=Hs.286049 phosphoserine aminotransferase /FL=gb:NM_021154.1 gb:AF113132.1                                                                                                       |
| 215123_at   | -4.99 | Consensus includes gb:AL049250.1 /DEF=Homo sapiens mRNA; cDNA DKFZp564D113 (from clone DKFZp564D113). /FEA=mRNA /DB_XREF=gi:4499989 /UG=Hs.194637 BANP homolog, SMAR1 homolog                                                                                                                                                                 |
| 220518_at   | -5.02 | gb:NM_024801.1 /DEF=Homo sapiens hypothetical protein FLJ21551 (FLJ21551), mRNA. /FEA=mRNA /GEN=FLJ21551 /PROD=hypothetical protein FLJ21551 /DB_XREF=gi:13376176 /UG=Hs.159231 hypothetical protein FLJ21551 /FL=gb:NM_024801.1                                                                                                              |
| 204086_at   | -5.06 | gb:NM_006115.1 /DEF=Homo sapiens preferentially expressed antigen in melanoma (PRAME), mRNA. /FEA=mRNA /GEN=PRAME /PROD=preferentially expressed antigen of melanoma /DB_XREF=gi:5174640 /UG=Hs.30743 preferentially expressed antigen in melanoma /FL=gb:U65011.1 gb:NM_006115.1                                                             |
| 212816_s_at | -5.16 | Consensus includes gb:BE613178 /FEA=EST /DB_XREF=gi:9894775 /DB_XREF=est:601452166T1 /CLONE=IMAGE:3855712 /UG=Hs.84152 cystathionine-beta-synthase                                                                                                                                                                                            |
| 209921_at   | -5.19 | gb:AB040875.1 /DEF=Homo sapiens hxCT mRNA for cystineglutamate exchanger, complete cds. /FEA=mRNA /GEN=hxCT /PROD=cystineglutamate exchanger /DB_XREF=gi:13516845 /UG=Hs.6682 solute carrier family 7, (cationic amino acid transporter, y+ system) member 11 /FL=gb:AB040875.1                                                               |
| 215717_s_at | -5.31 | Consensus includes gb:X62009.1 /DEF=Homo sapiens partial mRNA for fibrillin 5. /FEA=mRNA /PROD=fibrillin 5 /DB_XREF=gi:31399 /UG=Hs.79432 fibrillin 2 (congenital contractural arachnodactyly)                                                                                                                                                |
| 203914_x_at | -5.33 | gb:NM_000860.1 /DEF=Homo sapiens hydroxyprostaglandin dehydrogenase 15-(NAD) (HPGD), mRNA. /FEA=mRNA /GEN=HPGD /PROD=hydroxyprostaglandin dehydrogenase 15-(NAD) /DB_XREF=gi:4504478 /UG=Hs.77348 hydroxyprostaglandin dehydrogenase 15-(NAD) /FL=gb:L76465.1 gb:NM_000860.1                                                                  |
| 218723_s_at | -5.37 | gb:NM_014059.1 /DEF=Homo sapiens RGC32 protein (RGC32), mRNA. /FEA=mRNA /GEN=RGC32 /PROD=RGC32 protein /DB_XREF=gi:7662650 /UG=Hs.76640 RGC32 protein /FL=gb:AF036549.1 gb:NM_014059.1                                                                                                                                                        |

|             |       |                                                                                                                                                                                                                                                                                                                                                                                  |
|-------------|-------|----------------------------------------------------------------------------------------------------------------------------------------------------------------------------------------------------------------------------------------------------------------------------------------------------------------------------------------------------------------------------------|
| 205047_s_at | -5.38 | gb:NM_001673.1 /DEF=Homo sapiens asparagine synthetase (ASNS), mRNA. /FEA=mRNA /GEN=ASNS /PROD=asparagine synthetase /DB_XREF=gi:4502258 /UG=Hs.75692 asparagine synthetase /FL=gb:M27396.1 gb:NM_001673.1                                                                                                                                                                       |
| 210286_s_at | -5.42 | gb:AF053755.1 /DEF=Homo sapiens bicarbonate transporter (BT) mRNA, complete cds. /FEA=mRNA /GEN=BT /PROD=bicarbonate transporter /DB_XREF=gi:6650103 /UG=Hs.132904 solute carrier family 4, sodium bicarbonate cotransporter, member 7 /FL=gb:AF053755.1                                                                                                                         |
| 210587_at   | -5.42 | gb:BC005161.1 /DEF=Homo sapiens, Similar to inhibin beta E, clone MGC:4638, mRNA, complete cds. /FEA=mRNA /PROD=Similar to inhibin beta E /DB_XREF=gi:13477368 /UG=Hs.279497 Homo sapiens, Similar to inhibin beta E, clone MGC:4638, mRNA, complete cds /FL=gb:BC005161.1                                                                                                       |
| 219121_s_at | -5.53 | gb:NM_017697.1 /DEF=Homo sapiens hypothetical protein FLJ20171 (FLJ20171), mRNA. /FEA=mRNA /GEN=FLJ20171 /PROD=hypothetical protein FLJ20171 /DB_XREF=gi:8923166 /UG=Hs.24743 hypothetical protein FLJ20171 /FL=gb:NM_017697.1                                                                                                                                                   |
| 211549_s_at | -5.68 | gb:U63296.1 /DEF=Human 15-hydroxyprostaglandin dehydrogenase mRNA, complete cds. /FEA=mRNA /PROD=15-hydroxyprostaglandin dehydrogenase /DB_XREF=gi:2047312 /UG=Hs.77348 hydroxyprostaglandin dehydrogenase 15-(NAD) /FL=gb:U63296.1                                                                                                                                              |
| 205541_s_at | -5.79 | gb:NM_018094.1 /DEF=Homo sapiens hypothetical protein FLJ10441 (FLJ10441), mRNA. /FEA=mRNA /GEN=FLJ10441 /PROD=hypothetical protein FLJ10441 /DB_XREF=gi:8922423 /UG=Hs.59523 hypothetical protein FLJ10441 /FL=gb:NM_018094.1                                                                                                                                                   |
| 212560_at   | -5.8  | Consensus includes gb:AV728268 /FEA=EST /DB_XREF=gi:10837689 /DB_XREF=est:AV728268 /CLONE=HTCACH05 /UG=Hs.82845 Homo sapiens cDNA: FLJ21930 fis, clone HEP04301, highly similar to HSU90916 Human clone 23815 mRNA sequence                                                                                                                                                      |
| 215083_at   | -5.81 | Consensus includes gb:AL049263.1 /DEF=Homo sapiens mRNA; cDNA DKFZp564F133 (from clone DKFZp564F133). /FEA=mRNA /DB_XREF=gi:4500011 /UG=Hs.306292 Homo sapiens mRNA; cDNA DKFZp564F133 (from clone DKFZp564F133)                                                                                                                                                                 |
| 205584_at   | -5.84 | gb:NM_024810.1 /DEF=Homo sapiens hypothetical protein FLJ23018 (FLJ23018), mRNA. /FEA=mRNA /GEN=FLJ23018 /PROD=hypothetical protein FLJ23018 /DB_XREF=gi:13376194 /UG=Hs.169078 hypothetical protein FLJ23018 /FL=gb:NM_024810.1                                                                                                                                                 |
| 81737_at    | -5.95 | Cluster Incl. AI424872:tg38f10.x1 Homo sapiens cDNA, 3' end /clone=IMAGE-2111083 /clone_end=3 /gb=AI424872 /gi=4270895 /ug=Hs.159375 /len=443                                                                                                                                                                                                                                    |
| 211548_s_at | -6.37 | gb:J05594.1 /DEF=Homo sapiens NAD+-dependent 15-hydroxyprostaglandin dehydrogenase (PDGH) mRNA, complete cds. /FEA=mRNA /GEN=PDGH /PROD=NAD+-dependent 15-hydroxyprostaglandin dehydrogenase /DB_XREF=gi:1203981 /UG=Hs.77348 hydroxyprostaglandin dehydrogenase 15-(NAD) /FL=gb:J05594.1                                                                                        |
| 209655_s_at | -6.58 | Consensus includes gb:AI803181 /FEA=EST /DB_XREF=gi:5368653 /DB_XREF=est:tc15a07.x1 /CLONE=IMAGE:2063892 /UG=Hs.8769 Homo sapiens mRNA; cDNA DKFZp761J17121 (from clone DKFZp761J17121); complete cds /FL=gb:AL136550.1                                                                                                                                                          |
| 206332_s_at | -6.69 | gb:NM_005531.1 /DEF=Homo sapiens interferon, gamma-inducible protein 16 (IFI16), mRNA. /FEA=mRNA /GEN=IFI16 /PROD=interferon, gamma-inducible protein 16 /DB_XREF=gi:5031778 /UG=Hs.155530 interferon, gamma-inducible protein 16 /FL=gb:M63838.1 gb:NM_005531.1                                                                                                                 |
| 206081_at   | -6.97 | gb:NM_004727.1 /DEF=Homo sapiens solute carrier family 24 (sodiumpotassiumcalcium exchanger), member 1 (SLC24A1), mRNA. /FEA=mRNA /GEN=SLC24A1 /PROD=solute carrier family 24(sodiumpotassiumcalcium exchanger), member 1 /DB_XREF=gi:4759127 /UG=Hs.173092 solute carrier family 24 (sodiumpotassiumcalcium exchanger), member 1 /FL=gb:AF062921.1 gb:AF062922.1 gb:NM_004727.1 |
| 209656_s_at | -6.97 | gb:AL136550.1 /DEF=Homo sapiens mRNA; cDNA DKFZp761J17121 (from clone DKFZp761J17121); complete                                                                                                                                                                                                                                                                                  |

|             |        |                                                                                                                                                                                                                                                                                                                                                                                                                                                                                     |
|-------------|--------|-------------------------------------------------------------------------------------------------------------------------------------------------------------------------------------------------------------------------------------------------------------------------------------------------------------------------------------------------------------------------------------------------------------------------------------------------------------------------------------|
| 213285_at   | -7.15  | cds. /FEA=mRNA /GEN=DKFZp761J17121 /PROD=hypothetical protein /DB_XREF=gi:13276606 /UG=Hs.8769 Homo sapiens mRNA; cDNA DKFZp761J17121 (from clone DKFZp761J17121); complete cds /FL=gb:AL136550.1 Consensus includes gb:AV691491 /FEA=EST /DB_XREF=gi:10293354 /DB_XREF=est:AV691491 /CLONE=GKCEEB10 /UG=Hs.85335 Homo sapiens mRNA; cDNA DKFZp564D1462 (from clone DKFZp564D1462)                                                                                                  |
| 201884_at   | -7.25  | gb:NM_004363.1 /DEF=Homo sapiens carcinoembryonic antigen-related cell adhesion molecule 5 (CEACAM5), mRNA. /FEA=mRNA /GEN=CEACAM5 /PROD=carcinoembryonic antigen-related cell adhesionmolecule 5 /DB_XREF=gi:11386170 /UG=Hs.220529 carcinoembryonic antigen-related cell adhesion molecule 5 /FL=gb:NM_004363.1 gb:M29540.1                                                                                                                                                       |
| 205857_at   | -7.43  | Consensus includes gb:AI269290 /FEA=EST /DB_XREF=gi:3888457 /DB_XREF=est:qi25g05.x1 /CLONE=IMAGE:1857560 /UG=Hs.1813 solute carrier family 18 (vesicular monoamine), member 2 /FL=gb:L14269.1 gb:L09118.1 gb:L23205.1 gb:NM_003054.1                                                                                                                                                                                                                                                |
| 206290_s_at | -7.64  | gb:NM_002924.1 /DEF=Homo sapiens regulator of G-protein signalling 7 (RGS7), mRNA. /FEA=mRNA /GEN=RGS7 /PROD=regulator of G-protein signalling 7 /DB_XREF=gi:11140808 /UG=Hs.79348 regulator of G-protein signalling 7 /FL=gb:NM_002924.1 gb:AF090116.1                                                                                                                                                                                                                             |
| 203913_s_at | -8.41  | Consensus includes gb:AL574184 /FEA=EST /DB_XREF=gi:12934146 /DB_XREF=est:AL574184 /CLONE=CS0DI039YJ22 (3 prime) /UG=Hs.77348 hydroxyprostaglandin dehydrogenase 15-(NAD) /FL=gb:L76465.1 gb:NM_000860.1                                                                                                                                                                                                                                                                            |
| 210762_s_at | -8.63  | gb:AF026219.1 /DEF=Homo sapiens HP protein (HP) mRNA, complete cds. /FEA=mRNA /GEN=HP /PROD=HP protein /DB_XREF=gi:2559001 /UG=Hs.8700 deleted in liver cancer 1 /FL=gb:AF026219.1 gb:AF035119.1 gb:NM_006094.2                                                                                                                                                                                                                                                                     |
| 221665_s_at | -9.18  | gb:BC004907.1 /DEF=Homo sapiens, Similar to RIKEN cDNA 4632407K17 gene, clone MGC:4642, mRNA, complete cds. /FEA=mRNA /PROD=Similar to RIKEN cDNA 4632407K17 gene /DB_XREF=gi:13436193 /UG=Hs.28907 hypothetical protein FLJ20258 /FL=gb:BC004907.1                                                                                                                                                                                                                                 |
| 205513_at   | -9.21  | gb:NM_001062.1 /DEF=Homo sapiens transcobalamin I (vitamin B12 binding protein, R binder family) (TCN1), mRNA. /FEA=mRNA /GEN=TCN1 /PROD=transcobalamin I (vitamin B12 binding protein, Rbinder family) /DB_XREF=gi:4507406 /UG=Hs.2012 transcobalamin I (vitamin B12 binding protein, R binder family) /FL=gb:J05068.1 gb:NM_001062.1                                                                                                                                              |
| 209859_at   | -9.57  | gb:AF220036.1 /DEF=Homo sapiens tripartite motif protein TRIM9 isoform alpha (TRIM9) mRNA, complete cds; alternatively spliced. /FEA=mRNA /GEN=TRIM9 /PROD=tripartite motif protein TRIM9 isoform alpha /DB_XREF=gi:12407402 /UG=Hs.75090 KIAA0282 protein /FL=gb:AF220036.1 gb:AF220037.1 gb:AF220038.1                                                                                                                                                                            |
| 202833_s_at | -9.73  | gb:NM_000295.1 /DEF=Homo sapiens serine (or cysteine) proteinase inhibitor, clade A (alpha-1 antiproteinase, antitrypsin), member 1 (SERPINA1), mRNA. /FEA=mRNA /GEN=SERPINA1 /PROD=serine (or cysteine) proteinase inhibitor, cladeA (alpha-1 antiproteinase, antitrypsin), member 1 /DB_XREF=gi:4505792 /UG=Hs.297681 serine (or cysteine) proteinase inhibitor, clade A (alpha-1 antiproteinase, antitrypsin), member 1 /FL=gb:AF130068.1 gb:M11465.1 gb:K01396.1 gb:NM_000295.1 |
| 201667_at   | -10.77 | gb:NM_000165.2 /DEF=Homo sapiens gap junction protein, alpha 1, 43kD (connexin 43) (GJA1), mRNA. /FEA=mRNA /GEN=GJA1 /PROD=connexin 43 /DB_XREF=gi:4755136 /UG=Hs.74471 gap junction protein, alpha 1, 43kD (connexin 43) /FL=gb:M65188.1 gb:NM_000165.2                                                                                                                                                                                                                            |
| 205856_at   | -14.94 | gb:NM_015865.1 /DEF=Homo sapiens solute carrier family 14 (urea transporter), member 1 (Kidd blood group) (SLC14A1), mRNA. /FEA=mRNA /GEN=SLC14A1 /PROD=RACH1 /DB_XREF=gi:7706676 /UG=Hs.171731 solute carrier family 14 (urea transporter), member 1 (Kidd blood group) /FL=gb:U35735.1 gb:NM_015865.1                                                                                                                                                                             |
| 222145_at   | -15.7  | Consensus includes gb:AK027225.1 /DEF=Homo sapiens cDNA: FLJ23572 fis, clone LNG12403. /FEA=mRNA                                                                                                                                                                                                                                                                                                                                                                                    |

|           |        |                                                                                                                                                                                                                                                                                                                             |
|-----------|--------|-----------------------------------------------------------------------------------------------------------------------------------------------------------------------------------------------------------------------------------------------------------------------------------------------------------------------------|
| 219855_at | -19.09 | /DB_XREF=gi:10440306 /UG=Hs.201593 Homo sapiens cDNA: FLJ23572 fis, clone LNG12403<br>gb:NM_018159.1 /DEF=Homo sapiens hypothetical protein FLJ10628 (FLJ10628), mRNA. /FEA=mRNA<br>/GEN=FLJ10628 /PROD=hypothetical protein FLJ10628 /DB_XREF=gi:8922558 /UG=Hs.200016 hypothetical<br>protein FLJ10628 /FL=gb:NM_018159.1 |
| 204726_at | -23.4  | gb:NM_001257.1 /DEF=Homo sapiens cadherin 13, H-cadherin (heart) (CDH13), mRNA. /FEA=mRNA<br>/GEN=CDH13 /PROD=cadherin 13, H-cadherin (heart) /DB_XREF=gi:4502718 /UG=Hs.63984 cadherin 13, H-<br>cadherin (heart) /FL=gb:U59288.1 gb:U59289.1 gb:NM_001257.1 gb:L34058.1                                                   |
| 218435_at | -26.83 | gb:NM_013238.1 /DEF=Homo sapiens DNAJ domain-containing (MCJ), mRNA. /FEA=mRNA /GEN=MCJ<br>/PROD=DNAJ domain-containing /DB_XREF=gi:7019452 /UG=Hs.279884 DNAJ domain-containing<br>/FL=gb:AF126743.1 gb:NM_013238.1                                                                                                        |

## Supplementary Figure 1

Tumor formation by PC-3 derivative cell xenografts. A. PC-3 cells and derivative lines were grown to 80% confluence in a Hyperflask under tissue culture conditions in IMEM containing 10% FBS and 1.2mg/ml G418, trypsinized, and resuspended in IMEM containing 10% FBS to deactivate trypsin. Following two additional washes in cold PBS, a solution of  $3 \times 10^6$  cells/100 $\mu$ l PBS were inoculated into the ventral surface of 5 week old female NCr-nude mice and tumors (n=20) were measured in two dimensions once a week for eight weeks. The graph shows average size of PC-3 cell tumors with standard deviations. Tumors were resected at 8 weeks and analyzed by immunohistochemistry. B. Immunohistochemical analysis of derivative PC-3 cell lines for NKX3.1 expression. Cultured PC-3 cells were embedded in 1% agarose before paraffin-embedding, sectioning, and staining. Tumor xenografts were dissected at 8 weeks post-inoculation and immediately immersed in 10% buffered formalin before paraffin embedding, sectioning and staining. Slides were microwaved for 5 minutes and immersed in two washes of xylene, followed by successive washes in 100%, 90%, and 70% ethanol, followed by a 5 minute wash in PBS. Slides were steamed in 10mM citrate buffer before being incubated in blocking buffer and NKX3.1 primary antibody solution, followed by application of Biotin-anti-mouse secondary antibody solution. The Vectastain Elite ABC and Vector VIP substrate kits were used for immunohistochemical staining. Slides were visualized with a Zeiss Axioplan-2 microscope and photographs were taken with a Nikon Coolpix 5000 digital camera. On the left are panels with photomicrographs of cultured cells with nuclear expression of NKX3.1. On the right are the respective tumor

xenografts at 8 weeks. As a positive control for expression of NKX3.1 in a xenograft an LNCaP tumor is shown at the bottom.

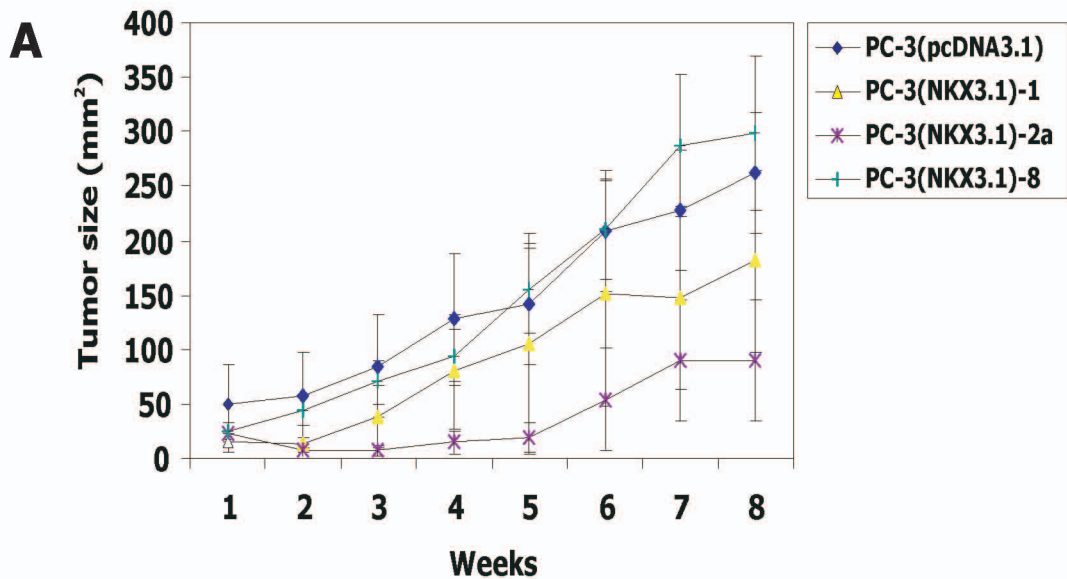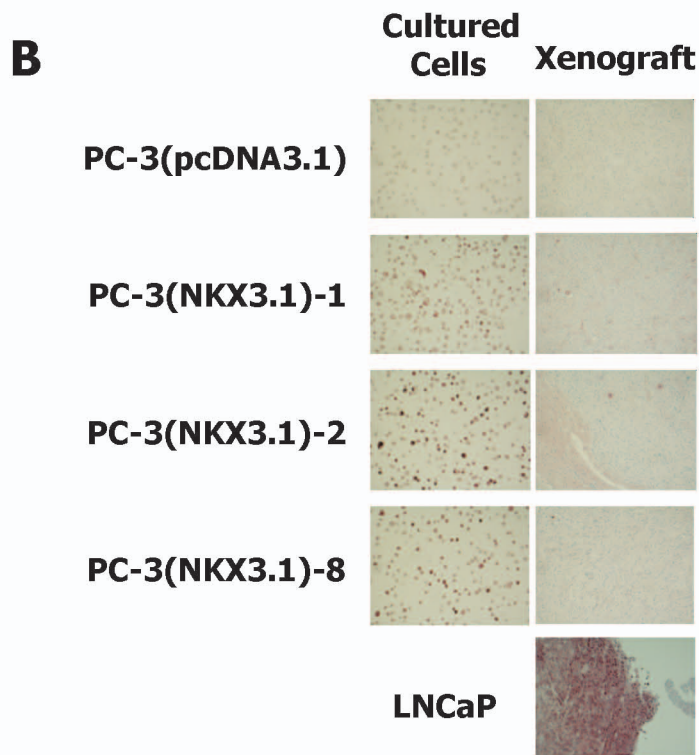

Supplement: NIHMS495120-supplement-1.pdf [file NIHMS495120-supplement-1.pdf]
